# Supplementary material for: Entwicklung und inhaltliche Validierung eines Fragebogens für funktionelle Bewegungsstörungen
Source: Springer Nature journal article supplement (doi:10.1007/s00115-021-01247-1), 2021-12-23
Supplement: MOESM1 [file 19974526]

**Tabelle S1: Veränderungen entsprechend den Expertenkommentare und -bewertungen**

| <b>Art der Veränderung</b> | <b>Gegenstand der Veränderung</b> | <b>Beispiel</b>                                                                                                                                                                                                                                                                                                                                                                                                                         |
|----------------------------|-----------------------------------|-----------------------------------------------------------------------------------------------------------------------------------------------------------------------------------------------------------------------------------------------------------------------------------------------------------------------------------------------------------------------------------------------------------------------------------------|
| Umformulierung             | 6 Stammfragen und 14 Einzelitems  | Stammfrage: „Wie stark beeinträchtigt Ihre Bewegungsstörung folgende Bereiche Ihres Lebens?“ statt „Wie stark wirkt sich Ihre Bewegungsstörung auf folgende Bereiche des Lebens aus?“;<br>Einzelitem: „Muskelschwäche oder –lähmung“ statt „Lähmung oder Muskelschwäche“.                                                                                                                                                               |
| Zusammenlegung             | 2 Stammfragen                     | Die Stammfrage „Wie sicher können Sie folgende Bewegungen <u>ohne</u> Unterstützung oder Hilfsmittel ausführen?“ wurde mit „Wie sicher können Sie folgende Bewegungen <u>mit</u> Unterstützung oder Hilfsmittel ausführen?“ zu der Stammfrage „Wie sicher können Sie folgende Bewegungen ausführen?“ mit Antwortmöglichkeiten auf einer vierstufigen Likert-Skala von „sicher“ bis „nicht möglich, auch nicht mit Hilfsmittel“ vereint. |
|                            | 4 Einzelitems                     | Die Einzelitems „Linkes Bein“ und „Rechtes Bein“ wurden zu dem Einzelitem „Beine und Füße“ verschmolzen.                                                                                                                                                                                                                                                                                                                                |
| Verschiebung               | 1 Stammfrage                      | Die Stammfrage „Fühlen Sie sich durch folgende Beschwerden beeinträchtigt, wenn Sie sich bewegen?“ wurde direkt an den                                                                                                                                                                                                                                                                                                                  |

Fragenblock Wie oft treten folgende Beschwerden auf?  
angeschlossen.

|           |               |                                                                                                                                                                                                                                                                 |
|-----------|---------------|-----------------------------------------------------------------------------------------------------------------------------------------------------------------------------------------------------------------------------------------------------------------|
|           | 6 Einzelitems | In dem Fragenblock „Beeinträchtigt Ihre Bewegungsstörung folgende Aktivitäten?“ wurde das Einzelitem „Essen und Trinken“ vor das Item „Schreiben und Tippen“ gezogen.                                                                                           |
| Ergänzung | 4 Einzelitems | Das Einzelitem „Muskelverkrampfung“ wurde in dem Fragenblock „Fühlen Sie sich durch folgende Beschwerden beeinträchtigt, wenn Sie sich bewegen?“ ergänzt, um alle Beschwerden des vorherigen Fragenblocks „Wie oft treten folgende Probleme auf?“ aufzugreifen. |
| Splitting | 2 Einzelitems | Das Item „Unkoordinierte Bewegungen“ wurde in das Item „Unwillkürliche Bewegungen“ und das Item „Ungezielte Bewegungen (Koordinationsstörungen)“ geteilt.                                                                                                       |
| Löschung  | 2 Einzelitems | Einzelitems, die sich auf die Fähigkeit „Tasche tragen“ bezogen, wurden gelöscht.                                                                                                                                                                               |
