# Supplementary material for: Entwicklung und inhaltliche Validierung eines Fragebogens für funktionelle Bewegungsstörungen
Source: Springer Nature journal article supplement (doi:10.1007/s00115-021-01247-1), 2021-12-23
Supplement: MOESM2 [file 19974526]

**Tabelle S2: Veränderungen entsprechend den kognitiven Interviews mit Betroffenen**

| <b>Problemfeld</b>        | <b>Art der Veränderung</b>         | <b>Gegenstand der Veränderung</b> | <b>Beispiele</b>                                                                                                                                                                                                                                                                                            |
|---------------------------|------------------------------------|-----------------------------------|-------------------------------------------------------------------------------------------------------------------------------------------------------------------------------------------------------------------------------------------------------------------------------------------------------------|
| Undeutlicher Bezugsrahmen | Unterstreichung                    | 4 Stammfragen                     | „Beeinträchtigt <u>Ihre Bewegungsstörung</u> folgende Aktivitäten?“<br>oder „Fühlen Sie sich durch folgende Beschwerden beeinträchtigt, <u>wenn Sie sich bewegen?</u> “                                                                                                                                     |
|                           | Umformulierung                     | 3 Stammfragen; 1 Einzelitem       | „Fühlen Sie sich <i>im Alltag</i> durch folgende Beschwerden beeinträchtigt, <u>wenn Sie sich bewegen?</u> “ statt „Fühlen Sie sich durch folgende Beschwerden beeinträchtigt, <u>wenn Sie sich bewegen?</u> “;<br>„Wie oft treten folgende Beschwerden auf?“ statt „Wie oft treten folgende Probleme auf?“ |
|                           | Umformulierung und Unterstreichung | 1 Stammfrage                      | „Wie häufig sind folgende Körperteile <u>von Ihrer Bewegungsstörung</u> betroffen?“ statt „Wie häufig sind folgende Körperteile betroffen?“                                                                                                                                                                 |
|                           | Ergänzung                          | Fragebogeninstruktion             | Falls Ihre Beschwerden sehr wechselhaft sind, legen Sie Ihren Antworten einen typischen schlechten Tag innerhalb der letzten zwei Wochen zugrunde.                                                                                                                                                          |

|                                          |                |                |                                                                                                                                                                                                                                                                                                                                                                                                                       |
|------------------------------------------|----------------|----------------|-----------------------------------------------------------------------------------------------------------------------------------------------------------------------------------------------------------------------------------------------------------------------------------------------------------------------------------------------------------------------------------------------------------------------|
| Fehlender Aspekt                         | Ergänzung      | 3 Einzelitems  | Das Einzelitem „Bewegungsblockade oder –starre“ wurde als Antwortmöglichkeit auf die Stammfragen „Wie oft treten folgende Beschwerden auf?“ und „Fühlen Sie sich im Alltag durch folgende Beschwerden beeinträchtigt, <u>wenn Sie sich bewegen?</u> “ ergänzt; das Einzelitem „1 kg heben oder tragen“ wurde als Antwortmöglichkeit auf die Stammfrage „Wie sicher können Sie folgende Bewegungen ausführen?“ ergänzt |
| Fehlende Möglichkeit zur Differenzierung | Ergänzung      | 2 Fragenblöcke | Die vierstufige Likert-Skala (1: „gar nicht“ bis 4: „stark“) wurde auf eine fünfstufige Likert-Skala (1: „gar nicht“ bis 5: „sehr stark“) erweitert                                                                                                                                                                                                                                                                   |
| Missverständliche Formulierung           | Umformulierung | 1 Einzelitem   | „Stehen“ statt „Frei stehen“ als zu beantwortendes Item auf die Frage „Wie sicher können Sie folgende Bewegungen ausführen?“, da sonst die Antwortmöglichkeiten „nur mit Hilfsmittel möglich“ und „nicht möglich, auch nicht mit Hilfsmittel“ nicht passen.                                                                                                                                                           |
