# Supplementary material for: Entwicklung und inhaltliche Validierung eines Fragebogens für funktionelle Bewegungsstörungen
Source: Springer Nature journal article supplement (doi:10.1007/s00115-021-01247-1), 2021-12-23
Supplement: MOESM3 [file 19974526]

### Tabelle S3: Detaillierte Aufstellung der Veränderungen

CVI: Content Validity Index; KI: Kognitive Interviews; die Veränderungen sind jeweils gelb markiert

## Fragebogen für funktionelle Bewegungsstörungen

Dieser Fragebogen soll das Ausmaß und die Auswirkungen Ihrer Bewegungsstörung erfassen.

Bitte beantworten Sie alle Fragen, indem Sie in jeder Reihe jeweils ein Kästchen markieren.

Die Fragen beziehen sich auf Ihre Erfahrungen **in den letzten zwei Wochen**.

Falls Ihre Beschwerden sehr wechselhaft sind, legen Sie Ihren Antworten einen typischen schlechten Tag innerhalb der letzten zwei Wochen zugrunde.

|  |                                                                                                                                                                                                                                        |
|--|----------------------------------------------------------------------------------------------------------------------------------------------------------------------------------------------------------------------------------------|
|  | <p><b>KI:</b><br/><b>Umformulierung (Fragebogeninstruktion)</b></p> <ul style="list-style-type: none"><li>• Konkretisierung der Anweisung, um Betroffenen mit stark fluktuierenden Beschwerden das Ausfüllen zu erleichtern.</li></ul> |
|--|----------------------------------------------------------------------------------------------------------------------------------------------------------------------------------------------------------------------------------------|

| <b>Version 1:</b><br><b>1a. Wie oft treten folgende Probleme auf?</b>                                                                                                                                                                                                                                     | <b>Version 2:</b><br><b>1a. Wie oft treten folgende Probleme auf?</b> | <b>Version 3:</b><br><b>1a. Wie oft treten folgende Beschwerden auf?</b> |                          |                          |       |                          |                          |                          |                          |                          |                                                                                                                                                                                                                                                                                                           |     |        |          |        |       |                          |                          |                          |                          |                          |                                                                                                                                                                                                                                                                                                           |     |        |          |        |       |                          |                          |                          |                          |                          |
|-----------------------------------------------------------------------------------------------------------------------------------------------------------------------------------------------------------------------------------------------------------------------------------------------------------|-----------------------------------------------------------------------|--------------------------------------------------------------------------|--------------------------|--------------------------|-------|--------------------------|--------------------------|--------------------------|--------------------------|--------------------------|-----------------------------------------------------------------------------------------------------------------------------------------------------------------------------------------------------------------------------------------------------------------------------------------------------------|-----|--------|----------|--------|-------|--------------------------|--------------------------|--------------------------|--------------------------|--------------------------|-----------------------------------------------------------------------------------------------------------------------------------------------------------------------------------------------------------------------------------------------------------------------------------------------------------|-----|--------|----------|--------|-------|--------------------------|--------------------------|--------------------------|--------------------------|--------------------------|
| Lähmung oder Muskelschwäche                                                                                                                                                                                                                                                                               | Muskelschwäche oder –lähmung                                          | Muskelschwäche oder –lähmung                                             |                          |                          |       |                          |                          |                          |                          |                          |                                                                                                                                                                                                                                                                                                           |     |        |          |        |       |                          |                          |                          |                          |                          |                                                                                                                                                                                                                                                                                                           |     |        |          |        |       |                          |                          |                          |                          |                          |
| <table border="1"> <tr> <th>nie</th> <th>selten</th> <th>manchmal</th> <th>häufig</th> <th>immer</th> </tr> <tr> <td><input type="checkbox"/></td> <td><input type="checkbox"/></td> <td><input type="checkbox"/></td> <td><input type="checkbox"/></td> <td><input type="checkbox"/></td> </tr> </table> | nie                                                                   | selten                                                                   | manchmal                 | häufig                   | immer | <input type="checkbox"/> | <input type="checkbox"/> | <input type="checkbox"/> | <input type="checkbox"/> | <input type="checkbox"/> | <table border="1"> <tr> <th>nie</th> <th>selten</th> <th>manchmal</th> <th>häufig</th> <th>immer</th> </tr> <tr> <td><input type="checkbox"/></td> <td><input type="checkbox"/></td> <td><input type="checkbox"/></td> <td><input type="checkbox"/></td> <td><input type="checkbox"/></td> </tr> </table> | nie | selten | manchmal | häufig | immer | <input type="checkbox"/> | <input type="checkbox"/> | <input type="checkbox"/> | <input type="checkbox"/> | <input type="checkbox"/> | <table border="1"> <tr> <th>nie</th> <th>selten</th> <th>manchmal</th> <th>häufig</th> <th>immer</th> </tr> <tr> <td><input type="checkbox"/></td> <td><input type="checkbox"/></td> <td><input type="checkbox"/></td> <td><input type="checkbox"/></td> <td><input type="checkbox"/></td> </tr> </table> | nie | selten | manchmal | häufig | immer | <input type="checkbox"/> | <input type="checkbox"/> | <input type="checkbox"/> | <input type="checkbox"/> | <input type="checkbox"/> |
| nie                                                                                                                                                                                                                                                                                                       | selten                                                                | manchmal                                                                 | häufig                   | immer                    |       |                          |                          |                          |                          |                          |                                                                                                                                                                                                                                                                                                           |     |        |          |        |       |                          |                          |                          |                          |                          |                                                                                                                                                                                                                                                                                                           |     |        |          |        |       |                          |                          |                          |                          |                          |
| <input type="checkbox"/>                                                                                                                                                                                                                                                                                  | <input type="checkbox"/>                                              | <input type="checkbox"/>                                                 | <input type="checkbox"/> | <input type="checkbox"/> |       |                          |                          |                          |                          |                          |                                                                                                                                                                                                                                                                                                           |     |        |          |        |       |                          |                          |                          |                          |                          |                                                                                                                                                                                                                                                                                                           |     |        |          |        |       |                          |                          |                          |                          |                          |
| nie                                                                                                                                                                                                                                                                                                       | selten                                                                | manchmal                                                                 | häufig                   | immer                    |       |                          |                          |                          |                          |                          |                                                                                                                                                                                                                                                                                                           |     |        |          |        |       |                          |                          |                          |                          |                          |                                                                                                                                                                                                                                                                                                           |     |        |          |        |       |                          |                          |                          |                          |                          |
| <input type="checkbox"/>                                                                                                                                                                                                                                                                                  | <input type="checkbox"/>                                              | <input type="checkbox"/>                                                 | <input type="checkbox"/> | <input type="checkbox"/> |       |                          |                          |                          |                          |                          |                                                                                                                                                                                                                                                                                                           |     |        |          |        |       |                          |                          |                          |                          |                          |                                                                                                                                                                                                                                                                                                           |     |        |          |        |       |                          |                          |                          |                          |                          |
| nie                                                                                                                                                                                                                                                                                                       | selten                                                                | manchmal                                                                 | häufig                   | immer                    |       |                          |                          |                          |                          |                          |                                                                                                                                                                                                                                                                                                           |     |        |          |        |       |                          |                          |                          |                          |                          |                                                                                                                                                                                                                                                                                                           |     |        |          |        |       |                          |                          |                          |                          |                          |
| <input type="checkbox"/>                                                                                                                                                                                                                                                                                  | <input type="checkbox"/>                                              | <input type="checkbox"/>                                                 | <input type="checkbox"/> | <input type="checkbox"/> |       |                          |                          |                          |                          |                          |                                                                                                                                                                                                                                                                                                           |     |        |          |        |       |                          |                          |                          |                          |                          |                                                                                                                                                                                                                                                                                                           |     |        |          |        |       |                          |                          |                          |                          |                          |

|                                                                                                                                                                                    |                                                                                                                                                                                                                       |
|------------------------------------------------------------------------------------------------------------------------------------------------------------------------------------|-----------------------------------------------------------------------------------------------------------------------------------------------------------------------------------------------------------------------|
| <b>CVI : 1,0</b><br><b>Umformulierung (Einzelitem)</b><br>Berücksichtigter Kommentar:<br><ul style="list-style-type: none"> <li>„Vielleicht wäre Muskellähmung besser?“</li> </ul> | <b>KI:</b><br><b>Umformulierung (Stammfrage)</b><br><ul style="list-style-type: none"> <li>Konkordante Begrifflichkeit unterstützt Betroffene, Fragenblock 1 und 2 miteinander in Zusammenhang zu bringen.</li> </ul> |
|------------------------------------------------------------------------------------------------------------------------------------------------------------------------------------|-----------------------------------------------------------------------------------------------------------------------------------------------------------------------------------------------------------------------|

| <b>Version 1:</b><br><b>1c. Wie oft treten folgende Probleme auf?</b>                                                                                                                                                                                                                                     | <b>Version 2:</b><br><b>1b. Wie oft treten folgende Probleme auf?</b> | <b>Version 3:</b><br><b>1b. Wie oft treten folgende Beschwerden auf?</b> |                          |                          |       |                          |                          |                          |                          |                          |                                                                                                                                                                                                                                                                                                           |     |        |          |        |       |                          |                          |                          |                          |                          |                                                                                                                                                                                                                                                                                                           |     |        |          |        |       |                          |                          |                          |                          |                          |
|-----------------------------------------------------------------------------------------------------------------------------------------------------------------------------------------------------------------------------------------------------------------------------------------------------------|-----------------------------------------------------------------------|--------------------------------------------------------------------------|--------------------------|--------------------------|-------|--------------------------|--------------------------|--------------------------|--------------------------|--------------------------|-----------------------------------------------------------------------------------------------------------------------------------------------------------------------------------------------------------------------------------------------------------------------------------------------------------|-----|--------|----------|--------|-------|--------------------------|--------------------------|--------------------------|--------------------------|--------------------------|-----------------------------------------------------------------------------------------------------------------------------------------------------------------------------------------------------------------------------------------------------------------------------------------------------------|-----|--------|----------|--------|-------|--------------------------|--------------------------|--------------------------|--------------------------|--------------------------|
| Verkrampfung                                                                                                                                                                                                                                                                                              | Muskelverkrampfung                                                    | Muskelverkrampfung                                                       |                          |                          |       |                          |                          |                          |                          |                          |                                                                                                                                                                                                                                                                                                           |     |        |          |        |       |                          |                          |                          |                          |                          |                                                                                                                                                                                                                                                                                                           |     |        |          |        |       |                          |                          |                          |                          |                          |
| <table border="1"> <tr> <th>nie</th> <th>selten</th> <th>manchmal</th> <th>häufig</th> <th>immer</th> </tr> <tr> <td><input type="checkbox"/></td> <td><input type="checkbox"/></td> <td><input type="checkbox"/></td> <td><input type="checkbox"/></td> <td><input type="checkbox"/></td> </tr> </table> | nie                                                                   | selten                                                                   | manchmal                 | häufig                   | immer | <input type="checkbox"/> | <input type="checkbox"/> | <input type="checkbox"/> | <input type="checkbox"/> | <input type="checkbox"/> | <table border="1"> <tr> <th>nie</th> <th>selten</th> <th>manchmal</th> <th>häufig</th> <th>immer</th> </tr> <tr> <td><input type="checkbox"/></td> <td><input type="checkbox"/></td> <td><input type="checkbox"/></td> <td><input type="checkbox"/></td> <td><input type="checkbox"/></td> </tr> </table> | nie | selten | manchmal | häufig | immer | <input type="checkbox"/> | <input type="checkbox"/> | <input type="checkbox"/> | <input type="checkbox"/> | <input type="checkbox"/> | <table border="1"> <tr> <th>nie</th> <th>selten</th> <th>manchmal</th> <th>häufig</th> <th>immer</th> </tr> <tr> <td><input type="checkbox"/></td> <td><input type="checkbox"/></td> <td><input type="checkbox"/></td> <td><input type="checkbox"/></td> <td><input type="checkbox"/></td> </tr> </table> | nie | selten | manchmal | häufig | immer | <input type="checkbox"/> | <input type="checkbox"/> | <input type="checkbox"/> | <input type="checkbox"/> | <input type="checkbox"/> |
| nie                                                                                                                                                                                                                                                                                                       | selten                                                                | manchmal                                                                 | häufig                   | immer                    |       |                          |                          |                          |                          |                          |                                                                                                                                                                                                                                                                                                           |     |        |          |        |       |                          |                          |                          |                          |                          |                                                                                                                                                                                                                                                                                                           |     |        |          |        |       |                          |                          |                          |                          |                          |
| <input type="checkbox"/>                                                                                                                                                                                                                                                                                  | <input type="checkbox"/>                                              | <input type="checkbox"/>                                                 | <input type="checkbox"/> | <input type="checkbox"/> |       |                          |                          |                          |                          |                          |                                                                                                                                                                                                                                                                                                           |     |        |          |        |       |                          |                          |                          |                          |                          |                                                                                                                                                                                                                                                                                                           |     |        |          |        |       |                          |                          |                          |                          |                          |
| nie                                                                                                                                                                                                                                                                                                       | selten                                                                | manchmal                                                                 | häufig                   | immer                    |       |                          |                          |                          |                          |                          |                                                                                                                                                                                                                                                                                                           |     |        |          |        |       |                          |                          |                          |                          |                          |                                                                                                                                                                                                                                                                                                           |     |        |          |        |       |                          |                          |                          |                          |                          |
| <input type="checkbox"/>                                                                                                                                                                                                                                                                                  | <input type="checkbox"/>                                              | <input type="checkbox"/>                                                 | <input type="checkbox"/> | <input type="checkbox"/> |       |                          |                          |                          |                          |                          |                                                                                                                                                                                                                                                                                                           |     |        |          |        |       |                          |                          |                          |                          |                          |                                                                                                                                                                                                                                                                                                           |     |        |          |        |       |                          |                          |                          |                          |                          |
| nie                                                                                                                                                                                                                                                                                                       | selten                                                                | manchmal                                                                 | häufig                   | immer                    |       |                          |                          |                          |                          |                          |                                                                                                                                                                                                                                                                                                           |     |        |          |        |       |                          |                          |                          |                          |                          |                                                                                                                                                                                                                                                                                                           |     |        |          |        |       |                          |                          |                          |                          |                          |
| <input type="checkbox"/>                                                                                                                                                                                                                                                                                  | <input type="checkbox"/>                                              | <input type="checkbox"/>                                                 | <input type="checkbox"/> | <input type="checkbox"/> |       |                          |                          |                          |                          |                          |                                                                                                                                                                                                                                                                                                           |     |        |          |        |       |                          |                          |                          |                          |                          |                                                                                                                                                                                                                                                                                                           |     |        |          |        |       |                          |                          |                          |                          |                          |

|                                                                                                                                                                                                                                                                                                                                                                                         |                                                                                                                                                                                                                       |
|-----------------------------------------------------------------------------------------------------------------------------------------------------------------------------------------------------------------------------------------------------------------------------------------------------------------------------------------------------------------------------------------|-----------------------------------------------------------------------------------------------------------------------------------------------------------------------------------------------------------------------|
| <b>CVI : 1,0</b><br><b>Umformulierung (Einzelitem)</b><br>Berücksichtigter Kommentar:<br><ul style="list-style-type: none"> <li>„Muskelverkrampfung fände ich besser.“</li> </ul> <b>Itemverschiebung innerhalb des Fragenblocks</b><br>Berücksichtigter Kommentar:<br><ul style="list-style-type: none"> <li>„Aus meiner Sicht besser: Reihenfolge der Fragen 1a-d ändern.“</li> </ul> | <b>KI:</b><br><b>Umformulierung (Stammfrage)</b><br><ul style="list-style-type: none"> <li>Konkordante Begrifflichkeit unterstützt Betroffene, Fragenblock 1 und 2 miteinander in Zusammenhang zu bringen.</li> </ul> |
|-----------------------------------------------------------------------------------------------------------------------------------------------------------------------------------------------------------------------------------------------------------------------------------------------------------------------------------------------------------------------------------------|-----------------------------------------------------------------------------------------------------------------------------------------------------------------------------------------------------------------------|

|                                                                       |                          |                          |                          |                          |                                                                       |                          |                          |                          |                          |                                                                                 |                          |                          |                          |                          |
|-----------------------------------------------------------------------|--------------------------|--------------------------|--------------------------|--------------------------|-----------------------------------------------------------------------|--------------------------|--------------------------|--------------------------|--------------------------|---------------------------------------------------------------------------------|--------------------------|--------------------------|--------------------------|--------------------------|
| <b>Version 1:</b><br><b>1d. Wie oft treten folgende Probleme auf?</b> |                          |                          |                          |                          | <b>Version 2:</b><br><b>1c. Wie oft treten folgende Probleme auf?</b> |                          |                          |                          |                          | <b>Version 3:</b><br><b>1c. Wie oft treten folgende <b>Beschwerden</b> auf?</b> |                          |                          |                          |                          |
| Zittern oder Zucken                                                   |                          |                          |                          |                          | Zittern oder Muskelzuckungen                                          |                          |                          |                          |                          | Zittern oder Muskelzuckungen                                                    |                          |                          |                          |                          |
| nie                                                                   | selten                   | manchmal                 | häufig                   | immer                    | nie                                                                   | selten                   | manchmal                 | häufig                   | immer                    | nie                                                                             | selten                   | manchmal                 | häufig                   | immer                    |
| <input type="checkbox"/>                                              | <input type="checkbox"/> | <input type="checkbox"/> | <input type="checkbox"/> | <input type="checkbox"/> | <input type="checkbox"/>                                              | <input type="checkbox"/> | <input type="checkbox"/> | <input type="checkbox"/> | <input type="checkbox"/> | <input type="checkbox"/>                                                        | <input type="checkbox"/> | <input type="checkbox"/> | <input type="checkbox"/> | <input type="checkbox"/> |

|                                                                                                                                                                                                                                                                                                                                                                                                           |                                                                                                                                                                                                                    |
|-----------------------------------------------------------------------------------------------------------------------------------------------------------------------------------------------------------------------------------------------------------------------------------------------------------------------------------------------------------------------------------------------------------|--------------------------------------------------------------------------------------------------------------------------------------------------------------------------------------------------------------------|
| <b>CVI : 1,0</b><br><b>Umformulierung (Einzelitem)</b><br>Berücksichtigter Kommentar:<br><ul style="list-style-type: none"> <li>„Aus meiner Sicht besser: Zittern oder Muskelzuckungen.“</li> </ul> <b>Itemverschiebung innerhalb des Fragenblocks</b><br>Berücksichtigter Kommentar:<br><ul style="list-style-type: none"> <li>„Aus meiner Sicht besser: Reihenfolge der Fragen 1a-d ändern.“</li> </ul> | <b>KI:</b><br><b>Umformulierung (Stammfrage)</b> <ul style="list-style-type: none"> <li>Konkordante Begrifflichkeit unterstützt Betroffene, Fragenblock 1 und 2 miteinander in Zusammenhang zu bringen.</li> </ul> |
|-----------------------------------------------------------------------------------------------------------------------------------------------------------------------------------------------------------------------------------------------------------------------------------------------------------------------------------------------------------------------------------------------------------|--------------------------------------------------------------------------------------------------------------------------------------------------------------------------------------------------------------------|

|                                                                       |                          |                          |                          |                          |                                                                       |                          |                          |                          |                          |                                                                                 |                          |                          |                          |                          |
|-----------------------------------------------------------------------|--------------------------|--------------------------|--------------------------|--------------------------|-----------------------------------------------------------------------|--------------------------|--------------------------|--------------------------|--------------------------|---------------------------------------------------------------------------------|--------------------------|--------------------------|--------------------------|--------------------------|
| <b>Version 1:</b><br><b>1b. Wie oft treten folgende Probleme auf?</b> |                          |                          |                          |                          | <b>Version 2:</b><br><b>1d. Wie oft treten folgende Probleme auf?</b> |                          |                          |                          |                          | <b>Version 3:</b><br><b>1d. Wie oft treten folgende <b>Beschwerden</b> auf?</b> |                          |                          |                          |                          |
| Unkoordinierte Bewegungen                                             |                          |                          |                          |                          | Unwillkürliche Bewegungen                                             |                          |                          |                          |                          | Unwillkürliche Bewegungen                                                       |                          |                          |                          |                          |
| nie                                                                   | selten                   | manchmal                 | häufig                   | immer                    | nie                                                                   | selten                   | manchmal                 | häufig                   | immer                    | nie                                                                             | selten                   | manchmal                 | häufig                   | immer                    |
| <input type="checkbox"/>                                              | <input type="checkbox"/> | <input type="checkbox"/> | <input type="checkbox"/> | <input type="checkbox"/> | <input type="checkbox"/>                                              | <input type="checkbox"/> | <input type="checkbox"/> | <input type="checkbox"/> | <input type="checkbox"/> | <input type="checkbox"/>                                                        | <input type="checkbox"/> | <input type="checkbox"/> | <input type="checkbox"/> | <input type="checkbox"/> |

|                                                                                                         |                                                  |
|---------------------------------------------------------------------------------------------------------|--------------------------------------------------|
| <b>CVI : 1,0</b><br><b>Umformulierung (Einzelitem) und Itemsplitting</b><br>Berücksichtigte Kommentare: | <b>KI:</b><br><b>Umformulierung (Stammfrage)</b> |
|---------------------------------------------------------------------------------------------------------|--------------------------------------------------|

|                                                                                                                                                                                                                                                                                                                                                                                                                                                     |                                                                                                                                                                   |
|-----------------------------------------------------------------------------------------------------------------------------------------------------------------------------------------------------------------------------------------------------------------------------------------------------------------------------------------------------------------------------------------------------------------------------------------------------|-------------------------------------------------------------------------------------------------------------------------------------------------------------------|
| <ul style="list-style-type: none"> <li>„Ich würde hier zwischen unwillkürlichen Bewegungen und Koordinationsstörungen unterscheiden (2 items).“</li> <li>„Unkoordiniert kann auch als unwillkürlich mißverstanden werden.“</li> </ul> <p><b>Itemverschiebung innerhalb des Fragenblocks</b></p> <p>Berücksichtigter Kommentar:</p> <ul style="list-style-type: none"> <li>„Aus meiner Sicht besser: Reihenfolge der Fragen 1a-d ändern.“</li> </ul> | <ul style="list-style-type: none"> <li>Konkordante Begrifflichkeit unterstützt Betroffene, Fragenblock 1 und 2 miteinander in Zusammenhang zu bringen.</li> </ul> |
|-----------------------------------------------------------------------------------------------------------------------------------------------------------------------------------------------------------------------------------------------------------------------------------------------------------------------------------------------------------------------------------------------------------------------------------------------------|-------------------------------------------------------------------------------------------------------------------------------------------------------------------|

| <b>Version 1:</b><br><b>Wie oft treten folgende Probleme</b><br><b>1b. auf?</b>                                                                                                                                                                                                                           | <b>Version 2:</b><br><b>Wie oft treten folgende Probleme</b><br><b>1e. auf?</b> | <b>Version 3:</b><br><b>Wie oft treten folgende <b>Beschwerden</b></b><br><b>1e. auf?</b> |                          |                          |       |                          |                          |                          |                          |                          |                                                                                                                                                                                                                                                                                                           |     |        |          |        |       |                          |                          |                          |                          |                          |                                                                                                                                                                                                                                                                                                           |     |        |          |        |       |                          |                          |                          |                          |                          |
|-----------------------------------------------------------------------------------------------------------------------------------------------------------------------------------------------------------------------------------------------------------------------------------------------------------|---------------------------------------------------------------------------------|-------------------------------------------------------------------------------------------|--------------------------|--------------------------|-------|--------------------------|--------------------------|--------------------------|--------------------------|--------------------------|-----------------------------------------------------------------------------------------------------------------------------------------------------------------------------------------------------------------------------------------------------------------------------------------------------------|-----|--------|----------|--------|-------|--------------------------|--------------------------|--------------------------|--------------------------|--------------------------|-----------------------------------------------------------------------------------------------------------------------------------------------------------------------------------------------------------------------------------------------------------------------------------------------------------|-----|--------|----------|--------|-------|--------------------------|--------------------------|--------------------------|--------------------------|--------------------------|
| Unkoordinierte Bewegungen                                                                                                                                                                                                                                                                                 | Ungezielte Bewegungen (Koordinationsstörungen)                                  | Ungezielte Bewegungen (Koordinationsstörungen)                                            |                          |                          |       |                          |                          |                          |                          |                          |                                                                                                                                                                                                                                                                                                           |     |        |          |        |       |                          |                          |                          |                          |                          |                                                                                                                                                                                                                                                                                                           |     |        |          |        |       |                          |                          |                          |                          |                          |
| <table border="1"> <tr> <th>nie</th> <th>selten</th> <th>manchmal</th> <th>häufig</th> <th>immer</th> </tr> <tr> <td><input type="checkbox"/></td> <td><input type="checkbox"/></td> <td><input type="checkbox"/></td> <td><input type="checkbox"/></td> <td><input type="checkbox"/></td> </tr> </table> | nie                                                                             | selten                                                                                    | manchmal                 | häufig                   | immer | <input type="checkbox"/> | <input type="checkbox"/> | <input type="checkbox"/> | <input type="checkbox"/> | <input type="checkbox"/> | <table border="1"> <tr> <th>nie</th> <th>selten</th> <th>manchmal</th> <th>häufig</th> <th>immer</th> </tr> <tr> <td><input type="checkbox"/></td> <td><input type="checkbox"/></td> <td><input type="checkbox"/></td> <td><input type="checkbox"/></td> <td><input type="checkbox"/></td> </tr> </table> | nie | selten | manchmal | häufig | immer | <input type="checkbox"/> | <input type="checkbox"/> | <input type="checkbox"/> | <input type="checkbox"/> | <input type="checkbox"/> | <table border="1"> <tr> <th>nie</th> <th>selten</th> <th>manchmal</th> <th>häufig</th> <th>immer</th> </tr> <tr> <td><input type="checkbox"/></td> <td><input type="checkbox"/></td> <td><input type="checkbox"/></td> <td><input type="checkbox"/></td> <td><input type="checkbox"/></td> </tr> </table> | nie | selten | manchmal | häufig | immer | <input type="checkbox"/> | <input type="checkbox"/> | <input type="checkbox"/> | <input type="checkbox"/> | <input type="checkbox"/> |
| nie                                                                                                                                                                                                                                                                                                       | selten                                                                          | manchmal                                                                                  | häufig                   | immer                    |       |                          |                          |                          |                          |                          |                                                                                                                                                                                                                                                                                                           |     |        |          |        |       |                          |                          |                          |                          |                          |                                                                                                                                                                                                                                                                                                           |     |        |          |        |       |                          |                          |                          |                          |                          |
| <input type="checkbox"/>                                                                                                                                                                                                                                                                                  | <input type="checkbox"/>                                                        | <input type="checkbox"/>                                                                  | <input type="checkbox"/> | <input type="checkbox"/> |       |                          |                          |                          |                          |                          |                                                                                                                                                                                                                                                                                                           |     |        |          |        |       |                          |                          |                          |                          |                          |                                                                                                                                                                                                                                                                                                           |     |        |          |        |       |                          |                          |                          |                          |                          |
| nie                                                                                                                                                                                                                                                                                                       | selten                                                                          | manchmal                                                                                  | häufig                   | immer                    |       |                          |                          |                          |                          |                          |                                                                                                                                                                                                                                                                                                           |     |        |          |        |       |                          |                          |                          |                          |                          |                                                                                                                                                                                                                                                                                                           |     |        |          |        |       |                          |                          |                          |                          |                          |
| <input type="checkbox"/>                                                                                                                                                                                                                                                                                  | <input type="checkbox"/>                                                        | <input type="checkbox"/>                                                                  | <input type="checkbox"/> | <input type="checkbox"/> |       |                          |                          |                          |                          |                          |                                                                                                                                                                                                                                                                                                           |     |        |          |        |       |                          |                          |                          |                          |                          |                                                                                                                                                                                                                                                                                                           |     |        |          |        |       |                          |                          |                          |                          |                          |
| nie                                                                                                                                                                                                                                                                                                       | selten                                                                          | manchmal                                                                                  | häufig                   | immer                    |       |                          |                          |                          |                          |                          |                                                                                                                                                                                                                                                                                                           |     |        |          |        |       |                          |                          |                          |                          |                          |                                                                                                                                                                                                                                                                                                           |     |        |          |        |       |                          |                          |                          |                          |                          |
| <input type="checkbox"/>                                                                                                                                                                                                                                                                                  | <input type="checkbox"/>                                                        | <input type="checkbox"/>                                                                  | <input type="checkbox"/> | <input type="checkbox"/> |       |                          |                          |                          |                          |                          |                                                                                                                                                                                                                                                                                                           |     |        |          |        |       |                          |                          |                          |                          |                          |                                                                                                                                                                                                                                                                                                           |     |        |          |        |       |                          |                          |                          |                          |                          |

|                                                                                                                                                                                                                                                                                                                                                                                                                                                                                                                                                                    |                                                                                                                                                                                                                               |
|--------------------------------------------------------------------------------------------------------------------------------------------------------------------------------------------------------------------------------------------------------------------------------------------------------------------------------------------------------------------------------------------------------------------------------------------------------------------------------------------------------------------------------------------------------------------|-------------------------------------------------------------------------------------------------------------------------------------------------------------------------------------------------------------------------------|
| <p><b>CVI : 1,0</b></p> <p><b>Umformulierung (Einzelitem) und Itemsplitting</b></p> <p>Berücksichtigte Kommentare:</p> <ul style="list-style-type: none"> <li>„Ich würde hier zwischen unwillkürlichen Bewegungen und Koordinationsstörungen unterscheiden (2 items).“</li> <li>„Aus meiner Sicht verständlicher: Ungezielte Bewegungen.“</li> </ul> <p><b>Itemverschiebung innerhalb des Fragenblocks</b></p> <p>Berücksichtigter Kommentar:</p> <ul style="list-style-type: none"> <li>„Aus meiner Sicht besser: Reihenfolge der Fragen 1a-d ändern.“</li> </ul> | <p><b>KI:</b></p> <p><b>Umformulierung (Stammfrage)</b></p> <ul style="list-style-type: none"> <li>Konkordante Begrifflichkeit unterstützt Betroffene, Fragenblock 1 und 2 miteinander in Zusammenhang zu bringen.</li> </ul> |
|--------------------------------------------------------------------------------------------------------------------------------------------------------------------------------------------------------------------------------------------------------------------------------------------------------------------------------------------------------------------------------------------------------------------------------------------------------------------------------------------------------------------------------------------------------------------|-------------------------------------------------------------------------------------------------------------------------------------------------------------------------------------------------------------------------------|

|  |  |                                                                                    |                          |                          |                          |                          |
|--|--|------------------------------------------------------------------------------------|--------------------------|--------------------------|--------------------------|--------------------------|
|  |  | <b>Version 3:</b><br><b>Wie oft treten folgende Beschwerden</b><br><b>1f. auf?</b> |                          |                          |                          |                          |
|  |  | <b>Bewegungsblockade oder -starre</b>                                              |                          |                          |                          |                          |
|  |  | nie                                                                                | selten                   | manchmal                 | häufig                   | immer                    |
|  |  | <input type="checkbox"/>                                                           | <input type="checkbox"/> | <input type="checkbox"/> | <input type="checkbox"/> | <input type="checkbox"/> |

|  |                                                                                                                                                                  |
|--|------------------------------------------------------------------------------------------------------------------------------------------------------------------|
|  | <b>KI:</b><br><b>Ergänzung (Einzelitem)</b> <ul style="list-style-type: none"> <li>Ergänzte Beschwerde im Rahmen einer funktionellen Bewegungsstörung</li> </ul> |
|--|------------------------------------------------------------------------------------------------------------------------------------------------------------------|

|                                                                                                                                                                                                      |                                                                                                                                                          |                                                                                                                                                             |                          |                          |                          |                          |                                                                                                                                                                                                                                                           |           |      |        |       |                          |                          |                          |                          |                                                                                                                                                                                                                                                                                                                 |           |      |        |       |            |                          |                          |                          |                          |                          |
|------------------------------------------------------------------------------------------------------------------------------------------------------------------------------------------------------|----------------------------------------------------------------------------------------------------------------------------------------------------------|-------------------------------------------------------------------------------------------------------------------------------------------------------------|--------------------------|--------------------------|--------------------------|--------------------------|-----------------------------------------------------------------------------------------------------------------------------------------------------------------------------------------------------------------------------------------------------------|-----------|------|--------|-------|--------------------------|--------------------------|--------------------------|--------------------------|-----------------------------------------------------------------------------------------------------------------------------------------------------------------------------------------------------------------------------------------------------------------------------------------------------------------|-----------|------|--------|-------|------------|--------------------------|--------------------------|--------------------------|--------------------------|--------------------------|
| <b>Version 1:</b><br><b>6e. Wie wirken sich folgende Probleme auf Ihre Bewegungsfähigkeit aus?</b><br>Minderbeweglichkeit<br>(z. B. Schwäche oder Ermüdbarkeit der Muskeln)                          | <b>Version 2:</b><br><b>2a. Fühlen Sie sich durch folgende Beschwerden beeinträchtigt, wenn Sie sich bewegen?</b><br><b>Muskelschwäche oder -lähmung</b> | <b>Version 3:</b><br><b>2a. Fühlen Sie sich im Alltag durch folgende Beschwerden beeinträchtigt, wenn Sie sich bewegen?</b><br>Muskelschwäche oder -lähmung |                          |                          |                          |                          |                                                                                                                                                                                                                                                           |           |      |        |       |                          |                          |                          |                          |                                                                                                                                                                                                                                                                                                                 |           |      |        |       |            |                          |                          |                          |                          |                          |
| <table border="1"> <tr> <td>Kaum</td> <td>mittel</td> <td>stark</td> </tr> <tr> <td><input type="checkbox"/></td> <td><input type="checkbox"/></td> <td><input type="checkbox"/></td> </tr> </table> | Kaum                                                                                                                                                     | mittel                                                                                                                                                      | stark                    | <input type="checkbox"/> | <input type="checkbox"/> | <input type="checkbox"/> | <table border="1"> <tr> <td>gar nicht</td> <td>kaum</td> <td>mittel</td> <td>stark</td> </tr> <tr> <td><input type="checkbox"/></td> <td><input type="checkbox"/></td> <td><input type="checkbox"/></td> <td><input type="checkbox"/></td> </tr> </table> | gar nicht | kaum | mittel | stark | <input type="checkbox"/> | <input type="checkbox"/> | <input type="checkbox"/> | <input type="checkbox"/> | <table border="1"> <tr> <td>gar nicht</td> <td>kaum</td> <td>mittel</td> <td>stark</td> <td>sehr stark</td> </tr> <tr> <td><input type="checkbox"/></td> <td><input type="checkbox"/></td> <td><input type="checkbox"/></td> <td><input type="checkbox"/></td> <td><input type="checkbox"/></td> </tr> </table> | gar nicht | kaum | mittel | stark | sehr stark | <input type="checkbox"/> | <input type="checkbox"/> | <input type="checkbox"/> | <input type="checkbox"/> | <input type="checkbox"/> |
| Kaum                                                                                                                                                                                                 | mittel                                                                                                                                                   | stark                                                                                                                                                       |                          |                          |                          |                          |                                                                                                                                                                                                                                                           |           |      |        |       |                          |                          |                          |                          |                                                                                                                                                                                                                                                                                                                 |           |      |        |       |            |                          |                          |                          |                          |                          |
| <input type="checkbox"/>                                                                                                                                                                             | <input type="checkbox"/>                                                                                                                                 | <input type="checkbox"/>                                                                                                                                    |                          |                          |                          |                          |                                                                                                                                                                                                                                                           |           |      |        |       |                          |                          |                          |                          |                                                                                                                                                                                                                                                                                                                 |           |      |        |       |            |                          |                          |                          |                          |                          |
| gar nicht                                                                                                                                                                                            | kaum                                                                                                                                                     | mittel                                                                                                                                                      | stark                    |                          |                          |                          |                                                                                                                                                                                                                                                           |           |      |        |       |                          |                          |                          |                          |                                                                                                                                                                                                                                                                                                                 |           |      |        |       |            |                          |                          |                          |                          |                          |
| <input type="checkbox"/>                                                                                                                                                                             | <input type="checkbox"/>                                                                                                                                 | <input type="checkbox"/>                                                                                                                                    | <input type="checkbox"/> |                          |                          |                          |                                                                                                                                                                                                                                                           |           |      |        |       |                          |                          |                          |                          |                                                                                                                                                                                                                                                                                                                 |           |      |        |       |            |                          |                          |                          |                          |                          |
| gar nicht                                                                                                                                                                                            | kaum                                                                                                                                                     | mittel                                                                                                                                                      | stark                    | sehr stark               |                          |                          |                                                                                                                                                                                                                                                           |           |      |        |       |                          |                          |                          |                          |                                                                                                                                                                                                                                                                                                                 |           |      |        |       |            |                          |                          |                          |                          |                          |
| <input type="checkbox"/>                                                                                                                                                                             | <input type="checkbox"/>                                                                                                                                 | <input type="checkbox"/>                                                                                                                                    | <input type="checkbox"/> | <input type="checkbox"/> |                          |                          |                                                                                                                                                                                                                                                           |           |      |        |       |                          |                          |                          |                          |                                                                                                                                                                                                                                                                                                                 |           |      |        |       |            |                          |                          |                          |                          |                          |

|                                                                                                                                                                                                                                                                                                                                                                                                                                                                                                        |                                                                                                                                                                                                                                                                                                                                                                                                                                                                                                                                                                                          |
|--------------------------------------------------------------------------------------------------------------------------------------------------------------------------------------------------------------------------------------------------------------------------------------------------------------------------------------------------------------------------------------------------------------------------------------------------------------------------------------------------------|------------------------------------------------------------------------------------------------------------------------------------------------------------------------------------------------------------------------------------------------------------------------------------------------------------------------------------------------------------------------------------------------------------------------------------------------------------------------------------------------------------------------------------------------------------------------------------------|
| <b>CVI : 1,0</b><br><b>Umformulierung (Stammfrage)</b><br>Berücksichtigte Kommentare: <ul style="list-style-type: none"> <li>„Aus meiner Sicht klarerer Info: Fühlen sie sich durch folgende Beschwerden beeinträchtigt: Gar nicht, kaum, mittel, stark.“</li> <li>„Hier sollte das Wording mit Sektion 1 konkordant sein (Also Lähmungen, Unwillkürliche Bewegungen, Koordinationsstörungen).“</li> </ul> <b>Verschiebung der Stammfrage innerhalb des Fragebogens</b><br>Berücksichtigter Kommentar: | <b>KI:</b><br><b>Umformulierung und Unterstreichung (Stammfrage)</b> <ul style="list-style-type: none"> <li>Ergänzung „im Alltag“ verdeutlicht den Kontext, in dem die Beeinträchtigung durch die Bewegungsstörung beurteilt werden soll.</li> <li>Unterstreichung unterstützt Betroffene, die Beeinträchtigung konsequent auf ihre Bewegungsfähigkeit zu beziehen.</li> </ul> <b>Ergänzung (Antwortmöglichkeit)</b> <ul style="list-style-type: none"> <li>Ergänzung „sehr stark“ ermöglicht den Betroffenen eine weitere Differenzierung zwischen „stark“ und „sehr stark“.</li> </ul> |
|--------------------------------------------------------------------------------------------------------------------------------------------------------------------------------------------------------------------------------------------------------------------------------------------------------------------------------------------------------------------------------------------------------------------------------------------------------------------------------------------------------|------------------------------------------------------------------------------------------------------------------------------------------------------------------------------------------------------------------------------------------------------------------------------------------------------------------------------------------------------------------------------------------------------------------------------------------------------------------------------------------------------------------------------------------------------------------------------------------|

- „Man könnte die Punkte die unter 6 stehen als eine Ergänzung der Punkte 1a-d für den Schweregrad ansehen.“

|                          |                                                                                                                                                                                                                                                                                                                                                                                    |                                                                                                                                    |                          |                          |       |                          |                          |                          |                          |                                                                                                                                                                                                                                                                                                                                                                                                                                                                     |           |      |        |       |                   |                          |                          |                          |                          |                          |
|--------------------------|------------------------------------------------------------------------------------------------------------------------------------------------------------------------------------------------------------------------------------------------------------------------------------------------------------------------------------------------------------------------------------|------------------------------------------------------------------------------------------------------------------------------------|--------------------------|--------------------------|-------|--------------------------|--------------------------|--------------------------|--------------------------|---------------------------------------------------------------------------------------------------------------------------------------------------------------------------------------------------------------------------------------------------------------------------------------------------------------------------------------------------------------------------------------------------------------------------------------------------------------------|-----------|------|--------|-------|-------------------|--------------------------|--------------------------|--------------------------|--------------------------|--------------------------|
|                          | <b>Version 2:</b><br>Fühlen Sie sich durch folgende Beschwerden beeinträchtigt, wenn Sie sich <b>2b.</b> bewegen?                                                                                                                                                                                                                                                                  | <b>Version 3:</b><br>Fühlen Sie sich <b>im Alltag</b> durch folgende Beschwerden beeinträchtigt, <b>wenn Sie sich 2b. bewegen?</b> |                          |                          |       |                          |                          |                          |                          |                                                                                                                                                                                                                                                                                                                                                                                                                                                                     |           |      |        |       |                   |                          |                          |                          |                          |                          |
|                          | Muskelverkrampfung                                                                                                                                                                                                                                                                                                                                                                 | Muskelverkrampfung                                                                                                                 |                          |                          |       |                          |                          |                          |                          |                                                                                                                                                                                                                                                                                                                                                                                                                                                                     |           |      |        |       |                   |                          |                          |                          |                          |                          |
|                          | <table border="1" style="width: 100%; text-align: center;"> <tr> <td style="width: 25%;">gar nicht</td> <td style="width: 25%;">kaum</td> <td style="width: 25%;">mittel</td> <td style="width: 25%;">stark</td> </tr> <tr> <td><input type="checkbox"/></td> <td><input type="checkbox"/></td> <td><input type="checkbox"/></td> <td><input type="checkbox"/></td> </tr> </table> | gar nicht                                                                                                                          | kaum                     | mittel                   | stark | <input type="checkbox"/> | <input type="checkbox"/> | <input type="checkbox"/> | <input type="checkbox"/> | <table border="1" style="width: 100%; text-align: center;"> <tr> <td style="width: 20%;">gar nicht</td> <td style="width: 20%;">kaum</td> <td style="width: 20%;">mittel</td> <td style="width: 20%;">stark</td> <td style="width: 20%;"><b>sehr stark</b></td> </tr> <tr> <td><input type="checkbox"/></td> <td><input type="checkbox"/></td> <td><input type="checkbox"/></td> <td><input type="checkbox"/></td> <td><input type="checkbox"/></td> </tr> </table> | gar nicht | kaum | mittel | stark | <b>sehr stark</b> | <input type="checkbox"/> | <input type="checkbox"/> | <input type="checkbox"/> | <input type="checkbox"/> | <input type="checkbox"/> |
| gar nicht                | kaum                                                                                                                                                                                                                                                                                                                                                                               | mittel                                                                                                                             | stark                    |                          |       |                          |                          |                          |                          |                                                                                                                                                                                                                                                                                                                                                                                                                                                                     |           |      |        |       |                   |                          |                          |                          |                          |                          |
| <input type="checkbox"/> | <input type="checkbox"/>                                                                                                                                                                                                                                                                                                                                                           | <input type="checkbox"/>                                                                                                           | <input type="checkbox"/> |                          |       |                          |                          |                          |                          |                                                                                                                                                                                                                                                                                                                                                                                                                                                                     |           |      |        |       |                   |                          |                          |                          |                          |                          |
| gar nicht                | kaum                                                                                                                                                                                                                                                                                                                                                                               | mittel                                                                                                                             | stark                    | <b>sehr stark</b>        |       |                          |                          |                          |                          |                                                                                                                                                                                                                                                                                                                                                                                                                                                                     |           |      |        |       |                   |                          |                          |                          |                          |                          |
| <input type="checkbox"/> | <input type="checkbox"/>                                                                                                                                                                                                                                                                                                                                                           | <input type="checkbox"/>                                                                                                           | <input type="checkbox"/> | <input type="checkbox"/> |       |                          |                          |                          |                          |                                                                                                                                                                                                                                                                                                                                                                                                                                                                     |           |      |        |       |                   |                          |                          |                          |                          |                          |

|                                                                                                                                                                                                                             |                                                                                                                                                                                                                                                                                                                                                                                                                                                                                                                                                                                                |
|-----------------------------------------------------------------------------------------------------------------------------------------------------------------------------------------------------------------------------|------------------------------------------------------------------------------------------------------------------------------------------------------------------------------------------------------------------------------------------------------------------------------------------------------------------------------------------------------------------------------------------------------------------------------------------------------------------------------------------------------------------------------------------------------------------------------------------------|
| <b>Ergänzung (Einzelitem)</b><br>Berücksichtigter Kommentar: <ul style="list-style-type: none"> <li>• „Man könnte die Punkte die unter 6 stehen als eine Ergänzung der Punkte 1a-d für den Schweregrad ansehen.“</li> </ul> | <b>KI:</b><br><b>Umformulierung und Unterstreichung (Stammfrage)</b> <ul style="list-style-type: none"> <li>• Ergänzung „im Alltag“ verdeutlicht den Kontext, in dem die Beeinträchtigung durch die Bewegungsstörung beurteilt werden soll.</li> <li>• Unterstreichung unterstützt Betroffene, die Beeinträchtigung konsequent auf ihre Bewegungsfähigkeit zu beziehen.</li> </ul> <b>Ergänzung (Antwortmöglichkeit)</b> <ul style="list-style-type: none"> <li>• Ergänzung „sehr stark“ ermöglicht den Betroffenen eine weitere Differenzierung zwischen „stark“ und „sehr stark“.</li> </ul> |
|-----------------------------------------------------------------------------------------------------------------------------------------------------------------------------------------------------------------------------|------------------------------------------------------------------------------------------------------------------------------------------------------------------------------------------------------------------------------------------------------------------------------------------------------------------------------------------------------------------------------------------------------------------------------------------------------------------------------------------------------------------------------------------------------------------------------------------------|

|                          |                                                                                                                                                                                                                                                                                                                                                                                    |                                                                                                                                    |                          |                          |       |                          |                          |                          |                          |                                                                                                                                                                                                                                                                                                                                                                                                                                                                     |           |      |        |       |                   |                          |                          |                          |                          |                          |
|--------------------------|------------------------------------------------------------------------------------------------------------------------------------------------------------------------------------------------------------------------------------------------------------------------------------------------------------------------------------------------------------------------------------|------------------------------------------------------------------------------------------------------------------------------------|--------------------------|--------------------------|-------|--------------------------|--------------------------|--------------------------|--------------------------|---------------------------------------------------------------------------------------------------------------------------------------------------------------------------------------------------------------------------------------------------------------------------------------------------------------------------------------------------------------------------------------------------------------------------------------------------------------------|-----------|------|--------|-------|-------------------|--------------------------|--------------------------|--------------------------|--------------------------|--------------------------|
|                          | <b>Version 2:</b><br>Fühlen Sie sich durch folgende Beschwerden beeinträchtigt, wenn Sie sich <b>2c.</b> bewegen?                                                                                                                                                                                                                                                                  | <b>Version 3:</b><br>Fühlen Sie sich <b>im Alltag</b> durch folgende Beschwerden beeinträchtigt, <b>wenn Sie sich 2c. bewegen?</b> |                          |                          |       |                          |                          |                          |                          |                                                                                                                                                                                                                                                                                                                                                                                                                                                                     |           |      |        |       |                   |                          |                          |                          |                          |                          |
|                          | Zittern oder Muskelzuckungen                                                                                                                                                                                                                                                                                                                                                       | Zittern oder Muskelzuckungen                                                                                                       |                          |                          |       |                          |                          |                          |                          |                                                                                                                                                                                                                                                                                                                                                                                                                                                                     |           |      |        |       |                   |                          |                          |                          |                          |                          |
|                          | <table border="1" style="width: 100%; text-align: center;"> <tr> <td style="width: 25%;">gar nicht</td> <td style="width: 25%;">kaum</td> <td style="width: 25%;">mittel</td> <td style="width: 25%;">stark</td> </tr> <tr> <td><input type="checkbox"/></td> <td><input type="checkbox"/></td> <td><input type="checkbox"/></td> <td><input type="checkbox"/></td> </tr> </table> | gar nicht                                                                                                                          | kaum                     | mittel                   | stark | <input type="checkbox"/> | <input type="checkbox"/> | <input type="checkbox"/> | <input type="checkbox"/> | <table border="1" style="width: 100%; text-align: center;"> <tr> <td style="width: 20%;">gar nicht</td> <td style="width: 20%;">kaum</td> <td style="width: 20%;">mittel</td> <td style="width: 20%;">stark</td> <td style="width: 20%;"><b>sehr stark</b></td> </tr> <tr> <td><input type="checkbox"/></td> <td><input type="checkbox"/></td> <td><input type="checkbox"/></td> <td><input type="checkbox"/></td> <td><input type="checkbox"/></td> </tr> </table> | gar nicht | kaum | mittel | stark | <b>sehr stark</b> | <input type="checkbox"/> | <input type="checkbox"/> | <input type="checkbox"/> | <input type="checkbox"/> | <input type="checkbox"/> |
| gar nicht                | kaum                                                                                                                                                                                                                                                                                                                                                                               | mittel                                                                                                                             | stark                    |                          |       |                          |                          |                          |                          |                                                                                                                                                                                                                                                                                                                                                                                                                                                                     |           |      |        |       |                   |                          |                          |                          |                          |                          |
| <input type="checkbox"/> | <input type="checkbox"/>                                                                                                                                                                                                                                                                                                                                                           | <input type="checkbox"/>                                                                                                           | <input type="checkbox"/> |                          |       |                          |                          |                          |                          |                                                                                                                                                                                                                                                                                                                                                                                                                                                                     |           |      |        |       |                   |                          |                          |                          |                          |                          |
| gar nicht                | kaum                                                                                                                                                                                                                                                                                                                                                                               | mittel                                                                                                                             | stark                    | <b>sehr stark</b>        |       |                          |                          |                          |                          |                                                                                                                                                                                                                                                                                                                                                                                                                                                                     |           |      |        |       |                   |                          |                          |                          |                          |                          |
| <input type="checkbox"/> | <input type="checkbox"/>                                                                                                                                                                                                                                                                                                                                                           | <input type="checkbox"/>                                                                                                           | <input type="checkbox"/> | <input type="checkbox"/> |       |                          |                          |                          |                          |                                                                                                                                                                                                                                                                                                                                                                                                                                                                     |           |      |        |       |                   |                          |                          |                          |                          |                          |

|                                                                                                                                                                                                                                   |                                                                                                                                                                                                                                                                                                                                                                                                                                                                                                                                                                                                         |
|-----------------------------------------------------------------------------------------------------------------------------------------------------------------------------------------------------------------------------------|---------------------------------------------------------------------------------------------------------------------------------------------------------------------------------------------------------------------------------------------------------------------------------------------------------------------------------------------------------------------------------------------------------------------------------------------------------------------------------------------------------------------------------------------------------------------------------------------------------|
| <p><b>Ergänzung (Einzelitem)</b><br/>Berücksichtigter Kommentar:</p> <ul style="list-style-type: none"> <li>„Man könnte die Punkte die unter 6 stehen als eine Ergänzung der Punkte 1a-d für den Schweregrad ansehen.“</li> </ul> | <p><b>KI:</b><br/><b>Umformulierung und Unterstreichung (Stammfrage)</b></p> <ul style="list-style-type: none"> <li>Ergänzung „im Alltag“ verdeutlicht den Kontext, in dem die Beeinträchtigung durch die Bewegungsstörung beurteilt werden soll.</li> <li>Unterstreichung unterstützt Betroffene, die Beeinträchtigung konsequent auf ihre Bewegungsfähigkeit zu beziehen.</li> </ul> <p><b>Ergänzung (Antwortmöglichkeit)</b></p> <ul style="list-style-type: none"> <li>Ergänzung „sehr stark“ ermöglicht den Betroffenen eine weitere Differenzierung zwischen „stark“ und „sehr stark“.</li> </ul> |
|-----------------------------------------------------------------------------------------------------------------------------------------------------------------------------------------------------------------------------------|---------------------------------------------------------------------------------------------------------------------------------------------------------------------------------------------------------------------------------------------------------------------------------------------------------------------------------------------------------------------------------------------------------------------------------------------------------------------------------------------------------------------------------------------------------------------------------------------------------|

|                                                                                                                                                                                                                                                                                                           |                                                                                                                |                                                                                                                          |                          |                          |                          |                          |                                                                                                                                                                                                                                                                                                                                                                                    |           |      |        |       |                          |                          |                          |                          |                                                                                                                                                                                                                                                                                                                                                                                                                                                              |           |      |        |       |            |                          |                          |                          |                          |                          |
|-----------------------------------------------------------------------------------------------------------------------------------------------------------------------------------------------------------------------------------------------------------------------------------------------------------|----------------------------------------------------------------------------------------------------------------|--------------------------------------------------------------------------------------------------------------------------|--------------------------|--------------------------|--------------------------|--------------------------|------------------------------------------------------------------------------------------------------------------------------------------------------------------------------------------------------------------------------------------------------------------------------------------------------------------------------------------------------------------------------------|-----------|------|--------|-------|--------------------------|--------------------------|--------------------------|--------------------------|--------------------------------------------------------------------------------------------------------------------------------------------------------------------------------------------------------------------------------------------------------------------------------------------------------------------------------------------------------------------------------------------------------------------------------------------------------------|-----------|------|--------|-------|------------|--------------------------|--------------------------|--------------------------|--------------------------|--------------------------|
| <p><b>Version 1:</b><br/>Wie wirken sich folgende Probleme auf Ihre Bewegungsfähigkeit aus?</p>                                                                                                                                                                                                           | <p><b>Version 2:</b><br/>Fühlen Sie sich durch folgende Beschwerden beeinträchtigt, wenn Sie sich bewegen?</p> | <p><b>Version 3:</b><br/>Fühlen Sie sich im Alltag durch folgende Beschwerden beeinträchtigt, wenn Sie sich bewegen?</p> |                          |                          |                          |                          |                                                                                                                                                                                                                                                                                                                                                                                    |           |      |        |       |                          |                          |                          |                          |                                                                                                                                                                                                                                                                                                                                                                                                                                                              |           |      |        |       |            |                          |                          |                          |                          |                          |
| <p>6d. Unwillkürliche Bewegungen (z. B. Zittern oder Zuckungen)</p>                                                                                                                                                                                                                                       | <p>2d. Unwillkürliche Bewegungen</p>                                                                           | <p>2d. Unwillkürliche Bewegungen</p>                                                                                     |                          |                          |                          |                          |                                                                                                                                                                                                                                                                                                                                                                                    |           |      |        |       |                          |                          |                          |                          |                                                                                                                                                                                                                                                                                                                                                                                                                                                              |           |      |        |       |            |                          |                          |                          |                          |                          |
| <table border="1" style="width: 100%; text-align: center;"> <tr> <td style="width: 33%;">kaum</td> <td style="width: 33%;">mittel</td> <td style="width: 33%;">stark</td> </tr> <tr> <td><input type="checkbox"/></td> <td><input type="checkbox"/></td> <td><input type="checkbox"/></td> </tr> </table> | kaum                                                                                                           | mittel                                                                                                                   | stark                    | <input type="checkbox"/> | <input type="checkbox"/> | <input type="checkbox"/> | <table border="1" style="width: 100%; text-align: center;"> <tr> <td style="width: 25%;">gar nicht</td> <td style="width: 25%;">kaum</td> <td style="width: 25%;">mittel</td> <td style="width: 25%;">stark</td> </tr> <tr> <td><input type="checkbox"/></td> <td><input type="checkbox"/></td> <td><input type="checkbox"/></td> <td><input type="checkbox"/></td> </tr> </table> | gar nicht | kaum | mittel | stark | <input type="checkbox"/> | <input type="checkbox"/> | <input type="checkbox"/> | <input type="checkbox"/> | <table border="1" style="width: 100%; text-align: center;"> <tr> <td style="width: 20%;">gar nicht</td> <td style="width: 20%;">kaum</td> <td style="width: 20%;">mittel</td> <td style="width: 20%;">stark</td> <td style="width: 20%;">sehr stark</td> </tr> <tr> <td><input type="checkbox"/></td> <td><input type="checkbox"/></td> <td><input type="checkbox"/></td> <td><input type="checkbox"/></td> <td><input type="checkbox"/></td> </tr> </table> | gar nicht | kaum | mittel | stark | sehr stark | <input type="checkbox"/> | <input type="checkbox"/> | <input type="checkbox"/> | <input type="checkbox"/> | <input type="checkbox"/> |
| kaum                                                                                                                                                                                                                                                                                                      | mittel                                                                                                         | stark                                                                                                                    |                          |                          |                          |                          |                                                                                                                                                                                                                                                                                                                                                                                    |           |      |        |       |                          |                          |                          |                          |                                                                                                                                                                                                                                                                                                                                                                                                                                                              |           |      |        |       |            |                          |                          |                          |                          |                          |
| <input type="checkbox"/>                                                                                                                                                                                                                                                                                  | <input type="checkbox"/>                                                                                       | <input type="checkbox"/>                                                                                                 |                          |                          |                          |                          |                                                                                                                                                                                                                                                                                                                                                                                    |           |      |        |       |                          |                          |                          |                          |                                                                                                                                                                                                                                                                                                                                                                                                                                                              |           |      |        |       |            |                          |                          |                          |                          |                          |
| gar nicht                                                                                                                                                                                                                                                                                                 | kaum                                                                                                           | mittel                                                                                                                   | stark                    |                          |                          |                          |                                                                                                                                                                                                                                                                                                                                                                                    |           |      |        |       |                          |                          |                          |                          |                                                                                                                                                                                                                                                                                                                                                                                                                                                              |           |      |        |       |            |                          |                          |                          |                          |                          |
| <input type="checkbox"/>                                                                                                                                                                                                                                                                                  | <input type="checkbox"/>                                                                                       | <input type="checkbox"/>                                                                                                 | <input type="checkbox"/> |                          |                          |                          |                                                                                                                                                                                                                                                                                                                                                                                    |           |      |        |       |                          |                          |                          |                          |                                                                                                                                                                                                                                                                                                                                                                                                                                                              |           |      |        |       |            |                          |                          |                          |                          |                          |
| gar nicht                                                                                                                                                                                                                                                                                                 | kaum                                                                                                           | mittel                                                                                                                   | stark                    | sehr stark               |                          |                          |                                                                                                                                                                                                                                                                                                                                                                                    |           |      |        |       |                          |                          |                          |                          |                                                                                                                                                                                                                                                                                                                                                                                                                                                              |           |      |        |       |            |                          |                          |                          |                          |                          |
| <input type="checkbox"/>                                                                                                                                                                                                                                                                                  | <input type="checkbox"/>                                                                                       | <input type="checkbox"/>                                                                                                 | <input type="checkbox"/> | <input type="checkbox"/> |                          |                          |                                                                                                                                                                                                                                                                                                                                                                                    |           |      |        |       |                          |                          |                          |                          |                                                                                                                                                                                                                                                                                                                                                                                                                                                              |           |      |        |       |            |                          |                          |                          |                          |                          |

|                                                                                                                                                                                                                                                                                                                                                                                                                                                                                                                                                                                                                                                                                 |                                                                                                                                                                                                                                                                                                                                                                                                                                                                                                                                                                                                         |
|---------------------------------------------------------------------------------------------------------------------------------------------------------------------------------------------------------------------------------------------------------------------------------------------------------------------------------------------------------------------------------------------------------------------------------------------------------------------------------------------------------------------------------------------------------------------------------------------------------------------------------------------------------------------------------|---------------------------------------------------------------------------------------------------------------------------------------------------------------------------------------------------------------------------------------------------------------------------------------------------------------------------------------------------------------------------------------------------------------------------------------------------------------------------------------------------------------------------------------------------------------------------------------------------------|
| <p><b>CVI : 1,0</b><br/><b>Umformulierung (Stammfrage und Einzelitem)</b><br/>Berücksichtigte Kommentare:</p> <ul style="list-style-type: none"> <li>„Aus meiner Sicht klarerer Info: Fühlen sie sich durch folgende Beschwerden beeinträchtigt: Gar nicht, kaum, mittel, stark.“</li> <li>„Hier sollte das Wording mit Sektion 1 konkordant sein (Also Lähmungen, Unwillkürliche Bewegungen,...).“</li> </ul> <p><b>Verschiebung der Stammfrage innerhalb des Fragebogens</b><br/>Berücksichtigter Kommentar:</p> <ul style="list-style-type: none"> <li>„Man könnte die Punkte die unter 6 stehen als eine Ergänzung der Punkte 1a-d für den Schweregrad ansehen.“</li> </ul> | <p><b>KI:</b><br/><b>Umformulierung und Unterstreichung (Stammfrage)</b></p> <ul style="list-style-type: none"> <li>Ergänzung „im Alltag“ verdeutlicht den Kontext, in dem die Beeinträchtigung durch die Bewegungsstörung beurteilt werden soll.</li> <li>Unterstreichung unterstützt Betroffene, die Beeinträchtigung konsequent auf ihre Bewegungsfähigkeit zu beziehen.</li> </ul> <p><b>Ergänzung (Antwortmöglichkeit)</b></p> <ul style="list-style-type: none"> <li>Ergänzung „sehr stark“ ermöglicht den Betroffenen eine weitere Differenzierung zwischen „stark“ und „sehr stark“.</li> </ul> |
|---------------------------------------------------------------------------------------------------------------------------------------------------------------------------------------------------------------------------------------------------------------------------------------------------------------------------------------------------------------------------------------------------------------------------------------------------------------------------------------------------------------------------------------------------------------------------------------------------------------------------------------------------------------------------------|---------------------------------------------------------------------------------------------------------------------------------------------------------------------------------------------------------------------------------------------------------------------------------------------------------------------------------------------------------------------------------------------------------------------------------------------------------------------------------------------------------------------------------------------------------------------------------------------------------|

|                          |                                                                                                                                                                                                                                                                                                                                                                                                                                               |                          |                          |                          |       |                          |                          |                          |                          |                                                                                                                                                                                                                                                                                                                                                                                                                                                                                                                                    |           |      |        |       |                   |                          |                          |                          |                          |                          |
|--------------------------|-----------------------------------------------------------------------------------------------------------------------------------------------------------------------------------------------------------------------------------------------------------------------------------------------------------------------------------------------------------------------------------------------------------------------------------------------|--------------------------|--------------------------|--------------------------|-------|--------------------------|--------------------------|--------------------------|--------------------------|------------------------------------------------------------------------------------------------------------------------------------------------------------------------------------------------------------------------------------------------------------------------------------------------------------------------------------------------------------------------------------------------------------------------------------------------------------------------------------------------------------------------------------|-----------|------|--------|-------|-------------------|--------------------------|--------------------------|--------------------------|--------------------------|--------------------------|
|                          | <p><b>Version 2:</b><br/>Fühlen Sie sich durch folgende Beschwerden beeinträchtigt, wenn Sie sich <b>2e.</b> bewegen?</p> <p>Ungezielte Bewegungen<br/>(Koordinationsstörungen)</p> <table border="1"> <tr> <td>gar nicht</td> <td>kaum</td> <td>mittel</td> <td>stark</td> </tr> <tr> <td><input type="checkbox"/></td> <td><input type="checkbox"/></td> <td><input type="checkbox"/></td> <td><input type="checkbox"/></td> </tr> </table> | gar nicht                | kaum                     | mittel                   | stark | <input type="checkbox"/> | <input type="checkbox"/> | <input type="checkbox"/> | <input type="checkbox"/> | <p><b>Version 3:</b><br/>Fühlen Sie sich <b>im Alltag</b> durch folgende Beschwerden beeinträchtigt, <b>wenn Sie sich 2e.</b> <b>bewegen?</b></p> <p>Ungezielte Bewegungen<br/>(Koordinationsstörungen)</p> <table border="1"> <tr> <td>gar nicht</td> <td>kaum</td> <td>mittel</td> <td>stark</td> <td><b>sehr stark</b></td> </tr> <tr> <td><input type="checkbox"/></td> <td><input type="checkbox"/></td> <td><input type="checkbox"/></td> <td><input type="checkbox"/></td> <td><input type="checkbox"/></td> </tr> </table> | gar nicht | kaum | mittel | stark | <b>sehr stark</b> | <input type="checkbox"/> | <input type="checkbox"/> | <input type="checkbox"/> | <input type="checkbox"/> | <input type="checkbox"/> |
| gar nicht                | kaum                                                                                                                                                                                                                                                                                                                                                                                                                                          | mittel                   | stark                    |                          |       |                          |                          |                          |                          |                                                                                                                                                                                                                                                                                                                                                                                                                                                                                                                                    |           |      |        |       |                   |                          |                          |                          |                          |                          |
| <input type="checkbox"/> | <input type="checkbox"/>                                                                                                                                                                                                                                                                                                                                                                                                                      | <input type="checkbox"/> | <input type="checkbox"/> |                          |       |                          |                          |                          |                          |                                                                                                                                                                                                                                                                                                                                                                                                                                                                                                                                    |           |      |        |       |                   |                          |                          |                          |                          |                          |
| gar nicht                | kaum                                                                                                                                                                                                                                                                                                                                                                                                                                          | mittel                   | stark                    | <b>sehr stark</b>        |       |                          |                          |                          |                          |                                                                                                                                                                                                                                                                                                                                                                                                                                                                                                                                    |           |      |        |       |                   |                          |                          |                          |                          |                          |
| <input type="checkbox"/> | <input type="checkbox"/>                                                                                                                                                                                                                                                                                                                                                                                                                      | <input type="checkbox"/> | <input type="checkbox"/> | <input type="checkbox"/> |       |                          |                          |                          |                          |                                                                                                                                                                                                                                                                                                                                                                                                                                                                                                                                    |           |      |        |       |                   |                          |                          |                          |                          |                          |

|                                                                                                                                                                                                                                   |                                                                                                                                                                                                                                                                                                                                                                                                                                                                                                                                                                                                         |
|-----------------------------------------------------------------------------------------------------------------------------------------------------------------------------------------------------------------------------------|---------------------------------------------------------------------------------------------------------------------------------------------------------------------------------------------------------------------------------------------------------------------------------------------------------------------------------------------------------------------------------------------------------------------------------------------------------------------------------------------------------------------------------------------------------------------------------------------------------|
| <p><b>Ergänzung (Einzelitem)</b><br/>Berücksichtigter Kommentar:</p> <ul style="list-style-type: none"> <li>„Man könnte die Punkte die unter 6 stehen als eine Ergänzung der Punkte 1a-d für den Schweregrad ansehen.“</li> </ul> | <p><b>KI:</b><br/><b>Umformulierung und Unterstreichung (Stammfrage)</b></p> <ul style="list-style-type: none"> <li>Ergänzung „im Alltag“ verdeutlicht den Kontext, in dem die Beeinträchtigung durch die Bewegungsstörung beurteilt werden soll.</li> <li>Unterstreichung unterstützt Betroffene, die Beeinträchtigung konsequent auf ihre Bewegungsfähigkeit zu beziehen.</li> </ul> <p><b>Ergänzung (Antwortmöglichkeit)</b></p> <ul style="list-style-type: none"> <li>Ergänzung „sehr stark“ ermöglicht den Betroffenen eine weitere Differenzierung zwischen „stark“ und „sehr stark“.</li> </ul> |
|-----------------------------------------------------------------------------------------------------------------------------------------------------------------------------------------------------------------------------------|---------------------------------------------------------------------------------------------------------------------------------------------------------------------------------------------------------------------------------------------------------------------------------------------------------------------------------------------------------------------------------------------------------------------------------------------------------------------------------------------------------------------------------------------------------------------------------------------------------|

|                          |                                                                                                                                                                                                                                                                                                                                                                                                                                                                                                   |                          |                          |                          |        |       |                          |                          |                          |                          |                          |
|--------------------------|---------------------------------------------------------------------------------------------------------------------------------------------------------------------------------------------------------------------------------------------------------------------------------------------------------------------------------------------------------------------------------------------------------------------------------------------------------------------------------------------------|--------------------------|--------------------------|--------------------------|--------|-------|--------------------------|--------------------------|--------------------------|--------------------------|--------------------------|
|                          | <p><b>Version 3:</b><br/>Fühlen Sie sich im Alltag durch folgende Beschwerden beeinträchtigt, <b>2f.</b> <b>wenn Sie sich bewegen?</b></p> <p><b>Bewegungsblockade oder -starre</b></p> <table border="1"> <tr> <td>nie</td> <td>selten</td> <td>manchmal</td> <td>häufig</td> <td>immer</td> </tr> <tr> <td><input type="checkbox"/></td> <td><input type="checkbox"/></td> <td><input type="checkbox"/></td> <td><input type="checkbox"/></td> <td><input type="checkbox"/></td> </tr> </table> | nie                      | selten                   | manchmal                 | häufig | immer | <input type="checkbox"/> | <input type="checkbox"/> | <input type="checkbox"/> | <input type="checkbox"/> | <input type="checkbox"/> |
| nie                      | selten                                                                                                                                                                                                                                                                                                                                                                                                                                                                                            | manchmal                 | häufig                   | immer                    |        |       |                          |                          |                          |                          |                          |
| <input type="checkbox"/> | <input type="checkbox"/>                                                                                                                                                                                                                                                                                                                                                                                                                                                                          | <input type="checkbox"/> | <input type="checkbox"/> | <input type="checkbox"/> |        |       |                          |                          |                          |                          |                          |



|  |                                                                                                                                                                  |
|--|------------------------------------------------------------------------------------------------------------------------------------------------------------------|
|  | <b>KI:</b><br><b>Ergänzung (Einzelitem)</b> <ul style="list-style-type: none"> <li>Ergänzte Beschwerde im Rahmen einer funktionellen Bewegungsstörung</li> </ul> |
|--|------------------------------------------------------------------------------------------------------------------------------------------------------------------|

| <b>Version 1:</b><br><b>2a. Welche Körperteile sind betroffen?</b>                                                                                                                                                                                                                                        | <b>Version 2:</b><br><b>Wie häufig sind folgende Körperteile betroffen?</b> | <b>Version 3:</b><br><b>Wie häufig sind folgende Körperteile <u>von</u> Ihrer Bewegungsstörung betroffen?</b> |                          |                          |       |                          |                          |                          |                          |                          |                                                                                                                                                                                                                                                                                                           |     |        |          |        |       |                          |                          |                          |                          |                          |                                                                                                                                                                                                                                                                                                           |     |        |          |        |       |                          |                          |                          |                          |                          |
|-----------------------------------------------------------------------------------------------------------------------------------------------------------------------------------------------------------------------------------------------------------------------------------------------------------|-----------------------------------------------------------------------------|---------------------------------------------------------------------------------------------------------------|--------------------------|--------------------------|-------|--------------------------|--------------------------|--------------------------|--------------------------|--------------------------|-----------------------------------------------------------------------------------------------------------------------------------------------------------------------------------------------------------------------------------------------------------------------------------------------------------|-----|--------|----------|--------|-------|--------------------------|--------------------------|--------------------------|--------------------------|--------------------------|-----------------------------------------------------------------------------------------------------------------------------------------------------------------------------------------------------------------------------------------------------------------------------------------------------------|-----|--------|----------|--------|-------|--------------------------|--------------------------|--------------------------|--------------------------|--------------------------|
| Kopf/Gesicht                                                                                                                                                                                                                                                                                              | Kopf/Hals                                                                   | Kopf/Hals                                                                                                     |                          |                          |       |                          |                          |                          |                          |                          |                                                                                                                                                                                                                                                                                                           |     |        |          |        |       |                          |                          |                          |                          |                          |                                                                                                                                                                                                                                                                                                           |     |        |          |        |       |                          |                          |                          |                          |                          |
| <table border="1"> <tr> <th>nie</th> <th>selten</th> <th>manchmal</th> <th>häufig</th> <th>immer</th> </tr> <tr> <td><input type="checkbox"/></td> <td><input type="checkbox"/></td> <td><input type="checkbox"/></td> <td><input type="checkbox"/></td> <td><input type="checkbox"/></td> </tr> </table> | nie                                                                         | selten                                                                                                        | manchmal                 | häufig                   | immer | <input type="checkbox"/> | <input type="checkbox"/> | <input type="checkbox"/> | <input type="checkbox"/> | <input type="checkbox"/> | <table border="1"> <tr> <th>nie</th> <th>selten</th> <th>manchmal</th> <th>häufig</th> <th>immer</th> </tr> <tr> <td><input type="checkbox"/></td> <td><input type="checkbox"/></td> <td><input type="checkbox"/></td> <td><input type="checkbox"/></td> <td><input type="checkbox"/></td> </tr> </table> | nie | selten | manchmal | häufig | immer | <input type="checkbox"/> | <input type="checkbox"/> | <input type="checkbox"/> | <input type="checkbox"/> | <input type="checkbox"/> | <table border="1"> <tr> <th>nie</th> <th>selten</th> <th>manchmal</th> <th>häufig</th> <th>immer</th> </tr> <tr> <td><input type="checkbox"/></td> <td><input type="checkbox"/></td> <td><input type="checkbox"/></td> <td><input type="checkbox"/></td> <td><input type="checkbox"/></td> </tr> </table> | nie | selten | manchmal | häufig | immer | <input type="checkbox"/> | <input type="checkbox"/> | <input type="checkbox"/> | <input type="checkbox"/> | <input type="checkbox"/> |
| nie                                                                                                                                                                                                                                                                                                       | selten                                                                      | manchmal                                                                                                      | häufig                   | immer                    |       |                          |                          |                          |                          |                          |                                                                                                                                                                                                                                                                                                           |     |        |          |        |       |                          |                          |                          |                          |                          |                                                                                                                                                                                                                                                                                                           |     |        |          |        |       |                          |                          |                          |                          |                          |
| <input type="checkbox"/>                                                                                                                                                                                                                                                                                  | <input type="checkbox"/>                                                    | <input type="checkbox"/>                                                                                      | <input type="checkbox"/> | <input type="checkbox"/> |       |                          |                          |                          |                          |                          |                                                                                                                                                                                                                                                                                                           |     |        |          |        |       |                          |                          |                          |                          |                          |                                                                                                                                                                                                                                                                                                           |     |        |          |        |       |                          |                          |                          |                          |                          |
| nie                                                                                                                                                                                                                                                                                                       | selten                                                                      | manchmal                                                                                                      | häufig                   | immer                    |       |                          |                          |                          |                          |                          |                                                                                                                                                                                                                                                                                                           |     |        |          |        |       |                          |                          |                          |                          |                          |                                                                                                                                                                                                                                                                                                           |     |        |          |        |       |                          |                          |                          |                          |                          |
| <input type="checkbox"/>                                                                                                                                                                                                                                                                                  | <input type="checkbox"/>                                                    | <input type="checkbox"/>                                                                                      | <input type="checkbox"/> | <input type="checkbox"/> |       |                          |                          |                          |                          |                          |                                                                                                                                                                                                                                                                                                           |     |        |          |        |       |                          |                          |                          |                          |                          |                                                                                                                                                                                                                                                                                                           |     |        |          |        |       |                          |                          |                          |                          |                          |
| nie                                                                                                                                                                                                                                                                                                       | selten                                                                      | manchmal                                                                                                      | häufig                   | immer                    |       |                          |                          |                          |                          |                          |                                                                                                                                                                                                                                                                                                           |     |        |          |        |       |                          |                          |                          |                          |                          |                                                                                                                                                                                                                                                                                                           |     |        |          |        |       |                          |                          |                          |                          |                          |
| <input type="checkbox"/>                                                                                                                                                                                                                                                                                  | <input type="checkbox"/>                                                    | <input type="checkbox"/>                                                                                      | <input type="checkbox"/> | <input type="checkbox"/> |       |                          |                          |                          |                          |                          |                                                                                                                                                                                                                                                                                                           |     |        |          |        |       |                          |                          |                          |                          |                          |                                                                                                                                                                                                                                                                                                           |     |        |          |        |       |                          |                          |                          |                          |                          |

|                                                                                                                                                                                                                                                                                                                                                                                     |                                                                                                                                                                                                                                                                                                            |
|-------------------------------------------------------------------------------------------------------------------------------------------------------------------------------------------------------------------------------------------------------------------------------------------------------------------------------------------------------------------------------------|------------------------------------------------------------------------------------------------------------------------------------------------------------------------------------------------------------------------------------------------------------------------------------------------------------|
| <b>CVI : 0.86</b><br><b>Umformulierung (Einzelitem und Stammfrage)</b><br>Berücksichtigte Kommentare: <ul style="list-style-type: none"> <li>„Die Frage ist verständlich aber passt nicht so ganz zu den Antwortmöglichkeiten. Wie häufig sind diese Körperteile betroffen?“</li> <li>„Sollte hier oder unter Punkt 2b auch der Hals und Nacken mit aufgenommen werden?“</li> </ul> | <b>KI:</b><br><b>Ergänzung (Stammfrage)</b> <ul style="list-style-type: none"> <li>Ergänzung „von Ihrer Bewegungsstörung“ verdeutlicht, dass die Betroffenheit durch die Bewegungsstörung und nicht durch andere, z.B. sensible Symptome (wie Kribbeln, Schmerzen, etc.) beurteilt werden soll.</li> </ul> |
|-------------------------------------------------------------------------------------------------------------------------------------------------------------------------------------------------------------------------------------------------------------------------------------------------------------------------------------------------------------------------------------|------------------------------------------------------------------------------------------------------------------------------------------------------------------------------------------------------------------------------------------------------------------------------------------------------------|

| <b>Version 1:</b><br><b>2b. Welche Körperteile sind betroffen?</b>                                                                                                                                                                                                                                        | <b>Version 2:</b><br><b>Wie häufig sind folgende Körperteile betroffen?</b> | <b>Version 3:</b><br><b>Wie häufig sind folgende Körperteile <u>von</u> Ihrer Bewegungsstörung betroffen?</b> |                          |                          |       |                          |                          |                          |                          |                          |                                                                                                                                                                                                                                                                                                           |     |        |          |        |       |                          |                          |                          |                          |                          |                                                                                                                                                                                                                                                                                                           |     |        |          |        |       |                          |                          |                          |                          |                          |
|-----------------------------------------------------------------------------------------------------------------------------------------------------------------------------------------------------------------------------------------------------------------------------------------------------------|-----------------------------------------------------------------------------|---------------------------------------------------------------------------------------------------------------|--------------------------|--------------------------|-------|--------------------------|--------------------------|--------------------------|--------------------------|--------------------------|-----------------------------------------------------------------------------------------------------------------------------------------------------------------------------------------------------------------------------------------------------------------------------------------------------------|-----|--------|----------|--------|-------|--------------------------|--------------------------|--------------------------|--------------------------|--------------------------|-----------------------------------------------------------------------------------------------------------------------------------------------------------------------------------------------------------------------------------------------------------------------------------------------------------|-----|--------|----------|--------|-------|--------------------------|--------------------------|--------------------------|--------------------------|--------------------------|
| Rumpf                                                                                                                                                                                                                                                                                                     | Rumpf                                                                       | Rumpf                                                                                                         |                          |                          |       |                          |                          |                          |                          |                          |                                                                                                                                                                                                                                                                                                           |     |        |          |        |       |                          |                          |                          |                          |                          |                                                                                                                                                                                                                                                                                                           |     |        |          |        |       |                          |                          |                          |                          |                          |
| <table border="1"> <tr> <th>nie</th> <th>selten</th> <th>manchmal</th> <th>häufig</th> <th>immer</th> </tr> <tr> <td><input type="checkbox"/></td> <td><input type="checkbox"/></td> <td><input type="checkbox"/></td> <td><input type="checkbox"/></td> <td><input type="checkbox"/></td> </tr> </table> | nie                                                                         | selten                                                                                                        | manchmal                 | häufig                   | immer | <input type="checkbox"/> | <input type="checkbox"/> | <input type="checkbox"/> | <input type="checkbox"/> | <input type="checkbox"/> | <table border="1"> <tr> <th>nie</th> <th>selten</th> <th>manchmal</th> <th>häufig</th> <th>immer</th> </tr> <tr> <td><input type="checkbox"/></td> <td><input type="checkbox"/></td> <td><input type="checkbox"/></td> <td><input type="checkbox"/></td> <td><input type="checkbox"/></td> </tr> </table> | nie | selten | manchmal | häufig | immer | <input type="checkbox"/> | <input type="checkbox"/> | <input type="checkbox"/> | <input type="checkbox"/> | <input type="checkbox"/> | <table border="1"> <tr> <th>nie</th> <th>selten</th> <th>manchmal</th> <th>häufig</th> <th>immer</th> </tr> <tr> <td><input type="checkbox"/></td> <td><input type="checkbox"/></td> <td><input type="checkbox"/></td> <td><input type="checkbox"/></td> <td><input type="checkbox"/></td> </tr> </table> | nie | selten | manchmal | häufig | immer | <input type="checkbox"/> | <input type="checkbox"/> | <input type="checkbox"/> | <input type="checkbox"/> | <input type="checkbox"/> |
| nie                                                                                                                                                                                                                                                                                                       | selten                                                                      | manchmal                                                                                                      | häufig                   | immer                    |       |                          |                          |                          |                          |                          |                                                                                                                                                                                                                                                                                                           |     |        |          |        |       |                          |                          |                          |                          |                          |                                                                                                                                                                                                                                                                                                           |     |        |          |        |       |                          |                          |                          |                          |                          |
| <input type="checkbox"/>                                                                                                                                                                                                                                                                                  | <input type="checkbox"/>                                                    | <input type="checkbox"/>                                                                                      | <input type="checkbox"/> | <input type="checkbox"/> |       |                          |                          |                          |                          |                          |                                                                                                                                                                                                                                                                                                           |     |        |          |        |       |                          |                          |                          |                          |                          |                                                                                                                                                                                                                                                                                                           |     |        |          |        |       |                          |                          |                          |                          |                          |
| nie                                                                                                                                                                                                                                                                                                       | selten                                                                      | manchmal                                                                                                      | häufig                   | immer                    |       |                          |                          |                          |                          |                          |                                                                                                                                                                                                                                                                                                           |     |        |          |        |       |                          |                          |                          |                          |                          |                                                                                                                                                                                                                                                                                                           |     |        |          |        |       |                          |                          |                          |                          |                          |
| <input type="checkbox"/>                                                                                                                                                                                                                                                                                  | <input type="checkbox"/>                                                    | <input type="checkbox"/>                                                                                      | <input type="checkbox"/> | <input type="checkbox"/> |       |                          |                          |                          |                          |                          |                                                                                                                                                                                                                                                                                                           |     |        |          |        |       |                          |                          |                          |                          |                          |                                                                                                                                                                                                                                                                                                           |     |        |          |        |       |                          |                          |                          |                          |                          |
| nie                                                                                                                                                                                                                                                                                                       | selten                                                                      | manchmal                                                                                                      | häufig                   | immer                    |       |                          |                          |                          |                          |                          |                                                                                                                                                                                                                                                                                                           |     |        |          |        |       |                          |                          |                          |                          |                          |                                                                                                                                                                                                                                                                                                           |     |        |          |        |       |                          |                          |                          |                          |                          |
| <input type="checkbox"/>                                                                                                                                                                                                                                                                                  | <input type="checkbox"/>                                                    | <input type="checkbox"/>                                                                                      | <input type="checkbox"/> | <input type="checkbox"/> |       |                          |                          |                          |                          |                          |                                                                                                                                                                                                                                                                                                           |     |        |          |        |       |                          |                          |                          |                          |                          |                                                                                                                                                                                                                                                                                                           |     |        |          |        |       |                          |                          |                          |                          |                          |

|                                                                                                                                                                                                                                                                          |                                                                                                                                                                                                                                                                                                            |
|--------------------------------------------------------------------------------------------------------------------------------------------------------------------------------------------------------------------------------------------------------------------------|------------------------------------------------------------------------------------------------------------------------------------------------------------------------------------------------------------------------------------------------------------------------------------------------------------|
| <b>CVI : 0.86</b><br><b>Umformulierung (Stammfrage)</b><br>Berücksichtigter Kommentar: <ul style="list-style-type: none"> <li>„Die Frage ist verständlich aber passt nicht so ganz zu den Antwortmöglichkeiten. Wie häufig sind diese Körperteile betroffen?“</li> </ul> | <b>KI:</b><br><b>Ergänzung (Stammfrage)</b> <ul style="list-style-type: none"> <li>Ergänzung „von Ihrer Bewegungsstörung“ verdeutlicht, dass die Betroffenheit durch die Bewegungsstörung und nicht durch andere, z.B. sensible Symptome (wie Kribbeln, Schmerzen, etc.) beurteilt werden soll.</li> </ul> |
|--------------------------------------------------------------------------------------------------------------------------------------------------------------------------------------------------------------------------------------------------------------------------|------------------------------------------------------------------------------------------------------------------------------------------------------------------------------------------------------------------------------------------------------------------------------------------------------------|

| <b>Version 1:</b><br><b>2c. Welche Körperteile sind betroffen?</b>                                                                                                                                                                                                                                        | <b>Version 2:</b><br><b>Wie häufig sind folgende Körperteile betroffen?</b> | <b>Version 3:</b><br><b>Wie häufig sind folgende Körperteile von Ihrer Bewegungsstörung betroffen?</b> |                          |                          |       |                          |                          |                          |                          |                          |                                                                                                                                                                                                                                                                                                           |     |        |          |        |       |                          |                          |                          |                          |                          |                                                                                                                                                                                                                                                                                                           |     |        |          |        |       |                          |                          |                          |                          |                          |
|-----------------------------------------------------------------------------------------------------------------------------------------------------------------------------------------------------------------------------------------------------------------------------------------------------------|-----------------------------------------------------------------------------|--------------------------------------------------------------------------------------------------------|--------------------------|--------------------------|-------|--------------------------|--------------------------|--------------------------|--------------------------|--------------------------|-----------------------------------------------------------------------------------------------------------------------------------------------------------------------------------------------------------------------------------------------------------------------------------------------------------|-----|--------|----------|--------|-------|--------------------------|--------------------------|--------------------------|--------------------------|--------------------------|-----------------------------------------------------------------------------------------------------------------------------------------------------------------------------------------------------------------------------------------------------------------------------------------------------------|-----|--------|----------|--------|-------|--------------------------|--------------------------|--------------------------|--------------------------|--------------------------|
| Linker Arm                                                                                                                                                                                                                                                                                                | Arme und Hände                                                              | Arme und Hände                                                                                         |                          |                          |       |                          |                          |                          |                          |                          |                                                                                                                                                                                                                                                                                                           |     |        |          |        |       |                          |                          |                          |                          |                          |                                                                                                                                                                                                                                                                                                           |     |        |          |        |       |                          |                          |                          |                          |                          |
| <table border="1"> <tr> <th>nie</th> <th>selten</th> <th>manchmal</th> <th>häufig</th> <th>immer</th> </tr> <tr> <td><input type="checkbox"/></td> <td><input type="checkbox"/></td> <td><input type="checkbox"/></td> <td><input type="checkbox"/></td> <td><input type="checkbox"/></td> </tr> </table> | nie                                                                         | selten                                                                                                 | manchmal                 | häufig                   | immer | <input type="checkbox"/> | <input type="checkbox"/> | <input type="checkbox"/> | <input type="checkbox"/> | <input type="checkbox"/> | <table border="1"> <tr> <th>nie</th> <th>selten</th> <th>manchmal</th> <th>häufig</th> <th>immer</th> </tr> <tr> <td><input type="checkbox"/></td> <td><input type="checkbox"/></td> <td><input type="checkbox"/></td> <td><input type="checkbox"/></td> <td><input type="checkbox"/></td> </tr> </table> | nie | selten | manchmal | häufig | immer | <input type="checkbox"/> | <input type="checkbox"/> | <input type="checkbox"/> | <input type="checkbox"/> | <input type="checkbox"/> | <table border="1"> <tr> <th>nie</th> <th>selten</th> <th>manchmal</th> <th>häufig</th> <th>immer</th> </tr> <tr> <td><input type="checkbox"/></td> <td><input type="checkbox"/></td> <td><input type="checkbox"/></td> <td><input type="checkbox"/></td> <td><input type="checkbox"/></td> </tr> </table> | nie | selten | manchmal | häufig | immer | <input type="checkbox"/> | <input type="checkbox"/> | <input type="checkbox"/> | <input type="checkbox"/> | <input type="checkbox"/> |
| nie                                                                                                                                                                                                                                                                                                       | selten                                                                      | manchmal                                                                                               | häufig                   | immer                    |       |                          |                          |                          |                          |                          |                                                                                                                                                                                                                                                                                                           |     |        |          |        |       |                          |                          |                          |                          |                          |                                                                                                                                                                                                                                                                                                           |     |        |          |        |       |                          |                          |                          |                          |                          |
| <input type="checkbox"/>                                                                                                                                                                                                                                                                                  | <input type="checkbox"/>                                                    | <input type="checkbox"/>                                                                               | <input type="checkbox"/> | <input type="checkbox"/> |       |                          |                          |                          |                          |                          |                                                                                                                                                                                                                                                                                                           |     |        |          |        |       |                          |                          |                          |                          |                          |                                                                                                                                                                                                                                                                                                           |     |        |          |        |       |                          |                          |                          |                          |                          |
| nie                                                                                                                                                                                                                                                                                                       | selten                                                                      | manchmal                                                                                               | häufig                   | immer                    |       |                          |                          |                          |                          |                          |                                                                                                                                                                                                                                                                                                           |     |        |          |        |       |                          |                          |                          |                          |                          |                                                                                                                                                                                                                                                                                                           |     |        |          |        |       |                          |                          |                          |                          |                          |
| <input type="checkbox"/>                                                                                                                                                                                                                                                                                  | <input type="checkbox"/>                                                    | <input type="checkbox"/>                                                                               | <input type="checkbox"/> | <input type="checkbox"/> |       |                          |                          |                          |                          |                          |                                                                                                                                                                                                                                                                                                           |     |        |          |        |       |                          |                          |                          |                          |                          |                                                                                                                                                                                                                                                                                                           |     |        |          |        |       |                          |                          |                          |                          |                          |
| nie                                                                                                                                                                                                                                                                                                       | selten                                                                      | manchmal                                                                                               | häufig                   | immer                    |       |                          |                          |                          |                          |                          |                                                                                                                                                                                                                                                                                                           |     |        |          |        |       |                          |                          |                          |                          |                          |                                                                                                                                                                                                                                                                                                           |     |        |          |        |       |                          |                          |                          |                          |                          |
| <input type="checkbox"/>                                                                                                                                                                                                                                                                                  | <input type="checkbox"/>                                                    | <input type="checkbox"/>                                                                               | <input type="checkbox"/> | <input type="checkbox"/> |       |                          |                          |                          |                          |                          |                                                                                                                                                                                                                                                                                                           |     |        |          |        |       |                          |                          |                          |                          |                          |                                                                                                                                                                                                                                                                                                           |     |        |          |        |       |                          |                          |                          |                          |                          |

|                                                                                                                                                                                                                                                                                                                                                                                                                                                                                                                                                                               |                                                                                                                                                                                                                                                                                                            |
|-------------------------------------------------------------------------------------------------------------------------------------------------------------------------------------------------------------------------------------------------------------------------------------------------------------------------------------------------------------------------------------------------------------------------------------------------------------------------------------------------------------------------------------------------------------------------------|------------------------------------------------------------------------------------------------------------------------------------------------------------------------------------------------------------------------------------------------------------------------------------------------------------|
| <b>CVI : 0.86</b><br><b>Umformulierung (Einzelitem und Stammfrage)</b><br>Berücksichtigte Kommentare: <ul style="list-style-type: none"> <li>„Die Frage ist verständlich aber passt nicht so ganz zu den Antwortmöglichkeiten. Wie häufig sind diese Körperteile betroffen?“</li> <li>„Sollte unter Punkt 2c und d die Hand und unter Punkt 2e und f der Fuß mit aufgenommen werden?“</li> </ul> <b>Zusammenlegung zweier Einzelitems</b><br>Berücksichtigter Kommentar: <ul style="list-style-type: none"> <li>„Aber warum li/re Arm? Was ist die Idee dahinter?“</li> </ul> | <b>KI:</b><br><b>Ergänzung (Stammfrage)</b> <ul style="list-style-type: none"> <li>Ergänzung „von Ihrer Bewegungsstörung“ verdeutlicht, dass die Betroffenheit durch die Bewegungsstörung und nicht durch andere, z.B. sensible Symptome (wie Kribbeln, Schmerzen, etc.) beurteilt werden soll.</li> </ul> |
|-------------------------------------------------------------------------------------------------------------------------------------------------------------------------------------------------------------------------------------------------------------------------------------------------------------------------------------------------------------------------------------------------------------------------------------------------------------------------------------------------------------------------------------------------------------------------------|------------------------------------------------------------------------------------------------------------------------------------------------------------------------------------------------------------------------------------------------------------------------------------------------------------|

|                                                                    |                                                                             |                                                                                                        |
|--------------------------------------------------------------------|-----------------------------------------------------------------------------|--------------------------------------------------------------------------------------------------------|
| <b>Version 1:</b><br><b>2d. Welche Körperteile sind betroffen?</b> | <b>Version 2:</b><br><b>Wie häufig sind folgende Körperteile betroffen?</b> | <b>Version 3:</b><br><b>Wie häufig sind folgende Körperteile von Ihrer Bewegungsstörung betroffen?</b> |
| Linkes Bein                                                        | Beine und Füße                                                              | Beine und Füße                                                                                         |

|                          |                          |                          |                          |                          |                          |                          |                          |                          |                          |                          |                          |                          |                          |                          |
|--------------------------|--------------------------|--------------------------|--------------------------|--------------------------|--------------------------|--------------------------|--------------------------|--------------------------|--------------------------|--------------------------|--------------------------|--------------------------|--------------------------|--------------------------|
| nie                      | selten                   | manchmal                 | häufig                   | immer                    | nie                      | selten                   | manchmal                 | häufig                   | immer                    | nie                      | selten                   | manchmal                 | häufig                   | immer                    |
| <input type="checkbox"/> | <input type="checkbox"/> | <input type="checkbox"/> | <input type="checkbox"/> | <input type="checkbox"/> | <input type="checkbox"/> | <input type="checkbox"/> | <input type="checkbox"/> | <input type="checkbox"/> | <input type="checkbox"/> | <input type="checkbox"/> | <input type="checkbox"/> | <input type="checkbox"/> | <input type="checkbox"/> | <input type="checkbox"/> |

|                                                                                                                                                                                                                                                                                                                                                                                                                                                                                                                                                                                                                   |                                                                                                                                                                                                                                                                                                                     |
|-------------------------------------------------------------------------------------------------------------------------------------------------------------------------------------------------------------------------------------------------------------------------------------------------------------------------------------------------------------------------------------------------------------------------------------------------------------------------------------------------------------------------------------------------------------------------------------------------------------------|---------------------------------------------------------------------------------------------------------------------------------------------------------------------------------------------------------------------------------------------------------------------------------------------------------------------|
| <p><b>CVI : 0.86</b><br/> <b>Umformulierung (Einzelitem und Stammfrage)</b><br/>         Berücksichtigte Kommentare:</p> <ul style="list-style-type: none"> <li>„Die Frage ist verständlich aber passt nicht so ganz zu den Antwortmöglichkeiten. Wie häufig sind diese Körperteile betroffen?“</li> <li>„Sollte unter Punkt 2c und d die Hand und unter Punkt 2e und f der Fuß mit aufgenommen werden?“</li> </ul> <p><b>Zusammenlegung zweier Einzelitems</b><br/>         Berücksichtigter Kommentar:</p> <ul style="list-style-type: none"> <li>„Aber warum li/re Arm? Was ist die Idee dahinter?“</li> </ul> | <p><b>KI:</b><br/> <b>Ergänzung (Stammfrage)</b></p> <ul style="list-style-type: none"> <li>Ergänzung „von Ihrer Bewegungsstörung“ verdeutlicht, dass die Betroffenheit durch die Bewegungsstörung und nicht durch andere, z.B. sensible Symptome (wie Kribbeln, Schmerzen, etc.) beurteilt werden soll.</li> </ul> |
|-------------------------------------------------------------------------------------------------------------------------------------------------------------------------------------------------------------------------------------------------------------------------------------------------------------------------------------------------------------------------------------------------------------------------------------------------------------------------------------------------------------------------------------------------------------------------------------------------------------------|---------------------------------------------------------------------------------------------------------------------------------------------------------------------------------------------------------------------------------------------------------------------------------------------------------------------|

|                                                                                                                                                                                                        |                                                                                                |                                                                                                |                                           |                          |                          |                          |                                                                                                                                                                                                                                                                                                             |        |          |                             |                                           |                          |                          |                          |                          |                                                                                                                                                                                                                                                                                                             |        |          |                             |                                           |                          |                          |                          |                          |
|--------------------------------------------------------------------------------------------------------------------------------------------------------------------------------------------------------|------------------------------------------------------------------------------------------------|------------------------------------------------------------------------------------------------|-------------------------------------------|--------------------------|--------------------------|--------------------------|-------------------------------------------------------------------------------------------------------------------------------------------------------------------------------------------------------------------------------------------------------------------------------------------------------------|--------|----------|-----------------------------|-------------------------------------------|--------------------------|--------------------------|--------------------------|--------------------------|-------------------------------------------------------------------------------------------------------------------------------------------------------------------------------------------------------------------------------------------------------------------------------------------------------------|--------|----------|-----------------------------|-------------------------------------------|--------------------------|--------------------------|--------------------------|--------------------------|
| <p><b>3a. Version 1:</b><br/>         Wie sicher können Sie folgende Bewegungen <u>ohne</u> Unterstützung oder Hilfsmittel ausführen?</p>                                                              | <p><b>4a. Version 2:</b><br/>         Wie sicher können Sie folgende Bewegungen ausführen?</p> | <p><b>4a. Version 3:</b><br/>         Wie sicher können Sie folgende Bewegungen ausführen?</p> |                                           |                          |                          |                          |                                                                                                                                                                                                                                                                                                             |        |          |                             |                                           |                          |                          |                          |                          |                                                                                                                                                                                                                                                                                                             |        |          |                             |                                           |                          |                          |                          |                          |
| Frei stehen                                                                                                                                                                                            | Frei stehen                                                                                    | Stehen                                                                                         |                                           |                          |                          |                          |                                                                                                                                                                                                                                                                                                             |        |          |                             |                                           |                          |                          |                          |                          |                                                                                                                                                                                                                                                                                                             |        |          |                             |                                           |                          |                          |                          |                          |
| <table border="1"> <tr> <td>sicher</td><td>unsicher</td><td>unmöglich</td></tr> <tr> <td><input type="checkbox"/></td><td><input type="checkbox"/></td><td><input type="checkbox"/></td></tr> </table> | sicher                                                                                         | unsicher                                                                                       | unmöglich                                 | <input type="checkbox"/> | <input type="checkbox"/> | <input type="checkbox"/> | <table border="1"> <tr> <td>sicher</td><td>unsicher</td><td>nur mit Hilfsmittel möglich</td><td>nicht möglich, auch nicht mit Hilfsmittel</td></tr> <tr> <td><input type="checkbox"/></td><td><input type="checkbox"/></td><td><input type="checkbox"/></td><td><input type="checkbox"/></td></tr> </table> | sicher | unsicher | nur mit Hilfsmittel möglich | nicht möglich, auch nicht mit Hilfsmittel | <input type="checkbox"/> | <input type="checkbox"/> | <input type="checkbox"/> | <input type="checkbox"/> | <table border="1"> <tr> <td>sicher</td><td>unsicher</td><td>nur mit Hilfsmittel möglich</td><td>nicht möglich, auch nicht mit Hilfsmittel</td></tr> <tr> <td><input type="checkbox"/></td><td><input type="checkbox"/></td><td><input type="checkbox"/></td><td><input type="checkbox"/></td></tr> </table> | sicher | unsicher | nur mit Hilfsmittel möglich | nicht möglich, auch nicht mit Hilfsmittel | <input type="checkbox"/> | <input type="checkbox"/> | <input type="checkbox"/> | <input type="checkbox"/> |
| sicher                                                                                                                                                                                                 | unsicher                                                                                       | unmöglich                                                                                      |                                           |                          |                          |                          |                                                                                                                                                                                                                                                                                                             |        |          |                             |                                           |                          |                          |                          |                          |                                                                                                                                                                                                                                                                                                             |        |          |                             |                                           |                          |                          |                          |                          |
| <input type="checkbox"/>                                                                                                                                                                               | <input type="checkbox"/>                                                                       | <input type="checkbox"/>                                                                       |                                           |                          |                          |                          |                                                                                                                                                                                                                                                                                                             |        |          |                             |                                           |                          |                          |                          |                          |                                                                                                                                                                                                                                                                                                             |        |          |                             |                                           |                          |                          |                          |                          |
| sicher                                                                                                                                                                                                 | unsicher                                                                                       | nur mit Hilfsmittel möglich                                                                    | nicht möglich, auch nicht mit Hilfsmittel |                          |                          |                          |                                                                                                                                                                                                                                                                                                             |        |          |                             |                                           |                          |                          |                          |                          |                                                                                                                                                                                                                                                                                                             |        |          |                             |                                           |                          |                          |                          |                          |
| <input type="checkbox"/>                                                                                                                                                                               | <input type="checkbox"/>                                                                       | <input type="checkbox"/>                                                                       | <input type="checkbox"/>                  |                          |                          |                          |                                                                                                                                                                                                                                                                                                             |        |          |                             |                                           |                          |                          |                          |                          |                                                                                                                                                                                                                                                                                                             |        |          |                             |                                           |                          |                          |                          |                          |
| sicher                                                                                                                                                                                                 | unsicher                                                                                       | nur mit Hilfsmittel möglich                                                                    | nicht möglich, auch nicht mit Hilfsmittel |                          |                          |                          |                                                                                                                                                                                                                                                                                                             |        |          |                             |                                           |                          |                          |                          |                          |                                                                                                                                                                                                                                                                                                             |        |          |                             |                                           |                          |                          |                          |                          |
| <input type="checkbox"/>                                                                                                                                                                               | <input type="checkbox"/>                                                                       | <input type="checkbox"/>                                                                       | <input type="checkbox"/>                  |                          |                          |                          |                                                                                                                                                                                                                                                                                                             |        |          |                             |                                           |                          |                          |                          |                          |                                                                                                                                                                                                                                                                                                             |        |          |                             |                                           |                          |                          |                          |                          |

|                                                                                                                                                                                                                                                                           |                                                                                                                                                                                       |
|---------------------------------------------------------------------------------------------------------------------------------------------------------------------------------------------------------------------------------------------------------------------------|---------------------------------------------------------------------------------------------------------------------------------------------------------------------------------------|
| <p><b>CVI: 1,0</b><br/> <b>Umformulierung und Zusammenlegung zweier Stammfragen</b><br/>         Berücksichtigter Kommentar:</p> <ul style="list-style-type: none"> <li>„Alternativ 3 und 4 zusammenfassen: Sicher, unsicher, nur mit Hilfsmittel, unmöglich.“</li> </ul> | <p><b>KI:</b><br/> <b>Umformulierung</b></p> <ul style="list-style-type: none"> <li>Streichung von „frei“, da sonst die dritte und vierte Antwortmöglichkeit nicht passen.</li> </ul> |
|---------------------------------------------------------------------------------------------------------------------------------------------------------------------------------------------------------------------------------------------------------------------------|---------------------------------------------------------------------------------------------------------------------------------------------------------------------------------------|

|                                                                                                                          |                          |                          |                                                                               |                          |                             |                                                                               |                          |                          |                             |                                           |
|--------------------------------------------------------------------------------------------------------------------------|--------------------------|--------------------------|-------------------------------------------------------------------------------|--------------------------|-----------------------------|-------------------------------------------------------------------------------|--------------------------|--------------------------|-----------------------------|-------------------------------------------|
| <b>3b. Version 1:</b><br>Wie sicher können Sie folgende Bewegungen <u>ohne</u> Unterstützung oder Hilfsmittel ausführen? |                          |                          | <b>4b. Version 2:</b><br>Wie sicher können Sie folgende Bewegungen ausführen? |                          |                             | <b>4b. Version 3:</b><br>Wie sicher können Sie folgende Bewegungen ausführen? |                          |                          |                             |                                           |
| Kurze Strecken gehen                                                                                                     |                          |                          | Kurze Strecken gehen (< 10 m)                                                 |                          |                             | Kurze Strecken gehen (< 10 m)                                                 |                          |                          |                             |                                           |
| sicher                                                                                                                   | unsicher                 | unmöglich                | sicher                                                                        | unsicher                 | nur mit Hilfsmittel möglich | nicht möglich, auch nicht mit Hilfsmittel                                     | sicher                   | unsicher                 | nur mit Hilfsmittel möglich | nicht möglich, auch nicht mit Hilfsmittel |
| <input type="checkbox"/>                                                                                                 | <input type="checkbox"/> | <input type="checkbox"/> | <input type="checkbox"/>                                                      | <input type="checkbox"/> | <input type="checkbox"/>    | <input type="checkbox"/>                                                      | <input type="checkbox"/> | <input type="checkbox"/> | <input type="checkbox"/>    | <input type="checkbox"/>                  |

|                                                                                                                                                                                                                                                                                                                                              |                                                                                |
|----------------------------------------------------------------------------------------------------------------------------------------------------------------------------------------------------------------------------------------------------------------------------------------------------------------------------------------------|--------------------------------------------------------------------------------|
| <b>CVI: 1,0</b><br><b>Umformulierung (Einzelitem und Stammfrage) und Zusammenlegung zweier Stammfragen</b><br>Berücksichtigte Kommentare: <ul style="list-style-type: none"> <li>„Alternativ 3 und 4 zusammenfassen: Sicher, unsicher, nur mit Hilfsmittel, unmöglich.“</li> <li>„Eine Entfernungsangabe (10m ?) wäre hilfreich.“</li> </ul> | <b>KI:</b> <ul style="list-style-type: none"> <li>Keine Veränderung</li> </ul> |
|----------------------------------------------------------------------------------------------------------------------------------------------------------------------------------------------------------------------------------------------------------------------------------------------------------------------------------------------|--------------------------------------------------------------------------------|

|                                                                                                                          |                          |                          |                                                                               |                          |                             |                                                                               |                          |                          |                             |                                           |
|--------------------------------------------------------------------------------------------------------------------------|--------------------------|--------------------------|-------------------------------------------------------------------------------|--------------------------|-----------------------------|-------------------------------------------------------------------------------|--------------------------|--------------------------|-----------------------------|-------------------------------------------|
| <b>3c. Version 1:</b><br>Wie sicher können Sie folgende Bewegungen <u>ohne</u> Unterstützung oder Hilfsmittel ausführen? |                          |                          | <b>4c. Version 2:</b><br>Wie sicher können Sie folgende Bewegungen ausführen? |                          |                             | <b>4c. Version 3:</b><br>Wie sicher können Sie folgende Bewegungen ausführen? |                          |                          |                             |                                           |
| Längere Strecken gehen                                                                                                   |                          |                          | Längere Strecken gehen (> 100 m)                                              |                          |                             | Längere Strecken gehen (> 100 m)                                              |                          |                          |                             |                                           |
| sicher                                                                                                                   | unsicher                 | unmöglich                | sicher                                                                        | unsicher                 | nur mit Hilfsmittel möglich | nicht möglich, auch nicht mit Hilfsmittel                                     | sicher                   | unsicher                 | nur mit Hilfsmittel möglich | nicht möglich, auch nicht mit Hilfsmittel |
| <input type="checkbox"/>                                                                                                 | <input type="checkbox"/> | <input type="checkbox"/> | <input type="checkbox"/>                                                      | <input type="checkbox"/> | <input type="checkbox"/>    | <input type="checkbox"/>                                                      | <input type="checkbox"/> | <input type="checkbox"/> | <input type="checkbox"/>    | <input type="checkbox"/>                  |

|                                                                                                                                                                                                                                                                                                                                                     |                                                                                         |
|-----------------------------------------------------------------------------------------------------------------------------------------------------------------------------------------------------------------------------------------------------------------------------------------------------------------------------------------------------|-----------------------------------------------------------------------------------------|
| <p><b>CVI: 1,0</b><br/> <b>Umformulierung (Einzelitem und Stammfrage) und Zusammenlegung zweier Stammfragen</b><br/> Berücksichtigte Kommentare:</p> <ul style="list-style-type: none"> <li>• „Alternativ 3 und 4 zusammenfassen: Sicher, unsicher, nur mit Hilfsmittel, unmöglich.“</li> <li>• „Eine Entfernungsangabe wäre hilfreich.“</li> </ul> | <p><b>KI:</b></p> <ul style="list-style-type: none"> <li>• Keine Veränderung</li> </ul> |
|-----------------------------------------------------------------------------------------------------------------------------------------------------------------------------------------------------------------------------------------------------------------------------------------------------------------------------------------------------|-----------------------------------------------------------------------------------------|

|                          |                          | <p><b>4d. Version 3:</b><br/> <b>Wie sicher können Sie folgende Bewegungen ausführen?</b></p>                                                                                                                                                                                                                                                                                                                                                                                  |                                           |          |                             |                                           |                          |                          |                          |                          |
|--------------------------|--------------------------|--------------------------------------------------------------------------------------------------------------------------------------------------------------------------------------------------------------------------------------------------------------------------------------------------------------------------------------------------------------------------------------------------------------------------------------------------------------------------------|-------------------------------------------|----------|-----------------------------|-------------------------------------------|--------------------------|--------------------------|--------------------------|--------------------------|
|                          |                          | <p><b>1 kg heben oder tragen</b></p>                                                                                                                                                                                                                                                                                                                                                                                                                                           |                                           |          |                             |                                           |                          |                          |                          |                          |
|                          |                          | <table border="1" style="width: 100%; text-align: center;"> <thead> <tr> <th style="width: 25%;">sicher</th> <th style="width: 25%;">unsicher</th> <th style="width: 25%;">nur mit Hilfsmittel möglich</th> <th style="width: 25%;">nicht möglich, auch nicht mit Hilfsmittel</th> </tr> </thead> <tbody> <tr> <td><input type="checkbox"/></td> <td><input type="checkbox"/></td> <td><input type="checkbox"/></td> <td><input type="checkbox"/></td> </tr> </tbody> </table> | sicher                                    | unsicher | nur mit Hilfsmittel möglich | nicht möglich, auch nicht mit Hilfsmittel | <input type="checkbox"/> | <input type="checkbox"/> | <input type="checkbox"/> | <input type="checkbox"/> |
| sicher                   | unsicher                 | nur mit Hilfsmittel möglich                                                                                                                                                                                                                                                                                                                                                                                                                                                    | nicht möglich, auch nicht mit Hilfsmittel |          |                             |                                           |                          |                          |                          |                          |
| <input type="checkbox"/> | <input type="checkbox"/> | <input type="checkbox"/>                                                                                                                                                                                                                                                                                                                                                                                                                                                       | <input type="checkbox"/>                  |          |                             |                                           |                          |                          |                          |                          |

|  |                                                                                                                                                               |
|--|---------------------------------------------------------------------------------------------------------------------------------------------------------------|
|  | <p><b>KI:</b><br/> <b>Ergänzung (Einzelitem)</b></p> <ul style="list-style-type: none"> <li>• Ergänzung der Belastbarkeit der oberen Extremitäten.</li> </ul> |
|--|---------------------------------------------------------------------------------------------------------------------------------------------------------------|

|                                                                                                    |                          |                          |                          |                                                                                     |                          |                          |                                      |                                                                                     |                          |                          |                                      |
|----------------------------------------------------------------------------------------------------|--------------------------|--------------------------|--------------------------|-------------------------------------------------------------------------------------|--------------------------|--------------------------|--------------------------------------|-------------------------------------------------------------------------------------|--------------------------|--------------------------|--------------------------------------|
| <b>5a. Version 1:</b><br>Wie wirkt sich Ihre Bewegungsstörung auf folgende Alltagsaktivitäten aus? |                          |                          |                          | <b>5a. Version 2:</b><br>Beeinträchtigt Ihre Bewegungsstörung folgende Aktivitäten? |                          |                          |                                      | <b>5a. Version 2:</b><br>Beeinträchtigt Ihre Bewegungsstörung folgende Aktivitäten? |                          |                          |                                      |
| Sprechen                                                                                           |                          |                          |                          | Sprechen                                                                            |                          |                          |                                      | Sprechen                                                                            |                          |                          |                                      |
| normal                                                                                             | etwas eingeschränkt      | wesentlich eingeschränkt | unmöglich                | nein                                                                                | ja, etwas                | ja, wesentlich           | ja, vollständig (Ausübung unmöglich) | nein                                                                                | ja, etwas                | ja, wesentlich           | ja, vollständig (Ausübung unmöglich) |
| <input type="checkbox"/>                                                                           | <input type="checkbox"/> | <input type="checkbox"/> | <input type="checkbox"/> | <input type="checkbox"/>                                                            | <input type="checkbox"/> | <input type="checkbox"/> | <input type="checkbox"/>             | <input type="checkbox"/>                                                            | <input type="checkbox"/> | <input type="checkbox"/> | <input type="checkbox"/>             |

|                                                                                                                                                                                                                                                   |                                                                                                                                                                                                                   |
|---------------------------------------------------------------------------------------------------------------------------------------------------------------------------------------------------------------------------------------------------|-------------------------------------------------------------------------------------------------------------------------------------------------------------------------------------------------------------------|
| <b>CVI : 0,86</b><br><b>Umformulierung (Stammfrage)</b><br>Berücksichtigter Kommentar: <ul style="list-style-type: none"> <li>„Aus meiner Sicht verständlicher: Beeinträchtigt ihre Bewegungsstörung ...? Nein, etwas, wesentlich,...“</li> </ul> | <b>KI:</b><br><b>Unterstreichung (Stammfrage)</b> <ul style="list-style-type: none"> <li>Unterstreichung unterstützt Betroffene, die Beeinträchtigung konsequent auf die Bewegungsstörung zu beziehen.</li> </ul> |
|---------------------------------------------------------------------------------------------------------------------------------------------------------------------------------------------------------------------------------------------------|-------------------------------------------------------------------------------------------------------------------------------------------------------------------------------------------------------------------|

|                                                                                                    |                          |                          |                          |                                                                                     |                          |                          |                                      |                                                                                     |                          |                          |                                      |
|----------------------------------------------------------------------------------------------------|--------------------------|--------------------------|--------------------------|-------------------------------------------------------------------------------------|--------------------------|--------------------------|--------------------------------------|-------------------------------------------------------------------------------------|--------------------------|--------------------------|--------------------------------------|
| <b>5c. Version 1:</b><br>Wie wirkt sich Ihre Bewegungsstörung auf folgende Alltagsaktivitäten aus? |                          |                          |                          | <b>5b. Version 2:</b><br>Beeinträchtigt Ihre Bewegungsstörung folgende Aktivitäten? |                          |                          |                                      | <b>5b. Version 2:</b><br>Beeinträchtigt Ihre Bewegungsstörung folgende Aktivitäten? |                          |                          |                                      |
| Essen und Trinken                                                                                  |                          |                          |                          | Essen und Trinken                                                                   |                          |                          |                                      | Essen und Trinken                                                                   |                          |                          |                                      |
| normal                                                                                             | etwas eingeschränkt      | wesentlich eingeschränkt | unmöglich                | nein                                                                                | ja, etwas                | ja, wesentlich           | ja, vollständig (Ausübung unmöglich) | nein                                                                                | ja, etwas                | ja, wesentlich           | ja, vollständig (Ausübung unmöglich) |
| <input type="checkbox"/>                                                                           | <input type="checkbox"/> | <input type="checkbox"/> | <input type="checkbox"/> | <input type="checkbox"/>                                                            | <input type="checkbox"/> | <input type="checkbox"/> | <input type="checkbox"/>             | <input type="checkbox"/>                                                            | <input type="checkbox"/> | <input type="checkbox"/> | <input type="checkbox"/>             |

|                                                                                                                                                                                                                                                                                                                                                                                                                                                                          |                                                                                                                                                                                                                            |
|--------------------------------------------------------------------------------------------------------------------------------------------------------------------------------------------------------------------------------------------------------------------------------------------------------------------------------------------------------------------------------------------------------------------------------------------------------------------------|----------------------------------------------------------------------------------------------------------------------------------------------------------------------------------------------------------------------------|
| <p><b>CVI : 0,86</b><br/> <b>Umformulierung (Stammfrage)</b><br/> Berücksichtigter Kommentar:</p> <ul style="list-style-type: none"> <li>„Aus meiner Sicht verständlicher: Beeinträchtigt ihre Bewegungsstörung ...? Nein, etwas, wesentlich,...“</li> </ul> <p><b>Itemverschiebung innerhalb Fragenblock</b><br/> Berücksichtigter Kommentar:</p> <ul style="list-style-type: none"> <li>„andere Reihenfolge perhaps? Sprechen – Essen/Trinken – Schreiben.“</li> </ul> | <p><b>KI:</b><br/> <b>Unterstreichung (Stammfrage)</b></p> <ul style="list-style-type: none"> <li>Unterstreichung unterstützt Betroffene, die Beeinträchtigung konsequent auf die Bewegungsstörung zu beziehen.</li> </ul> |
|--------------------------------------------------------------------------------------------------------------------------------------------------------------------------------------------------------------------------------------------------------------------------------------------------------------------------------------------------------------------------------------------------------------------------------------------------------------------------|----------------------------------------------------------------------------------------------------------------------------------------------------------------------------------------------------------------------------|

|                                                                                                                                                                                                                                                                                                                                                                                                                      |                                                                                                     |                                                                                                     |                                      |           |                          |                          |                          |                          |                                                                                                                                                                                                                                                                                                                                                                                                                           |      |           |                |                                      |                          |                          |                          |                          |                                                                                                                                                                                                                                                                                                                                                                                                                           |      |           |                |                                      |                          |                          |                          |                          |
|----------------------------------------------------------------------------------------------------------------------------------------------------------------------------------------------------------------------------------------------------------------------------------------------------------------------------------------------------------------------------------------------------------------------|-----------------------------------------------------------------------------------------------------|-----------------------------------------------------------------------------------------------------|--------------------------------------|-----------|--------------------------|--------------------------|--------------------------|--------------------------|---------------------------------------------------------------------------------------------------------------------------------------------------------------------------------------------------------------------------------------------------------------------------------------------------------------------------------------------------------------------------------------------------------------------------|------|-----------|----------------|--------------------------------------|--------------------------|--------------------------|--------------------------|--------------------------|---------------------------------------------------------------------------------------------------------------------------------------------------------------------------------------------------------------------------------------------------------------------------------------------------------------------------------------------------------------------------------------------------------------------------|------|-----------|----------------|--------------------------------------|--------------------------|--------------------------|--------------------------|--------------------------|
| <p><b>5b. Version 1:</b><br/> <b>Wie wirkt sich Ihre Bewegungsstörung auf folgende Alltagsaktivitäten aus?</b></p>                                                                                                                                                                                                                                                                                                   | <p><b>5c. Version 2:</b><br/> <b>Beeinträchtigt Ihre Bewegungsstörung folgende Aktivitäten?</b></p> | <p><b>5c. Version 2:</b><br/> <b>Beeinträchtigt Ihre Bewegungsstörung folgende Aktivitäten?</b></p> |                                      |           |                          |                          |                          |                          |                                                                                                                                                                                                                                                                                                                                                                                                                           |      |           |                |                                      |                          |                          |                          |                          |                                                                                                                                                                                                                                                                                                                                                                                                                           |      |           |                |                                      |                          |                          |                          |                          |
| Schreiben oder Tippen                                                                                                                                                                                                                                                                                                                                                                                                | Schreiben oder Tippen                                                                               | Schreiben oder Tippen                                                                               |                                      |           |                          |                          |                          |                          |                                                                                                                                                                                                                                                                                                                                                                                                                           |      |           |                |                                      |                          |                          |                          |                          |                                                                                                                                                                                                                                                                                                                                                                                                                           |      |           |                |                                      |                          |                          |                          |                          |
| <table border="1" style="width: 100%; text-align: center;"> <tr> <td style="width: 25%;">normal</td> <td style="width: 25%;">etwas eingeschränkt</td> <td style="width: 25%;">wesentlich eingeschränkt</td> <td style="width: 25%;">unmöglich</td> </tr> <tr> <td><input type="checkbox"/></td> <td><input type="checkbox"/></td> <td><input type="checkbox"/></td> <td><input type="checkbox"/></td> </tr> </table> | normal                                                                                              | etwas eingeschränkt                                                                                 | wesentlich eingeschränkt             | unmöglich | <input type="checkbox"/> | <input type="checkbox"/> | <input type="checkbox"/> | <input type="checkbox"/> | <table border="1" style="width: 100%; text-align: center;"> <tr> <td style="width: 25%;">nein</td> <td style="width: 25%;">ja, etwas</td> <td style="width: 25%;">ja, wesentlich</td> <td style="width: 25%;">ja, vollständig (Ausübung unmöglich)</td> </tr> <tr> <td><input type="checkbox"/></td> <td><input type="checkbox"/></td> <td><input type="checkbox"/></td> <td><input type="checkbox"/></td> </tr> </table> | nein | ja, etwas | ja, wesentlich | ja, vollständig (Ausübung unmöglich) | <input type="checkbox"/> | <input type="checkbox"/> | <input type="checkbox"/> | <input type="checkbox"/> | <table border="1" style="width: 100%; text-align: center;"> <tr> <td style="width: 25%;">nein</td> <td style="width: 25%;">ja, etwas</td> <td style="width: 25%;">ja, wesentlich</td> <td style="width: 25%;">ja, vollständig (Ausübung unmöglich)</td> </tr> <tr> <td><input type="checkbox"/></td> <td><input type="checkbox"/></td> <td><input type="checkbox"/></td> <td><input type="checkbox"/></td> </tr> </table> | nein | ja, etwas | ja, wesentlich | ja, vollständig (Ausübung unmöglich) | <input type="checkbox"/> | <input type="checkbox"/> | <input type="checkbox"/> | <input type="checkbox"/> |
| normal                                                                                                                                                                                                                                                                                                                                                                                                               | etwas eingeschränkt                                                                                 | wesentlich eingeschränkt                                                                            | unmöglich                            |           |                          |                          |                          |                          |                                                                                                                                                                                                                                                                                                                                                                                                                           |      |           |                |                                      |                          |                          |                          |                          |                                                                                                                                                                                                                                                                                                                                                                                                                           |      |           |                |                                      |                          |                          |                          |                          |
| <input type="checkbox"/>                                                                                                                                                                                                                                                                                                                                                                                             | <input type="checkbox"/>                                                                            | <input type="checkbox"/>                                                                            | <input type="checkbox"/>             |           |                          |                          |                          |                          |                                                                                                                                                                                                                                                                                                                                                                                                                           |      |           |                |                                      |                          |                          |                          |                          |                                                                                                                                                                                                                                                                                                                                                                                                                           |      |           |                |                                      |                          |                          |                          |                          |
| nein                                                                                                                                                                                                                                                                                                                                                                                                                 | ja, etwas                                                                                           | ja, wesentlich                                                                                      | ja, vollständig (Ausübung unmöglich) |           |                          |                          |                          |                          |                                                                                                                                                                                                                                                                                                                                                                                                                           |      |           |                |                                      |                          |                          |                          |                          |                                                                                                                                                                                                                                                                                                                                                                                                                           |      |           |                |                                      |                          |                          |                          |                          |
| <input type="checkbox"/>                                                                                                                                                                                                                                                                                                                                                                                             | <input type="checkbox"/>                                                                            | <input type="checkbox"/>                                                                            | <input type="checkbox"/>             |           |                          |                          |                          |                          |                                                                                                                                                                                                                                                                                                                                                                                                                           |      |           |                |                                      |                          |                          |                          |                          |                                                                                                                                                                                                                                                                                                                                                                                                                           |      |           |                |                                      |                          |                          |                          |                          |
| nein                                                                                                                                                                                                                                                                                                                                                                                                                 | ja, etwas                                                                                           | ja, wesentlich                                                                                      | ja, vollständig (Ausübung unmöglich) |           |                          |                          |                          |                          |                                                                                                                                                                                                                                                                                                                                                                                                                           |      |           |                |                                      |                          |                          |                          |                          |                                                                                                                                                                                                                                                                                                                                                                                                                           |      |           |                |                                      |                          |                          |                          |                          |
| <input type="checkbox"/>                                                                                                                                                                                                                                                                                                                                                                                             | <input type="checkbox"/>                                                                            | <input type="checkbox"/>                                                                            | <input type="checkbox"/>             |           |                          |                          |                          |                          |                                                                                                                                                                                                                                                                                                                                                                                                                           |      |           |                |                                      |                          |                          |                          |                          |                                                                                                                                                                                                                                                                                                                                                                                                                           |      |           |                |                                      |                          |                          |                          |                          |

|                                                                                                                                                                                                                                                                                                                                                                                                                                                                              |                                                                                                                                                                                                                            |
|------------------------------------------------------------------------------------------------------------------------------------------------------------------------------------------------------------------------------------------------------------------------------------------------------------------------------------------------------------------------------------------------------------------------------------------------------------------------------|----------------------------------------------------------------------------------------------------------------------------------------------------------------------------------------------------------------------------|
| <p><b>CVI : 1,0</b><br/> <b>Umformulierung (Stammfrage)</b><br/> Berücksichtigter Kommentar:</p> <ul style="list-style-type: none"> <li>„Aus meiner Sicht verständlicher: Beeinträchtigt ihre Bewegungsstörung ...? Nein, etwas, wesentlich,...“</li> </ul> <p><b>Itemverschiebung innerhalb des Fragenblocks</b><br/> Berücksichtigter Kommentar:</p> <ul style="list-style-type: none"> <li>„andere Reihenfolge perhaps? Sprechen – Essen/Trinken – Schreiben.“</li> </ul> | <p><b>KI:</b><br/> <b>Unterstreichung (Stammfrage)</b></p> <ul style="list-style-type: none"> <li>Unterstreichung unterstützt Betroffene, die Beeinträchtigung konsequent auf die Bewegungsstörung zu beziehen.</li> </ul> |
|------------------------------------------------------------------------------------------------------------------------------------------------------------------------------------------------------------------------------------------------------------------------------------------------------------------------------------------------------------------------------------------------------------------------------------------------------------------------------|----------------------------------------------------------------------------------------------------------------------------------------------------------------------------------------------------------------------------|

|                                                                                                    |                          |                          |                          |                                                                                     |                          |                          |                                      |                                                                                     |                          |                          |                                      |
|----------------------------------------------------------------------------------------------------|--------------------------|--------------------------|--------------------------|-------------------------------------------------------------------------------------|--------------------------|--------------------------|--------------------------------------|-------------------------------------------------------------------------------------|--------------------------|--------------------------|--------------------------------------|
| <b>5d. Version 1:</b><br>Wie wirkt sich Ihre Bewegungsstörung auf folgende Alltagsaktivitäten aus? |                          |                          |                          | <b>5d. Version 2:</b><br>Beeinträchtigt Ihre Bewegungsstörung folgende Aktivitäten? |                          |                          |                                      | <b>5d. Version 2:</b><br>Beeinträchtigt Ihre Bewegungsstörung folgende Aktivitäten? |                          |                          |                                      |
| Ankleiden                                                                                          |                          |                          |                          | Ankleiden                                                                           |                          |                          |                                      | Ankleiden                                                                           |                          |                          |                                      |
| normal                                                                                             | etwas eingeschränkt      | wesentlich eingeschränkt | unmöglich                | nein                                                                                | ja, etwas                | ja, wesentlich           | ja, vollständig (Ausübung unmöglich) | nein                                                                                | ja, etwas                | ja, wesentlich           | ja, vollständig (Ausübung unmöglich) |
| <input type="checkbox"/>                                                                           | <input type="checkbox"/> | <input type="checkbox"/> | <input type="checkbox"/> | <input type="checkbox"/>                                                            | <input type="checkbox"/> | <input type="checkbox"/> | <input type="checkbox"/>             | <input type="checkbox"/>                                                            | <input type="checkbox"/> | <input type="checkbox"/> | <input type="checkbox"/>             |

|                                                                                                                                                                                                                                                  |                                                                                                                                                                                                                   |
|--------------------------------------------------------------------------------------------------------------------------------------------------------------------------------------------------------------------------------------------------|-------------------------------------------------------------------------------------------------------------------------------------------------------------------------------------------------------------------|
| <b>CVI : 1,0</b><br><b>Umformulierung (Stammfrage)</b><br>Berücksichtigter Kommentar: <ul style="list-style-type: none"> <li>„Aus meiner Sicht verständlicher: Beeinträchtigt ihre Bewegungsstörung ...? Nein, etwas, wesentlich,...“</li> </ul> | <b>KI:</b><br><b>Unterstreichung (Stammfrage)</b> <ul style="list-style-type: none"> <li>Unterstreichung unterstützt Betroffene, die Beeinträchtigung konsequent auf die Bewegungsstörung zu beziehen.</li> </ul> |
|--------------------------------------------------------------------------------------------------------------------------------------------------------------------------------------------------------------------------------------------------|-------------------------------------------------------------------------------------------------------------------------------------------------------------------------------------------------------------------|

|                                                                                                    |                          |                          |                          |                                                                                     |                          |                          |                                      |                                                                                     |                          |                          |                                      |
|----------------------------------------------------------------------------------------------------|--------------------------|--------------------------|--------------------------|-------------------------------------------------------------------------------------|--------------------------|--------------------------|--------------------------------------|-------------------------------------------------------------------------------------|--------------------------|--------------------------|--------------------------------------|
| <b>5d. Version 1:</b><br>Wie wirkt sich Ihre Bewegungsstörung auf folgende Alltagsaktivitäten aus? |                          |                          |                          | <b>5d. Version 2:</b><br>Beeinträchtigt Ihre Bewegungsstörung folgende Aktivitäten? |                          |                          |                                      | <b>5d. Version 2:</b><br>Beeinträchtigt Ihre Bewegungsstörung folgende Aktivitäten? |                          |                          |                                      |
| Körperpflege                                                                                       |                          |                          |                          | Körperpflege                                                                        |                          |                          |                                      | Körperpflege                                                                        |                          |                          |                                      |
| normal                                                                                             | etwas eingeschränkt      | wesentlich eingeschränkt | unmöglich                | nein                                                                                | ja, etwas                | ja, wesentlich           | ja, vollständig (Ausübung unmöglich) | nein                                                                                | ja, etwas                | ja, wesentlich           | ja, vollständig (Ausübung unmöglich) |
| <input type="checkbox"/>                                                                           | <input type="checkbox"/> | <input type="checkbox"/> | <input type="checkbox"/> | <input type="checkbox"/>                                                            | <input type="checkbox"/> | <input type="checkbox"/> | <input type="checkbox"/>             | <input type="checkbox"/>                                                            | <input type="checkbox"/> | <input type="checkbox"/> | <input type="checkbox"/>             |

|                                                                                                                                                                                                                                                  |                                                                                                                                                                                                                   |
|--------------------------------------------------------------------------------------------------------------------------------------------------------------------------------------------------------------------------------------------------|-------------------------------------------------------------------------------------------------------------------------------------------------------------------------------------------------------------------|
| <b>CVI : 1,0</b><br><b>Umformulierung (Stammfrage)</b><br>Berücksichtigter Kommentar: <ul style="list-style-type: none"> <li>„Aus meiner Sicht verständlicher: Beeinträchtigt ihre Bewegungsstörung ...? Nein, etwas, wesentlich,...“</li> </ul> | <b>KI:</b><br><b>Unterstreichung (Stammfrage)</b> <ul style="list-style-type: none"> <li>Unterstreichung unterstützt Betroffene, die Beeinträchtigung konsequent auf die Bewegungsstörung zu beziehen.</li> </ul> |
|--------------------------------------------------------------------------------------------------------------------------------------------------------------------------------------------------------------------------------------------------|-------------------------------------------------------------------------------------------------------------------------------------------------------------------------------------------------------------------|



|                                                                                                                                                                                                      |                                                                                                 |                                                                                                 |                          |                          |                          |                          |                                                                                                                                                                                                                                                           |           |      |        |       |                          |                          |                          |                          |                                                                                                                                                                                                                                                                                                                 |           |      |        |       |            |                          |                          |                          |                          |                          |
|------------------------------------------------------------------------------------------------------------------------------------------------------------------------------------------------------|-------------------------------------------------------------------------------------------------|-------------------------------------------------------------------------------------------------|--------------------------|--------------------------|--------------------------|--------------------------|-----------------------------------------------------------------------------------------------------------------------------------------------------------------------------------------------------------------------------------------------------------|-----------|------|--------|-------|--------------------------|--------------------------|--------------------------|--------------------------|-----------------------------------------------------------------------------------------------------------------------------------------------------------------------------------------------------------------------------------------------------------------------------------------------------------------|-----------|------|--------|-------|------------|--------------------------|--------------------------|--------------------------|--------------------------|--------------------------|
| Version 1:<br>Wie wirken sich folgende Probleme auf Ihre Bewegungsfähigkeit aus?                                                                                                                     | Version 2:<br>Fühlen Sie sich durch folgende Beschwerden beeinträchtigt, wenn Sie sich bewegen? | Version 3:<br>Fühlen Sie bei alltäglichen Bewegungen durch folgende Beschwerden beeinträchtigt? |                          |                          |                          |                          |                                                                                                                                                                                                                                                           |           |      |        |       |                          |                          |                          |                          |                                                                                                                                                                                                                                                                                                                 |           |      |        |       |            |                          |                          |                          |                          |                          |
| 6a. Schwindel oder Benommenheit                                                                                                                                                                      | 6a. Schwindel oder Benommenheit                                                                 | 6a. Schwindel oder Benommenheit                                                                 |                          |                          |                          |                          |                                                                                                                                                                                                                                                           |           |      |        |       |                          |                          |                          |                          |                                                                                                                                                                                                                                                                                                                 |           |      |        |       |            |                          |                          |                          |                          |                          |
| <table border="1"> <tr> <td>kaum</td> <td>mittel</td> <td>stark</td> </tr> <tr> <td><input type="checkbox"/></td> <td><input type="checkbox"/></td> <td><input type="checkbox"/></td> </tr> </table> | kaum                                                                                            | mittel                                                                                          | stark                    | <input type="checkbox"/> | <input type="checkbox"/> | <input type="checkbox"/> | <table border="1"> <tr> <td>gar nicht</td> <td>kaum</td> <td>mittel</td> <td>stark</td> </tr> <tr> <td><input type="checkbox"/></td> <td><input type="checkbox"/></td> <td><input type="checkbox"/></td> <td><input type="checkbox"/></td> </tr> </table> | gar nicht | kaum | mittel | stark | <input type="checkbox"/> | <input type="checkbox"/> | <input type="checkbox"/> | <input type="checkbox"/> | <table border="1"> <tr> <td>gar nicht</td> <td>kaum</td> <td>mittel</td> <td>stark</td> <td>sehr stark</td> </tr> <tr> <td><input type="checkbox"/></td> <td><input type="checkbox"/></td> <td><input type="checkbox"/></td> <td><input type="checkbox"/></td> <td><input type="checkbox"/></td> </tr> </table> | gar nicht | kaum | mittel | stark | sehr stark | <input type="checkbox"/> | <input type="checkbox"/> | <input type="checkbox"/> | <input type="checkbox"/> | <input type="checkbox"/> |
| kaum                                                                                                                                                                                                 | mittel                                                                                          | stark                                                                                           |                          |                          |                          |                          |                                                                                                                                                                                                                                                           |           |      |        |       |                          |                          |                          |                          |                                                                                                                                                                                                                                                                                                                 |           |      |        |       |            |                          |                          |                          |                          |                          |
| <input type="checkbox"/>                                                                                                                                                                             | <input type="checkbox"/>                                                                        | <input type="checkbox"/>                                                                        |                          |                          |                          |                          |                                                                                                                                                                                                                                                           |           |      |        |       |                          |                          |                          |                          |                                                                                                                                                                                                                                                                                                                 |           |      |        |       |            |                          |                          |                          |                          |                          |
| gar nicht                                                                                                                                                                                            | kaum                                                                                            | mittel                                                                                          | stark                    |                          |                          |                          |                                                                                                                                                                                                                                                           |           |      |        |       |                          |                          |                          |                          |                                                                                                                                                                                                                                                                                                                 |           |      |        |       |            |                          |                          |                          |                          |                          |
| <input type="checkbox"/>                                                                                                                                                                             | <input type="checkbox"/>                                                                        | <input type="checkbox"/>                                                                        | <input type="checkbox"/> |                          |                          |                          |                                                                                                                                                                                                                                                           |           |      |        |       |                          |                          |                          |                          |                                                                                                                                                                                                                                                                                                                 |           |      |        |       |            |                          |                          |                          |                          |                          |
| gar nicht                                                                                                                                                                                            | kaum                                                                                            | mittel                                                                                          | stark                    | sehr stark               |                          |                          |                                                                                                                                                                                                                                                           |           |      |        |       |                          |                          |                          |                          |                                                                                                                                                                                                                                                                                                                 |           |      |        |       |            |                          |                          |                          |                          |                          |
| <input type="checkbox"/>                                                                                                                                                                             | <input type="checkbox"/>                                                                        | <input type="checkbox"/>                                                                        | <input type="checkbox"/> | <input type="checkbox"/> |                          |                          |                                                                                                                                                                                                                                                           |           |      |        |       |                          |                          |                          |                          |                                                                                                                                                                                                                                                                                                                 |           |      |        |       |            |                          |                          |                          |                          |                          |

|                                                                                                                                                                                                                                                                    |                                                                                                                                                                                                                                                                                                                                                                                                                                                                                                                                                                                           |
|--------------------------------------------------------------------------------------------------------------------------------------------------------------------------------------------------------------------------------------------------------------------|-------------------------------------------------------------------------------------------------------------------------------------------------------------------------------------------------------------------------------------------------------------------------------------------------------------------------------------------------------------------------------------------------------------------------------------------------------------------------------------------------------------------------------------------------------------------------------------------|
| <b>CVI : 1,0</b><br><b>Umformulierung (Stammfrage)</b><br>Berücksichtigter Kommentar: <ul style="list-style-type: none"> <li>„Aus meiner Sicht klarere Info: Fühlen sie sich durch folgende Beschwerden beeinträchtigt: Gar nicht, kaum, mittel, stark“</li> </ul> | <b>KI:</b><br><b>Umformulierung und Unterstreichung (Stammfrage)</b> <ul style="list-style-type: none"> <li>Ergänzung „alltäglich“ verdeutlicht den Kontext, in dem die Beeinträchtigung durch die Bewegungsstörung beurteilt werden soll.</li> <li>Unterstreichung unterstützt Betroffene, die Beeinträchtigung konsequent auf ihre Bewegungsfähigkeit zu beziehen.</li> </ul> <b>Ergänzung (Antwortmöglichkeit)</b> <ul style="list-style-type: none"> <li>Ergänzung „sehr stark“ ermöglicht den Betroffenen eine weitere Differenzierung zwischen „stark“ und „sehr stark“.</li> </ul> |
|--------------------------------------------------------------------------------------------------------------------------------------------------------------------------------------------------------------------------------------------------------------------|-------------------------------------------------------------------------------------------------------------------------------------------------------------------------------------------------------------------------------------------------------------------------------------------------------------------------------------------------------------------------------------------------------------------------------------------------------------------------------------------------------------------------------------------------------------------------------------------|

|                                                                                                                                                                                                      |                                                                                                 |                                                                                                 |                          |                          |                          |                          |                                                                                                                                                                                                                                                           |           |      |        |       |                          |                          |                          |                          |                                                                                                                                                                                                                                                                                                                 |           |      |        |       |            |                          |                          |                          |                          |                          |
|------------------------------------------------------------------------------------------------------------------------------------------------------------------------------------------------------|-------------------------------------------------------------------------------------------------|-------------------------------------------------------------------------------------------------|--------------------------|--------------------------|--------------------------|--------------------------|-----------------------------------------------------------------------------------------------------------------------------------------------------------------------------------------------------------------------------------------------------------|-----------|------|--------|-------|--------------------------|--------------------------|--------------------------|--------------------------|-----------------------------------------------------------------------------------------------------------------------------------------------------------------------------------------------------------------------------------------------------------------------------------------------------------------|-----------|------|--------|-------|------------|--------------------------|--------------------------|--------------------------|--------------------------|--------------------------|
| Version 1:<br>Wie wirken sich folgende Probleme auf Ihre Bewegungsfähigkeit aus?                                                                                                                     | Version 2:<br>Fühlen Sie sich durch folgende Beschwerden beeinträchtigt, wenn Sie sich bewegen? | Version 3:<br>Fühlen Sie bei alltäglichen Bewegungen durch folgende Beschwerden beeinträchtigt? |                          |                          |                          |                          |                                                                                                                                                                                                                                                           |           |      |        |       |                          |                          |                          |                          |                                                                                                                                                                                                                                                                                                                 |           |      |        |       |            |                          |                          |                          |                          |                          |
| 6b. Schmerzen (z. B. Rückenschmerzen oder Gelenkschmerzen)                                                                                                                                           | 6b. Schmerzen (z. B. Rückenschmerzen oder Gelenkschmerzen)                                      | 6b. Schmerzen (z. B. Rückenschmerzen oder Gelenkschmerzen)                                      |                          |                          |                          |                          |                                                                                                                                                                                                                                                           |           |      |        |       |                          |                          |                          |                          |                                                                                                                                                                                                                                                                                                                 |           |      |        |       |            |                          |                          |                          |                          |                          |
| <table border="1"> <tr> <td>kaum</td> <td>mittel</td> <td>stark</td> </tr> <tr> <td><input type="checkbox"/></td> <td><input type="checkbox"/></td> <td><input type="checkbox"/></td> </tr> </table> | kaum                                                                                            | mittel                                                                                          | stark                    | <input type="checkbox"/> | <input type="checkbox"/> | <input type="checkbox"/> | <table border="1"> <tr> <td>gar nicht</td> <td>kaum</td> <td>mittel</td> <td>stark</td> </tr> <tr> <td><input type="checkbox"/></td> <td><input type="checkbox"/></td> <td><input type="checkbox"/></td> <td><input type="checkbox"/></td> </tr> </table> | gar nicht | kaum | mittel | stark | <input type="checkbox"/> | <input type="checkbox"/> | <input type="checkbox"/> | <input type="checkbox"/> | <table border="1"> <tr> <td>gar nicht</td> <td>kaum</td> <td>mittel</td> <td>stark</td> <td>sehr stark</td> </tr> <tr> <td><input type="checkbox"/></td> <td><input type="checkbox"/></td> <td><input type="checkbox"/></td> <td><input type="checkbox"/></td> <td><input type="checkbox"/></td> </tr> </table> | gar nicht | kaum | mittel | stark | sehr stark | <input type="checkbox"/> | <input type="checkbox"/> | <input type="checkbox"/> | <input type="checkbox"/> | <input type="checkbox"/> |
| kaum                                                                                                                                                                                                 | mittel                                                                                          | stark                                                                                           |                          |                          |                          |                          |                                                                                                                                                                                                                                                           |           |      |        |       |                          |                          |                          |                          |                                                                                                                                                                                                                                                                                                                 |           |      |        |       |            |                          |                          |                          |                          |                          |
| <input type="checkbox"/>                                                                                                                                                                             | <input type="checkbox"/>                                                                        | <input type="checkbox"/>                                                                        |                          |                          |                          |                          |                                                                                                                                                                                                                                                           |           |      |        |       |                          |                          |                          |                          |                                                                                                                                                                                                                                                                                                                 |           |      |        |       |            |                          |                          |                          |                          |                          |
| gar nicht                                                                                                                                                                                            | kaum                                                                                            | mittel                                                                                          | stark                    |                          |                          |                          |                                                                                                                                                                                                                                                           |           |      |        |       |                          |                          |                          |                          |                                                                                                                                                                                                                                                                                                                 |           |      |        |       |            |                          |                          |                          |                          |                          |
| <input type="checkbox"/>                                                                                                                                                                             | <input type="checkbox"/>                                                                        | <input type="checkbox"/>                                                                        | <input type="checkbox"/> |                          |                          |                          |                                                                                                                                                                                                                                                           |           |      |        |       |                          |                          |                          |                          |                                                                                                                                                                                                                                                                                                                 |           |      |        |       |            |                          |                          |                          |                          |                          |
| gar nicht                                                                                                                                                                                            | kaum                                                                                            | mittel                                                                                          | stark                    | sehr stark               |                          |                          |                                                                                                                                                                                                                                                           |           |      |        |       |                          |                          |                          |                          |                                                                                                                                                                                                                                                                                                                 |           |      |        |       |            |                          |                          |                          |                          |                          |
| <input type="checkbox"/>                                                                                                                                                                             | <input type="checkbox"/>                                                                        | <input type="checkbox"/>                                                                        | <input type="checkbox"/> | <input type="checkbox"/> |                          |                          |                                                                                                                                                                                                                                                           |           |      |        |       |                          |                          |                          |                          |                                                                                                                                                                                                                                                                                                                 |           |      |        |       |            |                          |                          |                          |                          |                          |

|                                                                                                                                                                                                                                                                               |                                                                                                                                                                                                                                                                                                                                                                                                                                                                                                                                                                                                           |
|-------------------------------------------------------------------------------------------------------------------------------------------------------------------------------------------------------------------------------------------------------------------------------|-----------------------------------------------------------------------------------------------------------------------------------------------------------------------------------------------------------------------------------------------------------------------------------------------------------------------------------------------------------------------------------------------------------------------------------------------------------------------------------------------------------------------------------------------------------------------------------------------------------|
| <p><b>CVI : 1,0</b><br/> <b>Umformulierung (Stammfrage)</b><br/> Berücksichtigter Kommentar:</p> <ul style="list-style-type: none"> <li>„Aus meiner Sicht klarere Info: Fühlen sie sich durch folgende Beschwerden beeinträchtigt: Gar nicht, kaum, mittel, stark“</li> </ul> | <p><b>KI:</b><br/> <b>Umformulierung und Unterstreichung (Stammfrage)</b></p> <ul style="list-style-type: none"> <li>Ergänzung „alltäglich“ verdeutlicht den Kontext, in dem die Beeinträchtigung durch die Bewegungsstörung beurteilt werden soll.</li> <li>Unterstreichung unterstützt Betroffene, die Beeinträchtigung konsequent auf ihre Bewegungsfähigkeit zu beziehen.</li> </ul> <p><b>Ergänzung (Antwortmöglichkeit)</b></p> <ul style="list-style-type: none"> <li>Ergänzung „sehr stark“ ermöglicht den Betroffenen eine weitere Differenzierung zwischen „stark“ und „sehr stark“.</li> </ul> |
|-------------------------------------------------------------------------------------------------------------------------------------------------------------------------------------------------------------------------------------------------------------------------------|-----------------------------------------------------------------------------------------------------------------------------------------------------------------------------------------------------------------------------------------------------------------------------------------------------------------------------------------------------------------------------------------------------------------------------------------------------------------------------------------------------------------------------------------------------------------------------------------------------------|

|                                                                                                                                                                                                                                                                                                           |                                                                                                                            |                                                                                                                            |                          |                          |                          |                          |                                                                                                                                                                                                                                                                                                                                                                                    |           |      |        |       |                          |                          |                          |                          |                                                                                                                                                                                                                                                                                                                                                                                                                                                              |           |      |        |       |            |                          |                          |                          |                          |                          |
|-----------------------------------------------------------------------------------------------------------------------------------------------------------------------------------------------------------------------------------------------------------------------------------------------------------|----------------------------------------------------------------------------------------------------------------------------|----------------------------------------------------------------------------------------------------------------------------|--------------------------|--------------------------|--------------------------|--------------------------|------------------------------------------------------------------------------------------------------------------------------------------------------------------------------------------------------------------------------------------------------------------------------------------------------------------------------------------------------------------------------------|-----------|------|--------|-------|--------------------------|--------------------------|--------------------------|--------------------------|--------------------------------------------------------------------------------------------------------------------------------------------------------------------------------------------------------------------------------------------------------------------------------------------------------------------------------------------------------------------------------------------------------------------------------------------------------------|-----------|------|--------|-------|------------|--------------------------|--------------------------|--------------------------|--------------------------|--------------------------|
| <p><b>Version 1:</b><br/> <b>6c. Wie wirken sich folgende Probleme auf Ihre Bewegungsfähigkeit aus?</b></p>                                                                                                                                                                                               | <p><b>Version 2:</b><br/> <b>6c. Fühlen Sie sich durch folgende Beschwerden beeinträchtigt, wenn Sie sich bewegen?</b></p> | <p><b>Version 3:</b><br/> <b>6c. Fühlen Sie bei alltäglichen Bewegungen durch folgende Beschwerden beeinträchtigt?</b></p> |                          |                          |                          |                          |                                                                                                                                                                                                                                                                                                                                                                                    |           |      |        |       |                          |                          |                          |                          |                                                                                                                                                                                                                                                                                                                                                                                                                                                              |           |      |        |       |            |                          |                          |                          |                          |                          |
| Empfindungsstörungen (z. B. Taubheit, Kribbeln, Missempfindungen)                                                                                                                                                                                                                                         | Empfindungsstörungen (z. B. Taubheit, Kribbeln, Missempfindungen)                                                          | Empfindungsstörungen (z. B. Taubheit, Kribbeln, Missempfindungen)                                                          |                          |                          |                          |                          |                                                                                                                                                                                                                                                                                                                                                                                    |           |      |        |       |                          |                          |                          |                          |                                                                                                                                                                                                                                                                                                                                                                                                                                                              |           |      |        |       |            |                          |                          |                          |                          |                          |
| <table border="1" style="width: 100%; text-align: center;"> <tr> <td style="width: 33%;">kaum</td> <td style="width: 33%;">mittel</td> <td style="width: 33%;">stark</td> </tr> <tr> <td><input type="checkbox"/></td> <td><input type="checkbox"/></td> <td><input type="checkbox"/></td> </tr> </table> | kaum                                                                                                                       | mittel                                                                                                                     | stark                    | <input type="checkbox"/> | <input type="checkbox"/> | <input type="checkbox"/> | <table border="1" style="width: 100%; text-align: center;"> <tr> <td style="width: 25%;">gar nicht</td> <td style="width: 25%;">kaum</td> <td style="width: 25%;">mittel</td> <td style="width: 25%;">stark</td> </tr> <tr> <td><input type="checkbox"/></td> <td><input type="checkbox"/></td> <td><input type="checkbox"/></td> <td><input type="checkbox"/></td> </tr> </table> | gar nicht | kaum | mittel | stark | <input type="checkbox"/> | <input type="checkbox"/> | <input type="checkbox"/> | <input type="checkbox"/> | <table border="1" style="width: 100%; text-align: center;"> <tr> <td style="width: 20%;">gar nicht</td> <td style="width: 20%;">kaum</td> <td style="width: 20%;">mittel</td> <td style="width: 20%;">stark</td> <td style="width: 20%;">sehr stark</td> </tr> <tr> <td><input type="checkbox"/></td> <td><input type="checkbox"/></td> <td><input type="checkbox"/></td> <td><input type="checkbox"/></td> <td><input type="checkbox"/></td> </tr> </table> | gar nicht | kaum | mittel | stark | sehr stark | <input type="checkbox"/> | <input type="checkbox"/> | <input type="checkbox"/> | <input type="checkbox"/> | <input type="checkbox"/> |
| kaum                                                                                                                                                                                                                                                                                                      | mittel                                                                                                                     | stark                                                                                                                      |                          |                          |                          |                          |                                                                                                                                                                                                                                                                                                                                                                                    |           |      |        |       |                          |                          |                          |                          |                                                                                                                                                                                                                                                                                                                                                                                                                                                              |           |      |        |       |            |                          |                          |                          |                          |                          |
| <input type="checkbox"/>                                                                                                                                                                                                                                                                                  | <input type="checkbox"/>                                                                                                   | <input type="checkbox"/>                                                                                                   |                          |                          |                          |                          |                                                                                                                                                                                                                                                                                                                                                                                    |           |      |        |       |                          |                          |                          |                          |                                                                                                                                                                                                                                                                                                                                                                                                                                                              |           |      |        |       |            |                          |                          |                          |                          |                          |
| gar nicht                                                                                                                                                                                                                                                                                                 | kaum                                                                                                                       | mittel                                                                                                                     | stark                    |                          |                          |                          |                                                                                                                                                                                                                                                                                                                                                                                    |           |      |        |       |                          |                          |                          |                          |                                                                                                                                                                                                                                                                                                                                                                                                                                                              |           |      |        |       |            |                          |                          |                          |                          |                          |
| <input type="checkbox"/>                                                                                                                                                                                                                                                                                  | <input type="checkbox"/>                                                                                                   | <input type="checkbox"/>                                                                                                   | <input type="checkbox"/> |                          |                          |                          |                                                                                                                                                                                                                                                                                                                                                                                    |           |      |        |       |                          |                          |                          |                          |                                                                                                                                                                                                                                                                                                                                                                                                                                                              |           |      |        |       |            |                          |                          |                          |                          |                          |
| gar nicht                                                                                                                                                                                                                                                                                                 | kaum                                                                                                                       | mittel                                                                                                                     | stark                    | sehr stark               |                          |                          |                                                                                                                                                                                                                                                                                                                                                                                    |           |      |        |       |                          |                          |                          |                          |                                                                                                                                                                                                                                                                                                                                                                                                                                                              |           |      |        |       |            |                          |                          |                          |                          |                          |
| <input type="checkbox"/>                                                                                                                                                                                                                                                                                  | <input type="checkbox"/>                                                                                                   | <input type="checkbox"/>                                                                                                   | <input type="checkbox"/> | <input type="checkbox"/> |                          |                          |                                                                                                                                                                                                                                                                                                                                                                                    |           |      |        |       |                          |                          |                          |                          |                                                                                                                                                                                                                                                                                                                                                                                                                                                              |           |      |        |       |            |                          |                          |                          |                          |                          |

|                                                                                                                                                                                                                                                                                |                                                                                                                                                                                                                                                                                                                                                                                                                                                                                                                                                                                                          |
|--------------------------------------------------------------------------------------------------------------------------------------------------------------------------------------------------------------------------------------------------------------------------------|----------------------------------------------------------------------------------------------------------------------------------------------------------------------------------------------------------------------------------------------------------------------------------------------------------------------------------------------------------------------------------------------------------------------------------------------------------------------------------------------------------------------------------------------------------------------------------------------------------|
| <p><b>CVI : 0,86</b><br/> <b>Umformulierung (Stammfrage)</b><br/> Berücksichtigter Kommentar:</p> <ul style="list-style-type: none"> <li>„Aus meiner Sicht klarere Info: Fühlen sie sich durch folgende Beschwerden beeinträchtigt: Gar nicht, kaum, mittel, stark“</li> </ul> | <p><b>KI:</b><br/> <b>Umformulierung und Unterstreichung (Stammfrage)</b></p> <ul style="list-style-type: none"> <li>Ergänzung „im Alltag“ verdeutlicht den Kontext, in dem die Beeinträchtigung durch die Bewegungsstörung beurteilt werden soll.</li> <li>Unterstreichung unterstützt Betroffene, die Beeinträchtigung konsequent auf ihre Bewegungsfähigkeit zu beziehen.</li> </ul> <p><b>Ergänzung (Antwortmöglichkeit)</b></p> <ul style="list-style-type: none"> <li>Ergänzung „sehr stark“ ermöglicht den Betroffenen eine weitere Differenzierung zwischen „stark“ und „sehr stark“.</li> </ul> |
|--------------------------------------------------------------------------------------------------------------------------------------------------------------------------------------------------------------------------------------------------------------------------------|----------------------------------------------------------------------------------------------------------------------------------------------------------------------------------------------------------------------------------------------------------------------------------------------------------------------------------------------------------------------------------------------------------------------------------------------------------------------------------------------------------------------------------------------------------------------------------------------------------|

|                                                                                                                                                                                                      |                                                                                                     |                                                                                                     |                          |                          |                          |                          |                                                                                                                                                                                                                                                           |           |      |        |       |                          |                          |                          |                          |                                                                                                                                                                                                                                                                                                                 |           |      |        |       |            |                          |                          |                          |                          |                          |
|------------------------------------------------------------------------------------------------------------------------------------------------------------------------------------------------------|-----------------------------------------------------------------------------------------------------|-----------------------------------------------------------------------------------------------------|--------------------------|--------------------------|--------------------------|--------------------------|-----------------------------------------------------------------------------------------------------------------------------------------------------------------------------------------------------------------------------------------------------------|-----------|------|--------|-------|--------------------------|--------------------------|--------------------------|--------------------------|-----------------------------------------------------------------------------------------------------------------------------------------------------------------------------------------------------------------------------------------------------------------------------------------------------------------|-----------|------|--------|-------|------------|--------------------------|--------------------------|--------------------------|--------------------------|--------------------------|
| Version 1:<br>6f. Wie wirken sich folgende Probleme auf Ihre Bewegungsfähigkeit aus?                                                                                                                 | Version 2:<br>6d. Fühlen Sie sich durch folgende Beschwerden beeinträchtigt, wenn Sie sich bewegen? | Version 3:<br>6d. Fühlen Sie bei alltäglichen Bewegungen durch folgende Beschwerden beeinträchtigt? |                          |                          |                          |                          |                                                                                                                                                                                                                                                           |           |      |        |       |                          |                          |                          |                          |                                                                                                                                                                                                                                                                                                                 |           |      |        |       |            |                          |                          |                          |                          |                          |
| Allgemeine körperliche Erschöpfung                                                                                                                                                                   | Allgemeine körperliche Erschöpfung                                                                  | Allgemeine körperliche Erschöpfung                                                                  |                          |                          |                          |                          |                                                                                                                                                                                                                                                           |           |      |        |       |                          |                          |                          |                          |                                                                                                                                                                                                                                                                                                                 |           |      |        |       |            |                          |                          |                          |                          |                          |
| <table border="1"> <tr> <td>kaum</td> <td>mittel</td> <td>stark</td> </tr> <tr> <td><input type="checkbox"/></td> <td><input type="checkbox"/></td> <td><input type="checkbox"/></td> </tr> </table> | kaum                                                                                                | mittel                                                                                              | stark                    | <input type="checkbox"/> | <input type="checkbox"/> | <input type="checkbox"/> | <table border="1"> <tr> <td>gar nicht</td> <td>kaum</td> <td>mittel</td> <td>stark</td> </tr> <tr> <td><input type="checkbox"/></td> <td><input type="checkbox"/></td> <td><input type="checkbox"/></td> <td><input type="checkbox"/></td> </tr> </table> | gar nicht | kaum | mittel | stark | <input type="checkbox"/> | <input type="checkbox"/> | <input type="checkbox"/> | <input type="checkbox"/> | <table border="1"> <tr> <td>gar nicht</td> <td>kaum</td> <td>mittel</td> <td>stark</td> <td>sehr stark</td> </tr> <tr> <td><input type="checkbox"/></td> <td><input type="checkbox"/></td> <td><input type="checkbox"/></td> <td><input type="checkbox"/></td> <td><input type="checkbox"/></td> </tr> </table> | gar nicht | kaum | mittel | stark | sehr stark | <input type="checkbox"/> | <input type="checkbox"/> | <input type="checkbox"/> | <input type="checkbox"/> | <input type="checkbox"/> |
| kaum                                                                                                                                                                                                 | mittel                                                                                              | stark                                                                                               |                          |                          |                          |                          |                                                                                                                                                                                                                                                           |           |      |        |       |                          |                          |                          |                          |                                                                                                                                                                                                                                                                                                                 |           |      |        |       |            |                          |                          |                          |                          |                          |
| <input type="checkbox"/>                                                                                                                                                                             | <input type="checkbox"/>                                                                            | <input type="checkbox"/>                                                                            |                          |                          |                          |                          |                                                                                                                                                                                                                                                           |           |      |        |       |                          |                          |                          |                          |                                                                                                                                                                                                                                                                                                                 |           |      |        |       |            |                          |                          |                          |                          |                          |
| gar nicht                                                                                                                                                                                            | kaum                                                                                                | mittel                                                                                              | stark                    |                          |                          |                          |                                                                                                                                                                                                                                                           |           |      |        |       |                          |                          |                          |                          |                                                                                                                                                                                                                                                                                                                 |           |      |        |       |            |                          |                          |                          |                          |                          |
| <input type="checkbox"/>                                                                                                                                                                             | <input type="checkbox"/>                                                                            | <input type="checkbox"/>                                                                            | <input type="checkbox"/> |                          |                          |                          |                                                                                                                                                                                                                                                           |           |      |        |       |                          |                          |                          |                          |                                                                                                                                                                                                                                                                                                                 |           |      |        |       |            |                          |                          |                          |                          |                          |
| gar nicht                                                                                                                                                                                            | kaum                                                                                                | mittel                                                                                              | stark                    | sehr stark               |                          |                          |                                                                                                                                                                                                                                                           |           |      |        |       |                          |                          |                          |                          |                                                                                                                                                                                                                                                                                                                 |           |      |        |       |            |                          |                          |                          |                          |                          |
| <input type="checkbox"/>                                                                                                                                                                             | <input type="checkbox"/>                                                                            | <input type="checkbox"/>                                                                            | <input type="checkbox"/> | <input type="checkbox"/> |                          |                          |                                                                                                                                                                                                                                                           |           |      |        |       |                          |                          |                          |                          |                                                                                                                                                                                                                                                                                                                 |           |      |        |       |            |                          |                          |                          |                          |                          |

|                                                                                                                                                                                                                                                                    |                                                                                                                                                                                                                                                                                                                                                                                                                                                                                                                                                                                           |
|--------------------------------------------------------------------------------------------------------------------------------------------------------------------------------------------------------------------------------------------------------------------|-------------------------------------------------------------------------------------------------------------------------------------------------------------------------------------------------------------------------------------------------------------------------------------------------------------------------------------------------------------------------------------------------------------------------------------------------------------------------------------------------------------------------------------------------------------------------------------------|
| <b>CVI : 1,0</b><br><b>Umformulierung (Stammfrage)</b><br>Berücksichtigter Kommentar: <ul style="list-style-type: none"> <li>„Aus meiner Sicht klarere Info: Fühlen sie sich durch folgende Beschwerden beeinträchtigt: Gar nicht, kaum, mittel, stark“</li> </ul> | <b>KI:</b><br><b>Umformulierung und Unterstreichung (Stammfrage)</b> <ul style="list-style-type: none"> <li>Ergänzung „alltäglich“ verdeutlicht den Kontext, in dem die Beeinträchtigung durch die Bewegungsstörung beurteilt werden soll.</li> <li>Unterstreichung unterstützt Betroffene, die Beeinträchtigung konsequent auf ihre Bewegungsfähigkeit zu beziehen.</li> </ul> <b>Ergänzung (Antwortmöglichkeit)</b> <ul style="list-style-type: none"> <li>Ergänzung „sehr stark“ ermöglicht den Betroffenen eine weitere Differenzierung zwischen „stark“ und „sehr stark“.</li> </ul> |
|--------------------------------------------------------------------------------------------------------------------------------------------------------------------------------------------------------------------------------------------------------------------|-------------------------------------------------------------------------------------------------------------------------------------------------------------------------------------------------------------------------------------------------------------------------------------------------------------------------------------------------------------------------------------------------------------------------------------------------------------------------------------------------------------------------------------------------------------------------------------------|

|                                                                                                                                                                                                      |                                                                                                     |                                                                                                     |                          |                          |                          |                          |                                                                                                                                                                                                                                                           |           |      |        |       |                          |                          |                          |                          |                                                                                                                                                                                                                                                                                                                 |           |      |        |       |            |                          |                          |                          |                          |                          |
|------------------------------------------------------------------------------------------------------------------------------------------------------------------------------------------------------|-----------------------------------------------------------------------------------------------------|-----------------------------------------------------------------------------------------------------|--------------------------|--------------------------|--------------------------|--------------------------|-----------------------------------------------------------------------------------------------------------------------------------------------------------------------------------------------------------------------------------------------------------|-----------|------|--------|-------|--------------------------|--------------------------|--------------------------|--------------------------|-----------------------------------------------------------------------------------------------------------------------------------------------------------------------------------------------------------------------------------------------------------------------------------------------------------------|-----------|------|--------|-------|------------|--------------------------|--------------------------|--------------------------|--------------------------|--------------------------|
| Version 1:<br>6g. Wie wirken sich folgende Probleme auf Ihre Bewegungsfähigkeit aus?                                                                                                                 | Version 2:<br>6e. Fühlen Sie sich durch folgende Beschwerden beeinträchtigt, wenn Sie sich bewegen? | Version 3:<br>6e. Fühlen Sie bei alltäglichen Bewegungen durch folgende Beschwerden beeinträchtigt? |                          |                          |                          |                          |                                                                                                                                                                                                                                                           |           |      |        |       |                          |                          |                          |                          |                                                                                                                                                                                                                                                                                                                 |           |      |        |       |            |                          |                          |                          |                          |                          |
| Konzentrationsstörung oder geistige Umnebelung                                                                                                                                                       | Konzentrationsstörung                                                                               | Konzentrationsstörung                                                                               |                          |                          |                          |                          |                                                                                                                                                                                                                                                           |           |      |        |       |                          |                          |                          |                          |                                                                                                                                                                                                                                                                                                                 |           |      |        |       |            |                          |                          |                          |                          |                          |
| <table border="1"> <tr> <td>kaum</td> <td>mittel</td> <td>stark</td> </tr> <tr> <td><input type="checkbox"/></td> <td><input type="checkbox"/></td> <td><input type="checkbox"/></td> </tr> </table> | kaum                                                                                                | mittel                                                                                              | stark                    | <input type="checkbox"/> | <input type="checkbox"/> | <input type="checkbox"/> | <table border="1"> <tr> <td>gar nicht</td> <td>kaum</td> <td>mittel</td> <td>stark</td> </tr> <tr> <td><input type="checkbox"/></td> <td><input type="checkbox"/></td> <td><input type="checkbox"/></td> <td><input type="checkbox"/></td> </tr> </table> | gar nicht | kaum | mittel | stark | <input type="checkbox"/> | <input type="checkbox"/> | <input type="checkbox"/> | <input type="checkbox"/> | <table border="1"> <tr> <td>gar nicht</td> <td>kaum</td> <td>mittel</td> <td>stark</td> <td>sehr stark</td> </tr> <tr> <td><input type="checkbox"/></td> <td><input type="checkbox"/></td> <td><input type="checkbox"/></td> <td><input type="checkbox"/></td> <td><input type="checkbox"/></td> </tr> </table> | gar nicht | kaum | mittel | stark | sehr stark | <input type="checkbox"/> | <input type="checkbox"/> | <input type="checkbox"/> | <input type="checkbox"/> | <input type="checkbox"/> |
| kaum                                                                                                                                                                                                 | mittel                                                                                              | stark                                                                                               |                          |                          |                          |                          |                                                                                                                                                                                                                                                           |           |      |        |       |                          |                          |                          |                          |                                                                                                                                                                                                                                                                                                                 |           |      |        |       |            |                          |                          |                          |                          |                          |
| <input type="checkbox"/>                                                                                                                                                                             | <input type="checkbox"/>                                                                            | <input type="checkbox"/>                                                                            |                          |                          |                          |                          |                                                                                                                                                                                                                                                           |           |      |        |       |                          |                          |                          |                          |                                                                                                                                                                                                                                                                                                                 |           |      |        |       |            |                          |                          |                          |                          |                          |
| gar nicht                                                                                                                                                                                            | kaum                                                                                                | mittel                                                                                              | stark                    |                          |                          |                          |                                                                                                                                                                                                                                                           |           |      |        |       |                          |                          |                          |                          |                                                                                                                                                                                                                                                                                                                 |           |      |        |       |            |                          |                          |                          |                          |                          |
| <input type="checkbox"/>                                                                                                                                                                             | <input type="checkbox"/>                                                                            | <input type="checkbox"/>                                                                            | <input type="checkbox"/> |                          |                          |                          |                                                                                                                                                                                                                                                           |           |      |        |       |                          |                          |                          |                          |                                                                                                                                                                                                                                                                                                                 |           |      |        |       |            |                          |                          |                          |                          |                          |
| gar nicht                                                                                                                                                                                            | kaum                                                                                                | mittel                                                                                              | stark                    | sehr stark               |                          |                          |                                                                                                                                                                                                                                                           |           |      |        |       |                          |                          |                          |                          |                                                                                                                                                                                                                                                                                                                 |           |      |        |       |            |                          |                          |                          |                          |                          |
| <input type="checkbox"/>                                                                                                                                                                             | <input type="checkbox"/>                                                                            | <input type="checkbox"/>                                                                            | <input type="checkbox"/> | <input type="checkbox"/> |                          |                          |                                                                                                                                                                                                                                                           |           |      |        |       |                          |                          |                          |                          |                                                                                                                                                                                                                                                                                                                 |           |      |        |       |            |                          |                          |                          |                          |                          |

|                                                                                                                                                                                                                                                                                                                                                                                                        |                                                                                                                                                                                                                                                                                                                                                                                                                                                                                                                                                                                                                 |
|--------------------------------------------------------------------------------------------------------------------------------------------------------------------------------------------------------------------------------------------------------------------------------------------------------------------------------------------------------------------------------------------------------|-----------------------------------------------------------------------------------------------------------------------------------------------------------------------------------------------------------------------------------------------------------------------------------------------------------------------------------------------------------------------------------------------------------------------------------------------------------------------------------------------------------------------------------------------------------------------------------------------------------------|
| <p><b>CVI : 0,86</b><br/> <b>Umformulierung (Einzelitem und Stammfrage)</b><br/> Berücksichtigte Kommentare:</p> <ul style="list-style-type: none"> <li>• „Aus meiner Sicht klarere Info: Fühlen sie sich durch folgende Beschwerden beeinträchtigt: Gar nicht, kaum, mittel, stark“</li> <li>• „Zwischen Benommenheit (6a) und geistiger Umnebelung zu differenzieren ist herausfordernd.“</li> </ul> | <p><b>KI:</b><br/> <b>Umformulierung und Unterstreichung (Stammfrage)</b></p> <ul style="list-style-type: none"> <li>• Ergänzung „alltäglich“ verdeutlicht den Kontext, in dem die Beeinträchtigung durch die Bewegungsstörung beurteilt werden soll.</li> <li>• Unterstreichung unterstützt Betroffene, die Beeinträchtigung konsequent auf ihre Bewegungsfähigkeit zu beziehen.</li> </ul> <p><b>Ergänzung (Antwortmöglichkeit)</b></p> <ul style="list-style-type: none"> <li>• Ergänzung „sehr stark“ ermöglicht den Betroffenen eine weitere Differenzierung zwischen „stark“ und „sehr stark“.</li> </ul> |
|--------------------------------------------------------------------------------------------------------------------------------------------------------------------------------------------------------------------------------------------------------------------------------------------------------------------------------------------------------------------------------------------------------|-----------------------------------------------------------------------------------------------------------------------------------------------------------------------------------------------------------------------------------------------------------------------------------------------------------------------------------------------------------------------------------------------------------------------------------------------------------------------------------------------------------------------------------------------------------------------------------------------------------------|

|                                                                                                                                                                                                                                                                                                           |                                                                                                                            |                                                                                                                            |                          |                          |                          |                          |                                                                                                                                                                                                                                                                                                                                                                                           |                  |      |        |       |                          |                          |                          |                          |                                                                                                                                                                                                                                                                                                                                                                                                                                                                            |                  |      |        |       |                   |                          |                          |                          |                          |                          |
|-----------------------------------------------------------------------------------------------------------------------------------------------------------------------------------------------------------------------------------------------------------------------------------------------------------|----------------------------------------------------------------------------------------------------------------------------|----------------------------------------------------------------------------------------------------------------------------|--------------------------|--------------------------|--------------------------|--------------------------|-------------------------------------------------------------------------------------------------------------------------------------------------------------------------------------------------------------------------------------------------------------------------------------------------------------------------------------------------------------------------------------------|------------------|------|--------|-------|--------------------------|--------------------------|--------------------------|--------------------------|----------------------------------------------------------------------------------------------------------------------------------------------------------------------------------------------------------------------------------------------------------------------------------------------------------------------------------------------------------------------------------------------------------------------------------------------------------------------------|------------------|------|--------|-------|-------------------|--------------------------|--------------------------|--------------------------|--------------------------|--------------------------|
| <p><b>Version 1:</b><br/> <b>6h. Wie wirken sich folgende Probleme auf Ihre Bewegungsfähigkeit aus?</b></p>                                                                                                                                                                                               | <p><b>Version 2:</b><br/> <b>6f. Fühlen Sie sich durch folgende Beschwerden beeinträchtigt, wenn Sie sich bewegen?</b></p> | <p><b>Version 3:</b><br/> <b>6f. Fühlen Sie bei alltäglichen Bewegungen durch folgende Beschwerden beeinträchtigt?</b></p> |                          |                          |                          |                          |                                                                                                                                                                                                                                                                                                                                                                                           |                  |      |        |       |                          |                          |                          |                          |                                                                                                                                                                                                                                                                                                                                                                                                                                                                            |                  |      |        |       |                   |                          |                          |                          |                          |                          |
| Angst zu stürzen oder mich zu verletzen                                                                                                                                                                                                                                                                   | Angst zu stürzen oder <b>sich</b> zu verletzen                                                                             | Angst zu stürzen oder sich zu verletzen                                                                                    |                          |                          |                          |                          |                                                                                                                                                                                                                                                                                                                                                                                           |                  |      |        |       |                          |                          |                          |                          |                                                                                                                                                                                                                                                                                                                                                                                                                                                                            |                  |      |        |       |                   |                          |                          |                          |                          |                          |
| <table border="1" style="width: 100%; text-align: center;"> <tr> <td style="width: 33%;">kaum</td> <td style="width: 33%;">mittel</td> <td style="width: 33%;">stark</td> </tr> <tr> <td><input type="checkbox"/></td> <td><input type="checkbox"/></td> <td><input type="checkbox"/></td> </tr> </table> | kaum                                                                                                                       | mittel                                                                                                                     | stark                    | <input type="checkbox"/> | <input type="checkbox"/> | <input type="checkbox"/> | <table border="1" style="width: 100%; text-align: center;"> <tr> <td style="width: 25%;"><b>gar nicht</b></td> <td style="width: 25%;">kaum</td> <td style="width: 25%;">mittel</td> <td style="width: 25%;">stark</td> </tr> <tr> <td><input type="checkbox"/></td> <td><input type="checkbox"/></td> <td><input type="checkbox"/></td> <td><input type="checkbox"/></td> </tr> </table> | <b>gar nicht</b> | kaum | mittel | stark | <input type="checkbox"/> | <input type="checkbox"/> | <input type="checkbox"/> | <input type="checkbox"/> | <table border="1" style="width: 100%; text-align: center;"> <tr> <td style="width: 20%;"><b>gar nicht</b></td> <td style="width: 20%;">kaum</td> <td style="width: 20%;">mittel</td> <td style="width: 20%;">stark</td> <td style="width: 20%;"><b>sehr stark</b></td> </tr> <tr> <td><input type="checkbox"/></td> <td><input type="checkbox"/></td> <td><input type="checkbox"/></td> <td><input type="checkbox"/></td> <td><input type="checkbox"/></td> </tr> </table> | <b>gar nicht</b> | kaum | mittel | stark | <b>sehr stark</b> | <input type="checkbox"/> | <input type="checkbox"/> | <input type="checkbox"/> | <input type="checkbox"/> | <input type="checkbox"/> |
| kaum                                                                                                                                                                                                                                                                                                      | mittel                                                                                                                     | stark                                                                                                                      |                          |                          |                          |                          |                                                                                                                                                                                                                                                                                                                                                                                           |                  |      |        |       |                          |                          |                          |                          |                                                                                                                                                                                                                                                                                                                                                                                                                                                                            |                  |      |        |       |                   |                          |                          |                          |                          |                          |
| <input type="checkbox"/>                                                                                                                                                                                                                                                                                  | <input type="checkbox"/>                                                                                                   | <input type="checkbox"/>                                                                                                   |                          |                          |                          |                          |                                                                                                                                                                                                                                                                                                                                                                                           |                  |      |        |       |                          |                          |                          |                          |                                                                                                                                                                                                                                                                                                                                                                                                                                                                            |                  |      |        |       |                   |                          |                          |                          |                          |                          |
| <b>gar nicht</b>                                                                                                                                                                                                                                                                                          | kaum                                                                                                                       | mittel                                                                                                                     | stark                    |                          |                          |                          |                                                                                                                                                                                                                                                                                                                                                                                           |                  |      |        |       |                          |                          |                          |                          |                                                                                                                                                                                                                                                                                                                                                                                                                                                                            |                  |      |        |       |                   |                          |                          |                          |                          |                          |
| <input type="checkbox"/>                                                                                                                                                                                                                                                                                  | <input type="checkbox"/>                                                                                                   | <input type="checkbox"/>                                                                                                   | <input type="checkbox"/> |                          |                          |                          |                                                                                                                                                                                                                                                                                                                                                                                           |                  |      |        |       |                          |                          |                          |                          |                                                                                                                                                                                                                                                                                                                                                                                                                                                                            |                  |      |        |       |                   |                          |                          |                          |                          |                          |
| <b>gar nicht</b>                                                                                                                                                                                                                                                                                          | kaum                                                                                                                       | mittel                                                                                                                     | stark                    | <b>sehr stark</b>        |                          |                          |                                                                                                                                                                                                                                                                                                                                                                                           |                  |      |        |       |                          |                          |                          |                          |                                                                                                                                                                                                                                                                                                                                                                                                                                                                            |                  |      |        |       |                   |                          |                          |                          |                          |                          |
| <input type="checkbox"/>                                                                                                                                                                                                                                                                                  | <input type="checkbox"/>                                                                                                   | <input type="checkbox"/>                                                                                                   | <input type="checkbox"/> | <input type="checkbox"/> |                          |                          |                                                                                                                                                                                                                                                                                                                                                                                           |                  |      |        |       |                          |                          |                          |                          |                                                                                                                                                                                                                                                                                                                                                                                                                                                                            |                  |      |        |       |                   |                          |                          |                          |                          |                          |

|                                                                                                                                                                                                                                                                                                                                                      |                                                                                                                                                                                                                                                                                                                                                                                                                                                                                                                                                                                                                 |
|------------------------------------------------------------------------------------------------------------------------------------------------------------------------------------------------------------------------------------------------------------------------------------------------------------------------------------------------------|-----------------------------------------------------------------------------------------------------------------------------------------------------------------------------------------------------------------------------------------------------------------------------------------------------------------------------------------------------------------------------------------------------------------------------------------------------------------------------------------------------------------------------------------------------------------------------------------------------------------|
| <p><b>CVI : 1,0</b><br/> <b>Umformulierung (Stammfrage und Einzelitem)</b><br/> Berücksichtigte Kommentare:</p> <ul style="list-style-type: none"> <li>• „Aus meiner Sicht klarere Info: Fühlen sie sich durch folgende Beschwerden beeinträchtigt: Gar nicht, kaum, mittel, stark“</li> <li>• „Angst zu stürzen oder sich zu verletzen?“</li> </ul> | <p><b>KI:</b><br/> <b>Umformulierung und Unterstreichung (Stammfrage)</b></p> <ul style="list-style-type: none"> <li>• Ergänzung „alltäglich“ verdeutlicht den Kontext, in dem die Beeinträchtigung durch die Bewegungsstörung beurteilt werden soll.</li> <li>• Unterstreichung unterstützt Betroffene, die Beeinträchtigung konsequent auf ihre Bewegungsfähigkeit zu beziehen.</li> </ul> <p><b>Ergänzung (Antwortmöglichkeit)</b></p> <ul style="list-style-type: none"> <li>• Ergänzung „sehr stark“ ermöglicht den Betroffenen eine weitere Differenzierung zwischen „stark“ und „sehr stark“.</li> </ul> |
|------------------------------------------------------------------------------------------------------------------------------------------------------------------------------------------------------------------------------------------------------------------------------------------------------------------------------------------------------|-----------------------------------------------------------------------------------------------------------------------------------------------------------------------------------------------------------------------------------------------------------------------------------------------------------------------------------------------------------------------------------------------------------------------------------------------------------------------------------------------------------------------------------------------------------------------------------------------------------------|

|                                                                                                           |                                                                                                                |                                                                                                                       |                          |
|-----------------------------------------------------------------------------------------------------------|----------------------------------------------------------------------------------------------------------------|-----------------------------------------------------------------------------------------------------------------------|--------------------------|
| <b>7a. Version 1:</b><br>Wie stark wirkt sich Ihre Bewegungsstörung auf folgende Bereiche des Lebens aus? | <b>7a. Version 2:</b><br>Wie stark <b>beeinträchtigt</b> Ihre Bewegungsstörung folgende Bereiche Ihres Lebens? | <b>7a. Version 3:</b><br>Wie stark beeinträchtigt <b>Ihre</b> <b>Bewegungsstörung</b> folgende Bereiche Ihres Lebens? |                          |
| Soziale Aktivitäten (Freunde, Familie)                                                                    |                                                                                                                |                                                                                                                       |                          |
| Kaum                                                                                                      | mittel                                                                                                         | stark                                                                                                                 | Kann ich nicht sagen     |
| <input type="checkbox"/>                                                                                  | <input type="checkbox"/>                                                                                       | <input type="checkbox"/>                                                                                              | <input type="checkbox"/> |

|                                                                                                                |                                                                                                                       |
|----------------------------------------------------------------------------------------------------------------|-----------------------------------------------------------------------------------------------------------------------|
| <b>7a. Version 2:</b><br>Wie stark <b>beeinträchtigt</b> Ihre Bewegungsstörung folgende Bereiche Ihres Lebens? | <b>7a. Version 3:</b><br>Wie stark beeinträchtigt <b>Ihre</b> <b>Bewegungsstörung</b> folgende Bereiche Ihres Lebens? |
| Soziale Aktivitäten (Freunde, Familie)                                                                         |                                                                                                                       |
| <b>gar nicht</b>                                                                                               | <b>trifft nicht zu</b>                                                                                                |
| kaum                                                                                                           | stark                                                                                                                 |
| <input type="checkbox"/>                                                                                       | <input type="checkbox"/>                                                                                              |

|                                                                                                                       |                                                                                                                |
|-----------------------------------------------------------------------------------------------------------------------|----------------------------------------------------------------------------------------------------------------|
| <b>7a. Version 3:</b><br>Wie stark beeinträchtigt <b>Ihre</b> <b>Bewegungsstörung</b> folgende Bereiche Ihres Lebens? | <b>7a. Version 2:</b><br>Wie stark <b>beeinträchtigt</b> Ihre Bewegungsstörung folgende Bereiche Ihres Lebens? |
| Soziale Aktivitäten (Freunde, Familie)                                                                                |                                                                                                                |
| <b>gar nicht</b>                                                                                                      | <b>trifft nicht zu</b>                                                                                         |
| kaum                                                                                                                  | stark                                                                                                          |
| <input type="checkbox"/>                                                                                              | <input type="checkbox"/>                                                                                       |

|                                                                                                                                                                                                                      |                                                                                                                                                                                                                     |
|----------------------------------------------------------------------------------------------------------------------------------------------------------------------------------------------------------------------|---------------------------------------------------------------------------------------------------------------------------------------------------------------------------------------------------------------------|
| <b>CVI : 1,0</b><br><b>Umformulierung (Stammfrage)</b><br>Berücksichtigte Kommentare: <ul style="list-style-type: none"> <li>• „Beeinträchtigt?“</li> <li>• „Kategorien: gar nicht, kaum, mittel, stark?“</li> </ul> | <b>KI:</b><br><b>Unterstreichung (Stammfrage)</b> <ul style="list-style-type: none"> <li>• Unterstreichung unterstützt Betroffene, die Beeinträchtigung konsequent auf die Bewegungsstörung zu beziehen.</li> </ul> |
|----------------------------------------------------------------------------------------------------------------------------------------------------------------------------------------------------------------------|---------------------------------------------------------------------------------------------------------------------------------------------------------------------------------------------------------------------|

|                                                                                                           |                                                                                                                |                                                                                                                       |                          |
|-----------------------------------------------------------------------------------------------------------|----------------------------------------------------------------------------------------------------------------|-----------------------------------------------------------------------------------------------------------------------|--------------------------|
| <b>7b. Version 1:</b><br>Wie stark wirkt sich Ihre Bewegungsstörung auf folgende Bereiche des Lebens aus? | <b>7b. Version 2:</b><br>Wie stark <b>beeinträchtigt</b> Ihre Bewegungsstörung folgende Bereiche Ihres Lebens? | <b>7b. Version 3:</b><br>Wie stark beeinträchtigt <b>Ihre</b> <b>Bewegungsstörung</b> folgende Bereiche Ihres Lebens? |                          |
| Partnerschaft und Intimität                                                                               |                                                                                                                |                                                                                                                       |                          |
| Kaum                                                                                                      | mittel                                                                                                         | stark                                                                                                                 | Kann ich nicht sagen     |
| <input type="checkbox"/>                                                                                  | <input type="checkbox"/>                                                                                       | <input type="checkbox"/>                                                                                              | <input type="checkbox"/> |

|                                                                                                                |                                                                                                                       |
|----------------------------------------------------------------------------------------------------------------|-----------------------------------------------------------------------------------------------------------------------|
| <b>7b. Version 2:</b><br>Wie stark <b>beeinträchtigt</b> Ihre Bewegungsstörung folgende Bereiche Ihres Lebens? | <b>7b. Version 3:</b><br>Wie stark beeinträchtigt <b>Ihre</b> <b>Bewegungsstörung</b> folgende Bereiche Ihres Lebens? |
| Partnerschaft und Intimität                                                                                    |                                                                                                                       |
| <b>gar nicht</b>                                                                                               | <b>trifft nicht zu</b>                                                                                                |
| kaum                                                                                                           | stark                                                                                                                 |
| <input type="checkbox"/>                                                                                       | <input type="checkbox"/>                                                                                              |

|                                                                                                                       |                                                                                                                |
|-----------------------------------------------------------------------------------------------------------------------|----------------------------------------------------------------------------------------------------------------|
| <b>7b. Version 3:</b><br>Wie stark beeinträchtigt <b>Ihre</b> <b>Bewegungsstörung</b> folgende Bereiche Ihres Lebens? | <b>7b. Version 2:</b><br>Wie stark <b>beeinträchtigt</b> Ihre Bewegungsstörung folgende Bereiche Ihres Lebens? |
| Partnerschaft und Intimität                                                                                           |                                                                                                                |
| <b>gar nicht</b>                                                                                                      | <b>trifft nicht zu</b>                                                                                         |
| kaum                                                                                                                  | stark                                                                                                          |
| <input type="checkbox"/>                                                                                              | <input type="checkbox"/>                                                                                       |

|                                                                                                                                                                                                                      |                                                                                                                                                                                                                     |
|----------------------------------------------------------------------------------------------------------------------------------------------------------------------------------------------------------------------|---------------------------------------------------------------------------------------------------------------------------------------------------------------------------------------------------------------------|
| <b>CVI : 1,0</b><br><b>Umformulierung (Stammfrage)</b><br>Berücksichtigte Kommentare: <ul style="list-style-type: none"> <li>• „Beeinträchtigt?“</li> <li>• „Kategorien: gar nicht, kaum, mittel, stark?“</li> </ul> | <b>KI:</b><br><b>Unterstreichung (Stammfrage)</b> <ul style="list-style-type: none"> <li>• Unterstreichung unterstützt Betroffene, die Beeinträchtigung konsequent auf die Bewegungsstörung zu beziehen.</li> </ul> |
|----------------------------------------------------------------------------------------------------------------------------------------------------------------------------------------------------------------------|---------------------------------------------------------------------------------------------------------------------------------------------------------------------------------------------------------------------|

|                                                                                                           |                                                                                                                |                                                                                                                |                          |
|-----------------------------------------------------------------------------------------------------------|----------------------------------------------------------------------------------------------------------------|----------------------------------------------------------------------------------------------------------------|--------------------------|
| <b>7c. Version 1:</b><br>Wie stark wirkt sich Ihre Bewegungsstörung auf folgende Bereiche des Lebens aus? | <b>7c. Version 2:</b><br>Wie stark <b>beeinträchtigt</b> Ihre Bewegungsstörung folgende Bereiche Ihres Lebens? | <b>7c. Version 3:</b><br>Wie stark beeinträchtigt <b>Ihre Bewegungsstörung</b> folgende Bereiche Ihres Lebens? |                          |
| Freizeitgestaltung (Hobbies, Unterhaltung)                                                                |                                                                                                                |                                                                                                                |                          |
| Kaum                                                                                                      | mittel                                                                                                         | stark                                                                                                          | Kann ich nicht sagen     |
| <input type="checkbox"/>                                                                                  | <input type="checkbox"/>                                                                                       | <input type="checkbox"/>                                                                                       | <input type="checkbox"/> |

|                          |                          |                          |                          |                          |
|--------------------------|--------------------------|--------------------------|--------------------------|--------------------------|
| <b>gar nicht</b>         | kaum                     | mittel                   | stark                    | <b>trifft nicht zu</b>   |
| <input type="checkbox"/> | <input type="checkbox"/> | <input type="checkbox"/> | <input type="checkbox"/> | <input type="checkbox"/> |

|                          |                          |                          |                          |                          |
|--------------------------|--------------------------|--------------------------|--------------------------|--------------------------|
| <b>gar nicht</b>         | kaum                     | mittel                   | stark                    | <b>trifft nicht zu</b>   |
| <input type="checkbox"/> | <input type="checkbox"/> | <input type="checkbox"/> | <input type="checkbox"/> | <input type="checkbox"/> |

|                                                                                                                                                                                                                      |                                                                                                                                                                                                                     |
|----------------------------------------------------------------------------------------------------------------------------------------------------------------------------------------------------------------------|---------------------------------------------------------------------------------------------------------------------------------------------------------------------------------------------------------------------|
| <b>CVI : 1,0</b><br><b>Umformulierung (Stammfrage)</b><br>Berücksichtigte Kommentare: <ul style="list-style-type: none"> <li>• „Beeinträchtigt?“</li> <li>• „Kategorien: gar nicht, kaum, mittel, stark?“</li> </ul> | <b>KI:</b><br><b>Unterstreichung (Stammfrage)</b> <ul style="list-style-type: none"> <li>• Unterstreichung unterstützt Betroffene, die Beeinträchtigung konsequent auf die Bewegungsstörung zu beziehen.</li> </ul> |
|----------------------------------------------------------------------------------------------------------------------------------------------------------------------------------------------------------------------|---------------------------------------------------------------------------------------------------------------------------------------------------------------------------------------------------------------------|

|                                                                                                           |                                                                                                                |                                                                                                                |                          |
|-----------------------------------------------------------------------------------------------------------|----------------------------------------------------------------------------------------------------------------|----------------------------------------------------------------------------------------------------------------|--------------------------|
| <b>7d. Version 1:</b><br>Wie stark wirkt sich Ihre Bewegungsstörung auf folgende Bereiche des Lebens aus? | <b>7d. Version 2:</b><br>Wie stark <b>beeinträchtigt</b> Ihre Bewegungsstörung folgende Bereiche Ihres Lebens? | <b>7d. Version 3:</b><br>Wie stark beeinträchtigt <b>Ihre Bewegungsstörung</b> folgende Bereiche Ihres Lebens? |                          |
| Arbeit oder Ausbildung                                                                                    |                                                                                                                |                                                                                                                |                          |
| Kaum                                                                                                      | mittel                                                                                                         | stark                                                                                                          | Kann ich nicht sagen     |
| <input type="checkbox"/>                                                                                  | <input type="checkbox"/>                                                                                       | <input type="checkbox"/>                                                                                       | <input type="checkbox"/> |

|                          |                          |                          |                          |                          |
|--------------------------|--------------------------|--------------------------|--------------------------|--------------------------|
| <b>gar nicht</b>         | kaum                     | mittel                   | stark                    | <b>trifft nicht zu</b>   |
| <input type="checkbox"/> | <input type="checkbox"/> | <input type="checkbox"/> | <input type="checkbox"/> | <input type="checkbox"/> |

|                          |                          |                          |                          |                          |
|--------------------------|--------------------------|--------------------------|--------------------------|--------------------------|
| <b>gar nicht</b>         | kaum                     | mittel                   | stark                    | <b>trifft nicht zu</b>   |
| <input type="checkbox"/> | <input type="checkbox"/> | <input type="checkbox"/> | <input type="checkbox"/> | <input type="checkbox"/> |

|                                                                                                                                                             |                                                                                                                                                                                                                     |
|-------------------------------------------------------------------------------------------------------------------------------------------------------------|---------------------------------------------------------------------------------------------------------------------------------------------------------------------------------------------------------------------|
| <b>CVI : 1,0</b><br><b>Umformulierung (Stammfrage)</b><br>Berücksichtigte Kommentare: <ul style="list-style-type: none"> <li>• „Beeinträchtigt?“</li> </ul> | <b>KI:</b><br><b>Unterstreichung (Stammfrage)</b> <ul style="list-style-type: none"> <li>• Unterstreichung unterstützt Betroffene, die Beeinträchtigung konsequent auf die Bewegungsstörung zu beziehen.</li> </ul> |
|-------------------------------------------------------------------------------------------------------------------------------------------------------------|---------------------------------------------------------------------------------------------------------------------------------------------------------------------------------------------------------------------|

- „Kategorien: gar nicht, kaum, mittel, stark?“

| 7f. Version 1:<br>Wie stark wirkt sich Ihre Bewegungsstörung auf folgende Bereiche des Lebens aus?                                                                                                                                                                   | 7e. Version 2:<br>Wie stark <b>beeinträchtigt</b> Ihre Bewegungsstörung folgende Bereiche Ihres Lebens? | 7e. Version 3:<br>Wie stark beeinträchtigt <b>Ihre Bewegungsstörung</b> folgende Bereiche Ihres Lebens? |                          |                          |                          |                          |                          |                          |                                                                                                                                                                                                                                                                                                                      |           |      |        |       |                 |                          |                          |                          |                          |                          |                                                                                                                                                                                                                                                                                                                      |           |      |        |       |                 |                          |                          |                          |                          |                          |
|----------------------------------------------------------------------------------------------------------------------------------------------------------------------------------------------------------------------------------------------------------------------|---------------------------------------------------------------------------------------------------------|---------------------------------------------------------------------------------------------------------|--------------------------|--------------------------|--------------------------|--------------------------|--------------------------|--------------------------|----------------------------------------------------------------------------------------------------------------------------------------------------------------------------------------------------------------------------------------------------------------------------------------------------------------------|-----------|------|--------|-------|-----------------|--------------------------|--------------------------|--------------------------|--------------------------|--------------------------|----------------------------------------------------------------------------------------------------------------------------------------------------------------------------------------------------------------------------------------------------------------------------------------------------------------------|-----------|------|--------|-------|-----------------|--------------------------|--------------------------|--------------------------|--------------------------|--------------------------|
| Fürsorge (Kinder versorgen, Eltern pflegen)                                                                                                                                                                                                                          | Fürsorge (Kinder versorgen, Eltern pflegen)                                                             | Fürsorge (Kinder versorgen, Eltern pflegen)                                                             |                          |                          |                          |                          |                          |                          |                                                                                                                                                                                                                                                                                                                      |           |      |        |       |                 |                          |                          |                          |                          |                          |                                                                                                                                                                                                                                                                                                                      |           |      |        |       |                 |                          |                          |                          |                          |                          |
| <table border="1"> <tr> <th>Kaum</th> <th>mittel</th> <th>stark</th> <th>Kann ich nicht sagen</th> </tr> <tr> <td><input type="checkbox"/></td> <td><input type="checkbox"/></td> <td><input type="checkbox"/></td> <td><input type="checkbox"/></td> </tr> </table> | Kaum                                                                                                    | mittel                                                                                                  | stark                    | Kann ich nicht sagen     | <input type="checkbox"/> | <input type="checkbox"/> | <input type="checkbox"/> | <input type="checkbox"/> | <table border="1"> <tr> <th>gar nicht</th> <th>kaum</th> <th>mittel</th> <th>stark</th> <th>trifft nicht zu</th> </tr> <tr> <td><input type="checkbox"/></td> <td><input type="checkbox"/></td> <td><input type="checkbox"/></td> <td><input type="checkbox"/></td> <td><input type="checkbox"/></td> </tr> </table> | gar nicht | kaum | mittel | stark | trifft nicht zu | <input type="checkbox"/> | <input type="checkbox"/> | <input type="checkbox"/> | <input type="checkbox"/> | <input type="checkbox"/> | <table border="1"> <tr> <th>gar nicht</th> <th>kaum</th> <th>mittel</th> <th>stark</th> <th>trifft nicht zu</th> </tr> <tr> <td><input type="checkbox"/></td> <td><input type="checkbox"/></td> <td><input type="checkbox"/></td> <td><input type="checkbox"/></td> <td><input type="checkbox"/></td> </tr> </table> | gar nicht | kaum | mittel | stark | trifft nicht zu | <input type="checkbox"/> | <input type="checkbox"/> | <input type="checkbox"/> | <input type="checkbox"/> | <input type="checkbox"/> |
| Kaum                                                                                                                                                                                                                                                                 | mittel                                                                                                  | stark                                                                                                   | Kann ich nicht sagen     |                          |                          |                          |                          |                          |                                                                                                                                                                                                                                                                                                                      |           |      |        |       |                 |                          |                          |                          |                          |                          |                                                                                                                                                                                                                                                                                                                      |           |      |        |       |                 |                          |                          |                          |                          |                          |
| <input type="checkbox"/>                                                                                                                                                                                                                                             | <input type="checkbox"/>                                                                                | <input type="checkbox"/>                                                                                | <input type="checkbox"/> |                          |                          |                          |                          |                          |                                                                                                                                                                                                                                                                                                                      |           |      |        |       |                 |                          |                          |                          |                          |                          |                                                                                                                                                                                                                                                                                                                      |           |      |        |       |                 |                          |                          |                          |                          |                          |
| gar nicht                                                                                                                                                                                                                                                            | kaum                                                                                                    | mittel                                                                                                  | stark                    | trifft nicht zu          |                          |                          |                          |                          |                                                                                                                                                                                                                                                                                                                      |           |      |        |       |                 |                          |                          |                          |                          |                          |                                                                                                                                                                                                                                                                                                                      |           |      |        |       |                 |                          |                          |                          |                          |                          |
| <input type="checkbox"/>                                                                                                                                                                                                                                             | <input type="checkbox"/>                                                                                | <input type="checkbox"/>                                                                                | <input type="checkbox"/> | <input type="checkbox"/> |                          |                          |                          |                          |                                                                                                                                                                                                                                                                                                                      |           |      |        |       |                 |                          |                          |                          |                          |                          |                                                                                                                                                                                                                                                                                                                      |           |      |        |       |                 |                          |                          |                          |                          |                          |
| gar nicht                                                                                                                                                                                                                                                            | kaum                                                                                                    | mittel                                                                                                  | stark                    | trifft nicht zu          |                          |                          |                          |                          |                                                                                                                                                                                                                                                                                                                      |           |      |        |       |                 |                          |                          |                          |                          |                          |                                                                                                                                                                                                                                                                                                                      |           |      |        |       |                 |                          |                          |                          |                          |                          |
| <input type="checkbox"/>                                                                                                                                                                                                                                             | <input type="checkbox"/>                                                                                | <input type="checkbox"/>                                                                                | <input type="checkbox"/> | <input type="checkbox"/> |                          |                          |                          |                          |                                                                                                                                                                                                                                                                                                                      |           |      |        |       |                 |                          |                          |                          |                          |                          |                                                                                                                                                                                                                                                                                                                      |           |      |        |       |                 |                          |                          |                          |                          |                          |

|                                                                                                                                                                                                                      |                                                                                                                                                                                                                     |
|----------------------------------------------------------------------------------------------------------------------------------------------------------------------------------------------------------------------|---------------------------------------------------------------------------------------------------------------------------------------------------------------------------------------------------------------------|
| <b>CVI : 1,0</b><br><b>Umformulierung (Stammfrage)</b><br>Berücksichtigte Kommentare: <ul style="list-style-type: none"> <li>• „Beeinträchtigt?“</li> <li>• „Kategorien: gar nicht, kaum, mittel, stark?“</li> </ul> | <b>KI:</b><br><b>Unterstreichung (Stammfrage)</b> <ul style="list-style-type: none"> <li>• Unterstreichung unterstützt Betroffene, die Beeinträchtigung konsequent auf die Bewegungsstörung zu beziehen.</li> </ul> |
|----------------------------------------------------------------------------------------------------------------------------------------------------------------------------------------------------------------------|---------------------------------------------------------------------------------------------------------------------------------------------------------------------------------------------------------------------|

| 7e. Version 1:<br>Wie stark wirkt sich Ihre Bewegungsstörung auf folgende Bereiche des Lebens aus?                                                                                                                                                                   | 7f. Version 2:<br>Wie stark <b>beeinträchtigt</b> Ihre Bewegungsstörung folgende Bereiche Ihres Lebens? | 7f. Version 3:<br>Wie stark beeinträchtigt <b>Ihre Bewegungsstörung</b> folgende Bereiche Ihres Lebens? |                          |                          |                          |                          |                          |                          |                                                                                                                                                                                                                                                                                                                      |           |      |        |       |                 |                          |                          |                          |                          |                          |                                                                                                                                                                                                                                                                                                                      |           |      |        |       |                 |                          |                          |                          |                          |                          |
|----------------------------------------------------------------------------------------------------------------------------------------------------------------------------------------------------------------------------------------------------------------------|---------------------------------------------------------------------------------------------------------|---------------------------------------------------------------------------------------------------------|--------------------------|--------------------------|--------------------------|--------------------------|--------------------------|--------------------------|----------------------------------------------------------------------------------------------------------------------------------------------------------------------------------------------------------------------------------------------------------------------------------------------------------------------|-----------|------|--------|-------|-----------------|--------------------------|--------------------------|--------------------------|--------------------------|--------------------------|----------------------------------------------------------------------------------------------------------------------------------------------------------------------------------------------------------------------------------------------------------------------------------------------------------------------|-----------|------|--------|-------|-----------------|--------------------------|--------------------------|--------------------------|--------------------------|--------------------------|
| Transport (Autofahren, Bus und Bahn)                                                                                                                                                                                                                                 | <b>Autofahren</b>                                                                                       | Autofahren                                                                                              |                          |                          |                          |                          |                          |                          |                                                                                                                                                                                                                                                                                                                      |           |      |        |       |                 |                          |                          |                          |                          |                          |                                                                                                                                                                                                                                                                                                                      |           |      |        |       |                 |                          |                          |                          |                          |                          |
| <table border="1"> <tr> <th>kaum</th> <th>mittel</th> <th>stark</th> <th>Kann ich nicht sagen</th> </tr> <tr> <td><input type="checkbox"/></td> <td><input type="checkbox"/></td> <td><input type="checkbox"/></td> <td><input type="checkbox"/></td> </tr> </table> | kaum                                                                                                    | mittel                                                                                                  | stark                    | Kann ich nicht sagen     | <input type="checkbox"/> | <input type="checkbox"/> | <input type="checkbox"/> | <input type="checkbox"/> | <table border="1"> <tr> <th>gar nicht</th> <th>kaum</th> <th>mittel</th> <th>stark</th> <th>trifft nicht zu</th> </tr> <tr> <td><input type="checkbox"/></td> <td><input type="checkbox"/></td> <td><input type="checkbox"/></td> <td><input type="checkbox"/></td> <td><input type="checkbox"/></td> </tr> </table> | gar nicht | kaum | mittel | stark | trifft nicht zu | <input type="checkbox"/> | <input type="checkbox"/> | <input type="checkbox"/> | <input type="checkbox"/> | <input type="checkbox"/> | <table border="1"> <tr> <th>gar nicht</th> <th>kaum</th> <th>mittel</th> <th>stark</th> <th>trifft nicht zu</th> </tr> <tr> <td><input type="checkbox"/></td> <td><input type="checkbox"/></td> <td><input type="checkbox"/></td> <td><input type="checkbox"/></td> <td><input type="checkbox"/></td> </tr> </table> | gar nicht | kaum | mittel | stark | trifft nicht zu | <input type="checkbox"/> | <input type="checkbox"/> | <input type="checkbox"/> | <input type="checkbox"/> | <input type="checkbox"/> |
| kaum                                                                                                                                                                                                                                                                 | mittel                                                                                                  | stark                                                                                                   | Kann ich nicht sagen     |                          |                          |                          |                          |                          |                                                                                                                                                                                                                                                                                                                      |           |      |        |       |                 |                          |                          |                          |                          |                          |                                                                                                                                                                                                                                                                                                                      |           |      |        |       |                 |                          |                          |                          |                          |                          |
| <input type="checkbox"/>                                                                                                                                                                                                                                             | <input type="checkbox"/>                                                                                | <input type="checkbox"/>                                                                                | <input type="checkbox"/> |                          |                          |                          |                          |                          |                                                                                                                                                                                                                                                                                                                      |           |      |        |       |                 |                          |                          |                          |                          |                          |                                                                                                                                                                                                                                                                                                                      |           |      |        |       |                 |                          |                          |                          |                          |                          |
| gar nicht                                                                                                                                                                                                                                                            | kaum                                                                                                    | mittel                                                                                                  | stark                    | trifft nicht zu          |                          |                          |                          |                          |                                                                                                                                                                                                                                                                                                                      |           |      |        |       |                 |                          |                          |                          |                          |                          |                                                                                                                                                                                                                                                                                                                      |           |      |        |       |                 |                          |                          |                          |                          |                          |
| <input type="checkbox"/>                                                                                                                                                                                                                                             | <input type="checkbox"/>                                                                                | <input type="checkbox"/>                                                                                | <input type="checkbox"/> | <input type="checkbox"/> |                          |                          |                          |                          |                                                                                                                                                                                                                                                                                                                      |           |      |        |       |                 |                          |                          |                          |                          |                          |                                                                                                                                                                                                                                                                                                                      |           |      |        |       |                 |                          |                          |                          |                          |                          |
| gar nicht                                                                                                                                                                                                                                                            | kaum                                                                                                    | mittel                                                                                                  | stark                    | trifft nicht zu          |                          |                          |                          |                          |                                                                                                                                                                                                                                                                                                                      |           |      |        |       |                 |                          |                          |                          |                          |                          |                                                                                                                                                                                                                                                                                                                      |           |      |        |       |                 |                          |                          |                          |                          |                          |
| <input type="checkbox"/>                                                                                                                                                                                                                                             | <input type="checkbox"/>                                                                                | <input type="checkbox"/>                                                                                | <input type="checkbox"/> | <input type="checkbox"/> |                          |                          |                          |                          |                                                                                                                                                                                                                                                                                                                      |           |      |        |       |                 |                          |                          |                          |                          |                          |                                                                                                                                                                                                                                                                                                                      |           |      |        |       |                 |                          |                          |                          |                          |                          |

|                                                                                                                                                                                                                                                                                                                                                                                                                        |                                                                                                                                                                                                                              |
|------------------------------------------------------------------------------------------------------------------------------------------------------------------------------------------------------------------------------------------------------------------------------------------------------------------------------------------------------------------------------------------------------------------------|------------------------------------------------------------------------------------------------------------------------------------------------------------------------------------------------------------------------------|
| <p><b>CVI : 1,0</b><br/> <b>Umformulierung (Einzelitem und Stammfrage)</b><br/> Berücksichtigte Kommentare:</p> <ul style="list-style-type: none"> <li>• „Beeinträchtigt?“</li> <li>• „Kategorien: gar nicht, kaum, mittel, stark?“</li> </ul> <p><b>Itemsplitting</b><br/> Berücksichtigte Kommentare:</p> <ul style="list-style-type: none"> <li>• „aus meiner Sicht besser: Auto-, Bus- und Bahnfahren.“</li> </ul> | <p><b>KI:</b><br/> <b>Unterstreichung (Stammfrage)</b></p> <ul style="list-style-type: none"> <li>• Unterstreichung unterstützt Betroffene, die Beeinträchtigung konsequent auf die Bewegungsstörung zu beziehen.</li> </ul> |
|------------------------------------------------------------------------------------------------------------------------------------------------------------------------------------------------------------------------------------------------------------------------------------------------------------------------------------------------------------------------------------------------------------------------|------------------------------------------------------------------------------------------------------------------------------------------------------------------------------------------------------------------------------|

| <p><b>7b. Version 1:</b></p> <p>Wie stark wirkt sich Ihre Bewegungsstörung auf folgende Bereiche des Lebens aus?</p> <p>Transport (Autofahren, Bus und Bahn)</p>                                                                                                     | <p><b>7g. Version 2:</b></p> <p>Wie stark <b>beeinträchtigt</b> Ihre Bewegungsstörung folgende Bereiche Ihres Lebens?</p> <p><b>Bus- oder Bahnfahren</b></p> | <p><b>7g. Version 3:</b></p> <p>Wie stark beeinträchtigt <b>Ihre Bewegungsstörung</b> folgende Bereiche Ihres Lebens?</p> <p>Bus- oder Bahnfahren</p> |                          |                          |                          |                          |                          |                          |                                                                                                                                                                                                                                                                                                                      |           |      |        |       |                 |                          |                          |                          |                          |                          |                                                                                                                                                                                                                                                                                                                      |           |      |        |       |                 |                          |                          |                          |                          |                          |
|----------------------------------------------------------------------------------------------------------------------------------------------------------------------------------------------------------------------------------------------------------------------|--------------------------------------------------------------------------------------------------------------------------------------------------------------|-------------------------------------------------------------------------------------------------------------------------------------------------------|--------------------------|--------------------------|--------------------------|--------------------------|--------------------------|--------------------------|----------------------------------------------------------------------------------------------------------------------------------------------------------------------------------------------------------------------------------------------------------------------------------------------------------------------|-----------|------|--------|-------|-----------------|--------------------------|--------------------------|--------------------------|--------------------------|--------------------------|----------------------------------------------------------------------------------------------------------------------------------------------------------------------------------------------------------------------------------------------------------------------------------------------------------------------|-----------|------|--------|-------|-----------------|--------------------------|--------------------------|--------------------------|--------------------------|--------------------------|
| <table border="1"> <tr> <th>kaum</th> <th>mittel</th> <th>stark</th> <th>Kann ich nicht sagen</th> </tr> <tr> <td><input type="checkbox"/></td> <td><input type="checkbox"/></td> <td><input type="checkbox"/></td> <td><input type="checkbox"/></td> </tr> </table> | kaum                                                                                                                                                         | mittel                                                                                                                                                | stark                    | Kann ich nicht sagen     | <input type="checkbox"/> | <input type="checkbox"/> | <input type="checkbox"/> | <input type="checkbox"/> | <table border="1"> <tr> <th>gar nicht</th> <th>kaum</th> <th>mittel</th> <th>stark</th> <th>trifft nicht zu</th> </tr> <tr> <td><input type="checkbox"/></td> <td><input type="checkbox"/></td> <td><input type="checkbox"/></td> <td><input type="checkbox"/></td> <td><input type="checkbox"/></td> </tr> </table> | gar nicht | kaum | mittel | stark | trifft nicht zu | <input type="checkbox"/> | <input type="checkbox"/> | <input type="checkbox"/> | <input type="checkbox"/> | <input type="checkbox"/> | <table border="1"> <tr> <th>gar nicht</th> <th>kaum</th> <th>mittel</th> <th>stark</th> <th>trifft nicht zu</th> </tr> <tr> <td><input type="checkbox"/></td> <td><input type="checkbox"/></td> <td><input type="checkbox"/></td> <td><input type="checkbox"/></td> <td><input type="checkbox"/></td> </tr> </table> | gar nicht | kaum | mittel | stark | trifft nicht zu | <input type="checkbox"/> | <input type="checkbox"/> | <input type="checkbox"/> | <input type="checkbox"/> | <input type="checkbox"/> |
| kaum                                                                                                                                                                                                                                                                 | mittel                                                                                                                                                       | stark                                                                                                                                                 | Kann ich nicht sagen     |                          |                          |                          |                          |                          |                                                                                                                                                                                                                                                                                                                      |           |      |        |       |                 |                          |                          |                          |                          |                          |                                                                                                                                                                                                                                                                                                                      |           |      |        |       |                 |                          |                          |                          |                          |                          |
| <input type="checkbox"/>                                                                                                                                                                                                                                             | <input type="checkbox"/>                                                                                                                                     | <input type="checkbox"/>                                                                                                                              | <input type="checkbox"/> |                          |                          |                          |                          |                          |                                                                                                                                                                                                                                                                                                                      |           |      |        |       |                 |                          |                          |                          |                          |                          |                                                                                                                                                                                                                                                                                                                      |           |      |        |       |                 |                          |                          |                          |                          |                          |
| gar nicht                                                                                                                                                                                                                                                            | kaum                                                                                                                                                         | mittel                                                                                                                                                | stark                    | trifft nicht zu          |                          |                          |                          |                          |                                                                                                                                                                                                                                                                                                                      |           |      |        |       |                 |                          |                          |                          |                          |                          |                                                                                                                                                                                                                                                                                                                      |           |      |        |       |                 |                          |                          |                          |                          |                          |
| <input type="checkbox"/>                                                                                                                                                                                                                                             | <input type="checkbox"/>                                                                                                                                     | <input type="checkbox"/>                                                                                                                              | <input type="checkbox"/> | <input type="checkbox"/> |                          |                          |                          |                          |                                                                                                                                                                                                                                                                                                                      |           |      |        |       |                 |                          |                          |                          |                          |                          |                                                                                                                                                                                                                                                                                                                      |           |      |        |       |                 |                          |                          |                          |                          |                          |
| gar nicht                                                                                                                                                                                                                                                            | kaum                                                                                                                                                         | mittel                                                                                                                                                | stark                    | trifft nicht zu          |                          |                          |                          |                          |                                                                                                                                                                                                                                                                                                                      |           |      |        |       |                 |                          |                          |                          |                          |                          |                                                                                                                                                                                                                                                                                                                      |           |      |        |       |                 |                          |                          |                          |                          |                          |
| <input type="checkbox"/>                                                                                                                                                                                                                                             | <input type="checkbox"/>                                                                                                                                     | <input type="checkbox"/>                                                                                                                              | <input type="checkbox"/> | <input type="checkbox"/> |                          |                          |                          |                          |                                                                                                                                                                                                                                                                                                                      |           |      |        |       |                 |                          |                          |                          |                          |                          |                                                                                                                                                                                                                                                                                                                      |           |      |        |       |                 |                          |                          |                          |                          |                          |

|                                                                                                                                                                                                                                                                                                                                                                                                                                                     |                                                                                                                                                                                                                              |
|-----------------------------------------------------------------------------------------------------------------------------------------------------------------------------------------------------------------------------------------------------------------------------------------------------------------------------------------------------------------------------------------------------------------------------------------------------|------------------------------------------------------------------------------------------------------------------------------------------------------------------------------------------------------------------------------|
| <p><b>CVI : 1,0</b><br/> <b>Art der Veränderung:</b><br/> <b>Itemrevision Einzelitem und Stammfrage</b><br/> Berücksichtigte Kommentare:</p> <ul style="list-style-type: none"> <li>• „Beeinträchtigt?“</li> <li>• „Kategorien: gar nicht, kaum, mittel, stark?“</li> </ul> <p><b>Itemsplitting</b><br/> Berücksichtigte Kommentare:</p> <ul style="list-style-type: none"> <li>• „aus meiner Sicht besser: Auto-, Bus- und Bahnfahren.“</li> </ul> | <p><b>KI:</b><br/> <b>Unterstreichung (Stammfrage)</b></p> <ul style="list-style-type: none"> <li>• Unterstreichung unterstützt Betroffene, die Beeinträchtigung konsequent auf die Bewegungsstörung zu beziehen.</li> </ul> |
|-----------------------------------------------------------------------------------------------------------------------------------------------------------------------------------------------------------------------------------------------------------------------------------------------------------------------------------------------------------------------------------------------------------------------------------------------------|------------------------------------------------------------------------------------------------------------------------------------------------------------------------------------------------------------------------------|
