# Supplementary material for: Entwicklung und inhaltliche Validierung eines Fragebogens für funktionelle Bewegungsstörungen
Source: Springer Nature journal article supplement (doi:10.1007/s00115-021-01247-1), 2021-12-23
Supplement: MOESM4 [file 19974526]

# Fragebogen für funktionelle Bewegungsstörungen

Dieser Fragebogen soll das Ausmaß und die Auswirkungen Ihrer Bewegungsstörung erfassen.

Bitte beantworten Sie alle Fragen, indem Sie in jeder Reihe jeweils ein Kästchen markieren.

Die Fragen beziehen sich auf Ihre Erfahrungen **in den letzten zwei Wochen**. Falls Ihre Beschwerden sehr wechselhaft sind, legen Sie Ihren Antworten einen typischen schlechten Tag innerhalb der letzten zwei Wochen zugrunde.

| 1. Wie oft treten folgende Beschwerden auf?    | nie                      | selten                   | manchmal                 | häufig                   | immer                    |
|------------------------------------------------|--------------------------|--------------------------|--------------------------|--------------------------|--------------------------|
| Muskelschwäche oder -lähmung                   | <input type="checkbox"/> | <input type="checkbox"/> | <input type="checkbox"/> | <input type="checkbox"/> | <input type="checkbox"/> |
| Muskelverkrampfung                             | <input type="checkbox"/> | <input type="checkbox"/> | <input type="checkbox"/> | <input type="checkbox"/> | <input type="checkbox"/> |
| Zittern oder Muskelzuckungen                   | <input type="checkbox"/> | <input type="checkbox"/> | <input type="checkbox"/> | <input type="checkbox"/> | <input type="checkbox"/> |
| Unwillkürliche Bewegungen                      | <input type="checkbox"/> | <input type="checkbox"/> | <input type="checkbox"/> | <input type="checkbox"/> | <input type="checkbox"/> |
| Ungezielte Bewegungen (Koordinationsstörungen) | <input type="checkbox"/> | <input type="checkbox"/> | <input type="checkbox"/> | <input type="checkbox"/> | <input type="checkbox"/> |
| Bewegungsblockade oder -starre                 | <input type="checkbox"/> | <input type="checkbox"/> | <input type="checkbox"/> | <input type="checkbox"/> | <input type="checkbox"/> |

| 2. Fühlen Sie sich im Alltag durch folgende Beschwerden beeinträchtigt, wenn Sie sich bewegen? | gar nicht                | kaum                     | mittel                   | stark                    | sehr stark               |
|------------------------------------------------------------------------------------------------|--------------------------|--------------------------|--------------------------|--------------------------|--------------------------|
| Muskelschwäche oder -lähmung                                                                   | <input type="checkbox"/> | <input type="checkbox"/> | <input type="checkbox"/> | <input type="checkbox"/> | <input type="checkbox"/> |
| Muskelverkrampfung                                                                             | <input type="checkbox"/> | <input type="checkbox"/> | <input type="checkbox"/> | <input type="checkbox"/> | <input type="checkbox"/> |
| Zittern oder Muskelzuckungen                                                                   | <input type="checkbox"/> | <input type="checkbox"/> | <input type="checkbox"/> | <input type="checkbox"/> | <input type="checkbox"/> |
| Unwillkürliche Bewegungen                                                                      | <input type="checkbox"/> | <input type="checkbox"/> | <input type="checkbox"/> | <input type="checkbox"/> | <input type="checkbox"/> |
| Ungezielte Bewegungen (Koordinationsstörungen)                                                 | <input type="checkbox"/> | <input type="checkbox"/> | <input type="checkbox"/> | <input type="checkbox"/> | <input type="checkbox"/> |
| Bewegungsblockade oder -starre                                                                 | <input type="checkbox"/> | <input type="checkbox"/> | <input type="checkbox"/> | <input type="checkbox"/> | <input type="checkbox"/> |

| 3. Wie häufig sind folgende Körperteile von Ihrer Bewegungsstörung betroffen? | nie                      | selten                   | manchmal                 | häufig                   | immer                    |
|-------------------------------------------------------------------------------|--------------------------|--------------------------|--------------------------|--------------------------|--------------------------|
| Kopf/Hals                                                                     | <input type="checkbox"/> | <input type="checkbox"/> | <input type="checkbox"/> | <input type="checkbox"/> | <input type="checkbox"/> |
| Rumpf                                                                         | <input type="checkbox"/> | <input type="checkbox"/> | <input type="checkbox"/> | <input type="checkbox"/> | <input type="checkbox"/> |
| Arme und Hände                                                                | <input type="checkbox"/> | <input type="checkbox"/> | <input type="checkbox"/> | <input type="checkbox"/> | <input type="checkbox"/> |
| Beine und Füße                                                                | <input type="checkbox"/> | <input type="checkbox"/> | <input type="checkbox"/> | <input type="checkbox"/> | <input type="checkbox"/> |
